# Supplementary material for: Assessment of paleo-ocean pH records from boron isotope ratio in the Pacific and Atlantic ocean corals: Role of anthropogenic CO&lt;sub&gt;2&lt;/sub&gt; forcing and oceanographic factors to pH variability
Source: Copernicus journal article supplement (doi:10.5194/bg-2018-438), 2018-10-15
Supplement: Supplementary file 1 [file Supplementary data.xlsx]

## Sheet: Copy
Year(AD)	Latitude	Longitude	δ11B coral	δ11B (2sd)	pHCF	pHsw	Reef/location	Analysis	Coral type	References	Remark
1998-2001	18.208	109.499	23.03	0.28	8.42843	7.958	Xiaodonghai Reef, South China Sea	MC-ICP-MS	Porites sp.	Liu et al., 2014
1994-1997	18.208	109.499	23.28	0.28	8.44483	7.9932	Xiaodonghai Reef, South China Sea	MC-ICP-MS	Porites sp.	Liu et al., 2014
1990-1993	18.208	109.499	22.16	0.28	8.37026	7.83318	Xiaodonghai Reef, South China Sea	MC-ICP-MS	Porites sp.	Liu et al., 2014
1986-1989	18.208	109.499	22.39	0.28	8.38582	7.86657	Xiaodonghai Reef, South China Sea	MC-ICP-MS	Porites sp.	Liu et al., 2014
1982-1985	18.208	109.499	23.27	0.28	8.44418	7.9918	Xiaodonghai Reef, South China Sea	MC-ICP-MS	Porites sp.	Liu et al., 2014		pH Calcifying fluid (pHCF) is calculated from equation 1 using the following constants
1978-1981	18.208	109.499	23.47	0.28	8.45722	8.01979	Xiaodonghai Reef, South China Sea	MC-ICP-MS	Porites sp.	Liu et al., 2014		pKB = 8.597	11-10kB = 1.0272	δ11BSW = 39.61
1974-1977	18.208	109.499	23.54	0.28	8.46177	8.02955	Xiaodonghai Reef, South China Sea	MC-ICP-MS	Porites sp.	Liu et al., 2014		pH seawater (pHSW) is calculated from pHCF using following calibration equation
1970-1973	18.208	109.499	23.13	0.28	8.43501	7.97212	Xiaodonghai Reef, South China Sea	MC-ICP-MS	Porites sp.	Liu et al., 2014		pHSW = (pHCF - 4.72)/0.466
1966-1969	18.208	109.499	23.41	0.28	8.45332	8.01141	Xiaodonghai Reef, South China Sea	MC-ICP-MS	Porites sp.	Liu et al., 2014
1962-1965	18.208	109.499	22.75	0.28	8.40991	7.91825	Xiaodonghai Reef, South China Sea	MC-ICP-MS	Porites sp.	Liu et al., 2014
1958-1961	18.208	109.499	23.1	0.28	8.43303	7.96789	Xiaodonghai Reef, South China Sea	MC-ICP-MS	Porites sp.	Liu et al., 2014
1954-1957	18.208	109.499	23.96	0.28	8.48891	8.08778	Xiaodonghai Reef, South China Sea	MC-ICP-MS	Porites sp.	Liu et al., 2014
1950-1953	18.208	109.499	24.18	0.28	8.50302	8.11808	Xiaodonghai Reef, South China Sea	MC-ICP-MS	Porites sp.	Liu et al., 2014
1946-1949	18.208	109.499	24.1	0.28	8.4979	8.10708	Xiaodonghai Reef, South China Sea	MC-ICP-MS	Porites sp.	Liu et al., 2014
1942-1945	18.208	109.499	24.23	0.28	8.50623	8.12495	Xiaodonghai Reef, South China Sea	MC-ICP-MS	Porites sp.	Liu et al., 2014
1938-1941	18.208	109.499	23.67	0.28	8.4702	8.04764	Xiaodonghai Reef, South China Sea	MC-ICP-MS	Porites sp.	Liu et al., 2014
1934-1937	18.208	109.499	23.53	0.28	8.46112	8.02816	Xiaodonghai Reef, South China Sea	MC-ICP-MS	Porites sp.	Liu et al., 2014
1930-1933	18.208	109.499	24.11	0.28	8.49854	8.10845	Xiaodonghai Reef, South China Sea	MC-ICP-MS	Porites sp.	Liu et al., 2014
1926-1929	18.208	109.499	23.86	0.28	8.48247	8.07397	Xiaodonghai Reef, South China Sea	MC-ICP-MS	Porites sp.	Liu et al., 2014
1922-1925	18.208	109.499	23.66	0.28	8.46955	8.04625	Xiaodonghai Reef, South China Sea	MC-ICP-MS	Porites sp.	Liu et al., 2014
1918-1921	18.208	109.499	23.5	0.28	8.45917	8.02398	Xiaodonghai Reef, South China Sea	MC-ICP-MS	Porites sp.	Liu et al., 2014
1914-1917	18.208	109.499	24.14	0.28	8.50046	8.11258	Xiaodonghai Reef, South China Sea	MC-ICP-MS	Porites sp.	Liu et al., 2014
1910-1913	18.208	109.499	24.37	0.28	8.51517	8.14415	Xiaodonghai Reef, South China Sea	MC-ICP-MS	Porites sp.	Liu et al., 2014
1906-1909	18.208	109.499	23.8	0.28	8.4786	8.06566	Xiaodonghai Reef, South China Sea	MC-ICP-MS	Porites sp.	Liu et al., 2014
1902-1905	18.208	109.499	24.23	0.28	8.50623	8.12495	Xiaodonghai Reef, South China Sea	MC-ICP-MS	Porites sp.	Liu et al., 2014
1898-1901	18.208	109.499	23.77	0.28	8.47666	8.06151	Xiaodonghai Reef, South China Sea	MC-ICP-MS	Porites sp.	Liu et al., 2014
1894-1897	18.208	109.499	23.57	0.28	8.46372	8.03373	Xiaodonghai Reef, South China Sea	MC-ICP-MS	Porites sp.	Liu et al., 2014
1890-1893	18.208	109.499	24.79	0.28	8.5419	8.20151	Xiaodonghai Reef, South China Sea	MC-ICP-MS	Porites sp.	Liu et al., 2014
1886-1889	18.208	109.499	24.49	0.28	8.52283	8.16057	Xiaodonghai Reef, South China Sea	MC-ICP-MS	Porites sp.	Liu et al., 2014
1882-1885	18.208	109.499	23.9	0.28	8.48505	8.0795	Xiaodonghai Reef, South China Sea	MC-ICP-MS	Porites sp.	Liu et al., 2014
1878-1881	18.208	109.499	23.66	0.28	8.46955	8.04625	Xiaodonghai Reef, South China Sea	MC-ICP-MS	Porites sp.	Liu et al., 2014
1874-1877	18.208	109.499	24.56	0.28	8.52728	8.17014	Xiaodonghai Reef, South China Sea	MC-ICP-MS	Porites sp.	Liu et al., 2014
1870-1873	18.208	109.499	24.42	0.28	8.51836	8.15099	Xiaodonghai Reef, South China Sea	MC-ICP-MS	Porites sp.	Liu et al., 2014
1866-1869	18.208	109.499	24.91	0.28	8.54952	8.21785	Xiaodonghai Reef, South China Sea	MC-ICP-MS	Porites sp.	Liu et al., 2014
1862-1865	18.208	109.499	24.69	0.28	8.53555	8.18788	Xiaodonghai Reef, South China Sea	MC-ICP-MS	Porites sp.	Liu et al., 2014
1858-1861	18.208	109.499	24.88	0.28	8.54762	8.21377	Xiaodonghai Reef, South China Sea	MC-ICP-MS	Porites sp.	Liu et al., 2014
1854-1857	18.208	109.499	24.68	0.28	8.53492	8.18652	Xiaodonghai Reef, South China Sea	MC-ICP-MS	Porites sp.	Liu et al., 2014
1850-1853	18.208	109.499	24.43	0.28	8.519	8.15236	Xiaodonghai Reef, South China Sea	MC-ICP-MS	Porites sp.	Liu et al., 2014
1846-1849	18.208	109.499	24.32	0.28	8.51198	8.1373	Xiaodonghai Reef, South China Sea	MC-ICP-MS	Porites sp.	Liu et al., 2014
1842-1845	18.208	109.499	24.67	0.28	8.53428	8.18516	Xiaodonghai Reef, South China Sea	MC-ICP-MS	Porites sp.	Liu et al., 2014
1838-1841	18.208	109.499	24.21	0.28	8.50495	8.1222	Xiaodonghai Reef, South China Sea	MC-ICP-MS	Porites sp.	Liu et al., 2014
1986 - 1990	-17.5	148.3	22.99	0.27	8.42579	7.95235	Flinders Reef	NTIMS	Porites sp.	Pelejero et al., 2005
1981 - 1985	-17.5	148.3	24.17	0.28	8.50238	8.1167	Flinders Reef	NTIMS	Porites sp.	Pelejero et al., 2005
1976 - 1980	-17.5	148.3	23.43	0.3	8.45462	8.0142	Flinders Reef	NTIMS	Porites sp.	Pelejero et al., 2005
1971 -1975	-17.5	148.3	23.64	0.07	8.46826	8.04347	Flinders Reef	NTIMS	Porites sp.	Pelejero et al., 2005
1966 -1970	-17.5	148.3	24.57	0	8.52792	8.17151	Flinders Reef	NTIMS	Porites sp.	Pelejero et al., 2005
1961 -1965	-17.5	148.3	24.83	0.29	8.54444	8.20696	Flinders Reef	NTIMS	Porites sp.	Pelejero et al., 2005
1956 -1960	-17.5	148.3	23.77	0	8.47666	8.06151	Flinders Reef	NTIMS	Porites sp.	Pelejero et al., 2005
1951 -1955	-17.5	148.3	24.89	0.24	8.54825	8.21513	Flinders Reef	NTIMS	Porites sp.	Pelejero et al., 2005
1946 -1950	-17.5	148.3	23.97	0.31	8.48955	8.08916	Flinders Reef	NTIMS	Porites sp.	Pelejero et al., 2005
1941 -1945	-17.5	148.3	23.51	0.28	8.45982	8.02537	Flinders Reef	NTIMS	Porites sp.	Pelejero et al., 2005
1936 -1940	-17.5	148.3	23.45	0.28	8.45592	8.017	Flinders Reef	NTIMS	Porites sp.	Pelejero et al., 2005
1931 -1935	-17.5	148.3	23.53	0.14	8.46112	8.02816	Flinders Reef	NTIMS	Porites sp.	Pelejero et al., 2005
1926 -1930	-17.5	148.3	23.92	0.29	8.48633	8.08226	Flinders Reef	NTIMS	Porites sp.	Pelejero et al., 2005
1921 -1925	-17.5	148.3	23.95	0.18	8.48826	8.0864	Flinders Reef	NTIMS	Porites sp.	Pelejero et al., 2005
1916 -1920	-17.5	148.3	24.39	0.33	8.51645	8.14689	Flinders Reef	NTIMS	Porites sp.	Pelejero et al., 2005
1911 -1915	-17.5	148.3	23.66	0.22	8.46955	8.04625	Flinders Reef	NTIMS	Porites sp.	Pelejero et al., 2005
1906 -1910	-17.5	148.3	23.36	0.31	8.45006	8.00441	Flinders Reef	NTIMS	Porites sp.	Pelejero et al., 2005
1901 -1905	-17.5	148.3	23.92	0.21	8.48633	8.08226	Flinders Reef	NTIMS	Porites sp.	Pelejero et al., 2005
1896 -1900	-17.5	148.3	23.78	0.17	8.47731	8.06289	Flinders Reef	NTIMS	Porites sp.	Pelejero et al., 2005
1891 -1895	-17.5	148.3	23.2	0.2	8.4396	7.98197	Flinders Reef	NTIMS	Porites sp.	Pelejero et al., 2005
1886 -1890	-17.5	148.3	23.85	0.13	8.48182	8.07258	Flinders Reef	NTIMS	Porites sp.	Pelejero et al., 2005
1881 -1885	-17.5	148.3	23.4	0.05	8.45267	8.01001	Flinders Reef	NTIMS	Porites sp.	Pelejero et al., 2005
1876 -1880	-17.5	148.3	24.23	0.16	8.50623	8.12495	Flinders Reef	NTIMS	Porites sp.	Pelejero et al., 2005
1871-1875	-17.5	148.3	23.88	0.3	8.48376	8.07673	Flinders Reef	NTIMS	Porites sp.	Pelejero et al., 2005
1866 -1870	-17.5	148.3	23.77	0.01	8.47666	8.06151	Flinders Reef	NTIMS	Porites sp.	Pelejero et al., 2005
1861 -1865	-17.5	148.3	24.05	0.34	8.49469	8.10019	Flinders Reef	NTIMS	Porites sp.	Pelejero et al., 2005
1856 -1860	-17.5	148.3	24.38	0.08	8.51581	8.14552	Flinders Reef	NTIMS	Porites sp.	Pelejero et al., 2005
1851 -1855	-17.5	148.3	23.79	0.3	8.47795	8.06428	Flinders Reef	NTIMS	Porites sp.	Pelejero et al., 2005
1846 -1850	-17.5	148.3	23.61	0	8.46631	8.0393	Flinders Reef	NTIMS	Porites sp.	Pelejero et al., 2005
1841 -1845	-17.5	148.3	23.36	0.33	8.45006	8.00441	Flinders Reef	NTIMS	Porites sp.	Pelejero et al., 2005
1836 -1840	-17.5	148.3	23.29	0.16	8.44549	7.99461	Flinders Reef	NTIMS	Porites sp.	Pelejero et al., 2005
1831 -1835	-17.5	148.3	23.35	0.03	8.4494	8.00301	Flinders Reef	NTIMS	Porites sp.	Pelejero et al., 2005
1829 - 1830	-17.5	148.3	23.2	0.16	8.4396	7.98197	Flinders Reef	NTIMS	Porites sp.	Pelejero et al., 2005
1826 - 1828	-17.5	148.3	24.08	0.05	8.49661	8.10432	Flinders Reef	NTIMS	Porites sp.	Pelejero et al., 2005
1826 - 1830	-17.5	148.3	23.73	0.16	8.47408	8.05596	Flinders Reef	NTIMS	Porites sp.	Pelejero et al., 2005
1821 -1825	-17.5	148.3	24.44	0.1	8.51964	8.15373	Flinders Reef	NTIMS	Porites sp.	Pelejero et al., 2005
1816 -1820	-17.5	148.3	24.21	0.03	8.50495	8.1222	Flinders Reef	NTIMS	Porites sp.	Pelejero et al., 2005
1811 -1815	-17.5	148.3	24.51	0.28	8.5241	8.16331	Flinders Reef	NTIMS	Porites sp.	Pelejero et al., 2005
1806 -1810	-17.5	148.3	24.28	0.24	8.50942	8.13181	Flinders Reef	NTIMS	Porites sp.	Pelejero et al., 2005
1801 -1805	-17.5	148.3	23.67	0.12	8.4702	8.04764	Flinders Reef	NTIMS	Porites sp.	Pelejero et al., 2005
1796 -1800	-17.5	148.3	23.39	0.26	8.45201	8.00861	Flinders Reef	NTIMS	Porites sp.	Pelejero et al., 2005
1791 -1795	-17.5	148.3	23.94	0.27	8.48762	8.08502	Flinders Reef	NTIMS	Porites sp.	Pelejero et al., 2005
1786 -1790	-17.5	148.3	23.75	0.25	8.47537	8.05874	Flinders Reef	NTIMS	Porites sp.	Pelejero et al., 2005
1781 -1785	-17.5	148.3	23.84	0.19	8.48118	8.0712	Flinders Reef	NTIMS	Porites sp.	Pelejero et al., 2005
1776 -1780	-17.5	148.3	24.47	0.16	8.52155	8.15784	Flinders Reef	NTIMS	Porites sp.	Pelejero et al., 2005
1771 -1775	-17.5	148.3	24.24	0.03	8.50687	8.12632	Flinders Reef	NTIMS	Porites sp.	Pelejero et al., 2005
1766 -1770	-17.5	148.3	24.08	0.12	8.49661	8.10432	Flinders Reef	NTIMS	Porites sp.	Pelejero et al., 2005
1761 -1765	-17.5	148.3	24.06	0.19	8.49533	8.10157	Flinders Reef	NTIMS	Porites sp.	Pelejero et al., 2005
1759 - 1760	-17.5	148.3	24.06	0.27	8.49533	8.10157	Flinders Reef	NTIMS	Porites sp.	Pelejero et al., 2005
1756 - 1758	-17.5	148.3	24.12	0.29	8.49918	8.10983	Flinders Reef	NTIMS	Porites sp.	Pelejero et al., 2005
1756 -1760	-17.5	148.3	24.1	0.29	8.4979	8.10708	Flinders Reef	NTIMS	Porites sp.	Pelejero et al., 2005
1751 -1755	-17.5	148.3	23.78	0.25	8.47731	8.06289	Flinders Reef	NTIMS	Porites sp.	Pelejero et al., 2005
1746 -1750	-17.5	148.3	23.49	0.32	8.45852	8.02258	Flinders Reef	NTIMS	Porites sp.	Pelejero et al., 2005
1741 -1745	-17.5	148.3	23.77	0.11	8.47666	8.06151	Flinders Reef	NTIMS	Porites sp.	Pelejero et al., 2005
1738 - 1740	-17.5	148.3	22.79	0.04	8.41256	7.92395	Flinders Reef	NTIMS	Porites sp.	Pelejero et al., 2005
1736 - 1737	-17.5	148.3	24.15	0.3	8.5011	8.11395	Flinders Reef	NTIMS	Porites sp.	Pelejero et al., 2005
1736 - 1740	-17.5	148.3	23.33	0.3	8.4481	8.00021	Flinders Reef	NTIMS	Porites sp.	Pelejero et al., 2005
1731 -1735	-17.5	148.3	24.2	0.16	8.50431	8.12083	Flinders Reef	NTIMS	Porites sp.	Pelejero et al., 2005
1726 -1730	-17.5	148.3	24.08	0.1	8.49661	8.10432	Flinders Reef	NTIMS	Porites sp.	Pelejero et al., 2005
1721 -1725	-17.5	148.3	23.82	0.26	8.47989	8.06843	Flinders Reef	NTIMS	Porites sp.	Pelejero et al., 2005
1716 -1720	-17.5	148.3	24.52	0.31	8.52474	8.16467	Flinders Reef	NTIMS	Porites sp.	Pelejero et al., 2005
1711 -1715	-17.5	148.3	24.97	0.1	8.55332	8.22601	Flinders Reef	NTIMS	Porites sp.	Pelejero et al., 2005
1706 - 1710	-17.5	148.3	24.79	0.27	8.5419	8.20151	Flinders Reef	NTIMS	Porites sp.	Pelejero et al., 2005
1999	13.6	144.833	22.75	0.19	8.40991	7.91825	Double Reef, Guam Island	MC-ICPMS	Porites sp.	Shinjo et al., 2013
1998	13.6	144.833	23.07	0.18	8.43106	7.96365	Double Reef, Guam Island	MC-ICPMS	Porites sp.	Shinjo et al., 2013
1997	13.6	144.833	23	0.14	8.42645	7.95376	Double Reef, Guam Island	MC-ICPMS	Porites sp.	Shinjo et al., 2013
1996	13.6	144.833	23.18	0.15	8.43829	7.97915	Double Reef, Guam Island	MC-ICPMS	Porites sp.	Shinjo et al., 2013
1995	13.6	144.833	22.77	0.21	8.41123	7.9211	Double Reef, Guam Island	MC-ICPMS	Porites sp.	Shinjo et al., 2013
1994	13.6	144.833	22.91	0.13	8.42051	7.94101	Double Reef, Guam Island	MC-ICPMS	Porites sp.	Shinjo et al., 2013
1993	13.6	144.833	23.17	0.21	8.43763	7.97775	Double Reef, Guam Island	MC-ICPMS	Porites sp.	Shinjo et al., 2013
1992	13.6	144.833	23	0.08	8.42645	7.95376	Double Reef, Guam Island	MC-ICPMS	Porites sp.	Shinjo et al., 2013
1991	13.6	144.833	22.76	0.1	8.41057	7.91968	Double Reef, Guam Island	MC-ICPMS	Porites sp.	Shinjo et al., 2013
1990	13.6	144.833	23.64	0.22	8.46826	8.04347	Double Reef, Guam Island	MC-ICPMS	Porites sp.	Shinjo et al., 2013
1989	13.6	144.833	22.39	0.17	8.38582	7.86657	Double Reef, Guam Island	MC-ICPMS	Porites sp.	Shinjo et al., 2013
1988	13.6	144.833	22.45	0.15	8.38986	7.87523	Double Reef, Guam Island	MC-ICPMS	Porites sp.	Shinjo et al., 2013
1987	13.6	144.833	22.72	0.23	8.40791	7.91397	Double Reef, Guam Island	MC-ICPMS	Porites sp.	Shinjo et al., 2013
1986	13.6	144.833	22.78	0.13	8.4119	7.92253	Double Reef, Guam Island	MC-ICPMS	Porites sp.	Shinjo et al., 2013
1985	13.6	144.833	23.18	0.23	8.43829	7.97915	Double Reef, Guam Island	MC-ICPMS	Porites sp.	Shinjo et al., 2013
1984	13.6	144.833	23.16	0.22	8.43697	7.97634	Double Reef, Guam Island	MC-ICPMS	Porites sp.	Shinjo et al., 2013
1983	13.6	144.833	22.37	0.09	8.38447	7.86368	Double Reef, Guam Island	MC-ICPMS	Porites sp.	Shinjo et al., 2013
1982	13.6	144.833	22.1	0.12	8.36618	7.82441	Double Reef, Guam Island	MC-ICPMS	Porites sp.	Shinjo et al., 2013
1981	13.6	144.833	22.63	0.24	8.40191	7.9011	Double Reef, Guam Island	MC-ICPMS	Porites sp.	Shinjo et al., 2013
1980	13.6	144.833	23.19	0.22	8.43894	7.98056	Double Reef, Guam Island	MC-ICPMS	Porites sp.	Shinjo et al., 2013
1979	13.6	144.833	23.14	0.2	8.43566	7.97352	Double Reef, Guam Island	MC-ICPMS	Porites sp.	Shinjo et al., 2013
1978	13.6	144.833	23.17	0.18	8.43763	7.97775	Double Reef, Guam Island	MC-ICPMS	Porites sp.	Shinjo et al., 2013
1977	13.6	144.833	22.86	0.16	8.4172	7.93391	Double Reef, Guam Island	MC-ICPMS	Porites sp.	Shinjo et al., 2013
1976	13.6	144.833	23.01	0.15	8.42711	7.95518	Double Reef, Guam Island	MC-ICPMS	Porites sp.	Shinjo et al., 2013
1975	13.6	144.833	23.54	0.16	8.46177	8.02955	Double Reef, Guam Island	MC-ICPMS	Porites sp.	Shinjo et al., 2013
1974	13.6	144.833	22.9	0.22	8.41985	7.93959	Double Reef, Guam Island	MC-ICPMS	Porites sp.	Shinjo et al., 2013
1973	13.6	144.833	23.02	0.25	8.42777	7.95659	Double Reef, Guam Island	MC-ICPMS	Porites sp.	Shinjo et al., 2013
1972	13.6	144.833	23.27	0.08	8.44418	7.9918	Double Reef, Guam Island	MC-ICPMS	Porites sp.	Shinjo et al., 2013
1971	13.6	144.833	23.36	0.12	8.45006	8.00441	Double Reef, Guam Island	MC-ICPMS	Porites sp.	Shinjo et al., 2013
1970	13.6	144.833	23.76	0.18	8.47602	8.06012	Double Reef, Guam Island	MC-ICPMS	Porites sp.	Shinjo et al., 2013
1969	13.6	144.833	23.06	0.15	8.4304	7.96224	Double Reef, Guam Island	MC-ICPMS	Porites sp.	Shinjo et al., 2013
1968	13.6	144.833	23.38	0.24	8.45136	8.00721	Double Reef, Guam Island	MC-ICPMS	Porites sp.	Shinjo et al., 2013
1967	13.6	144.833	22.61	0.18	8.40058	7.89823	Double Reef, Guam Island	MC-ICPMS	Porites sp.	Shinjo et al., 2013
1966	13.6	144.833	23.03	0.21	8.42843	7.958	Double Reef, Guam Island	MC-ICPMS	Porites sp.	Shinjo et al., 2013
1965	13.6	144.833	22.96	0.22	8.42381	7.9481	Double Reef, Guam Island	MC-ICPMS	Porites sp.	Shinjo et al., 2013
1964	13.6	144.833	22.69	0.2	8.40591	7.90969	Double Reef, Guam Island	MC-ICPMS	Porites sp.	Shinjo et al., 2013
1963	13.6	144.833	23.52	0.25	8.46047	8.02676	Double Reef, Guam Island	MC-ICPMS	Porites sp.	Shinjo et al., 2013
1962	13.6	144.833	23.37	0.24	8.45071	8.00581	Double Reef, Guam Island	MC-ICPMS	Porites sp.	Shinjo et al., 2013
1961	13.6	144.833	23.31	0.22	8.44679	7.99741	Double Reef, Guam Island	MC-ICPMS	Porites sp.	Shinjo et al., 2013
1960	13.6	144.833	23.5	0.2	8.45917	8.02398	Double Reef, Guam Island	MC-ICPMS	Porites sp.	Shinjo et al., 2013
1959	13.6	144.833	23.59	0.19	8.46502	8.03651	Double Reef, Guam Island	MC-ICPMS	Porites sp.	Shinjo et al., 2013
1958	13.6	144.833	22.49	0.18	8.39254	7.881	Double Reef, Guam Island	MC-ICPMS	Porites sp.	Shinjo et al., 2013
1957	13.6	144.833	22.63	0.15	8.40191	7.9011	Double Reef, Guam Island	MC-ICPMS	Porites sp.	Shinjo et al., 2013
1956	13.6	144.833	23.15	0.22	8.43632	7.97493	Double Reef, Guam Island	MC-ICPMS	Porites sp.	Shinjo et al., 2013
1955	13.6	144.833	23.13	0.2	8.43501	7.97212	Double Reef, Guam Island	MC-ICPMS	Porites sp.	Shinjo et al., 2013
1954	13.6	144.833	22.87	0.15	8.41787	7.93533	Double Reef, Guam Island	MC-ICPMS	Porites sp.	Shinjo et al., 2013
1953	13.6	144.833	23.3	0.13	8.44614	7.99601	Double Reef, Guam Island	MC-ICPMS	Porites sp.	Shinjo et al., 2013
1952	13.6	144.833	22.81	0.12	8.41389	7.9268	Double Reef, Guam Island	MC-ICPMS	Porites sp.	Shinjo et al., 2013
1951	13.6	144.833	22.76	0.25	8.41057	7.91968	Double Reef, Guam Island	MC-ICPMS	Porites sp.	Shinjo et al., 2013
1950	13.6	144.833	23.39	0.13	8.45201	8.00861	Double Reef, Guam Island	MC-ICPMS	Porites sp.	Shinjo et al., 2013
1949	13.6	144.833	22.86	0.25	8.4172	7.93391	Double Reef, Guam Island	MC-ICPMS	Porites sp.	Shinjo et al., 2013
1948	13.6	144.833	23.11	0.15	8.43369	7.9693	Double Reef, Guam Island	MC-ICPMS	Porites sp.	Shinjo et al., 2013
1947	13.6	144.833	22.81	0.23	8.41389	7.9268	Double Reef, Guam Island	MC-ICPMS	Porites sp.	Shinjo et al., 2013
1946	13.6	144.833	22.94	0.15	8.42249	7.94527	Double Reef, Guam Island	MC-ICPMS	Porites sp.	Shinjo et al., 2013
1945	13.6	144.833	23.19	0.09	8.43894	7.98056	Double Reef, Guam Island	MC-ICPMS	Porites sp.	Shinjo et al., 2013
1944	13.6	144.833	23.16	0.13	8.43697	7.97634	Double Reef, Guam Island	MC-ICPMS	Porites sp.	Shinjo et al., 2013
1943	13.6	144.833	23.59	0.15	8.46502	8.03651	Double Reef, Guam Island	MC-ICPMS	Porites sp.	Shinjo et al., 2013
1942	13.6	144.833	23.37	0.2	8.45071	8.00581	Double Reef, Guam Island	MC-ICPMS	Porites sp.	Shinjo et al., 2013
1941	13.6	144.833	23.38	0.19	8.45136	8.00721	Double Reef, Guam Island	MC-ICPMS	Porites sp.	Shinjo et al., 2013
1940	13.6	144.833	23.92	0.21	8.48633	8.08226	Double Reef, Guam Island	MC-ICPMS	Porites sp.	Shinjo et al., 2013
1940	-18.84	146.53	24.62	0.32	8.5311	8.17833	Great Barrier Reef	MC-ICPMS, PTIMS	Porites sp.	D'Olivo et al., 2015	Core HAV09_3
1941	-18.84	146.53	24.385	0.32	8.51613	8.1462	Great Barrier Reef	MC-ICPMS, PTIMS	Porites sp.	D'Olivo et al., 2015	Core HAV09_3
1942	-18.84	146.53	24.604	0.32	8.53009	8.17615	Great Barrier Reef	MC-ICPMS, PTIMS	Porites sp.	D'Olivo et al., 2015	Core HAV09_3
1943	-18.84	146.53	24.135	0.32	8.50014	8.11189	Great Barrier Reef	MC-ICPMS, PTIMS	Porites sp.	D'Olivo et al., 2015	Core HAV09_3
1944	-18.84	146.53	24.011	0.32	8.49218	8.09482	Great Barrier Reef	MC-ICPMS, PTIMS	Porites sp.	D'Olivo et al., 2015	Core HAV09_3
1945	-18.84	146.53	24.304	0.32	8.51096	8.1351	Great Barrier Reef	MC-ICPMS, PTIMS	Porites sp.	D'Olivo et al., 2015	Core HAV09_3
1946	-18.84	146.53	24.453	0.32	8.52047	8.15551	Great Barrier Reef	MC-ICPMS, PTIMS	Porites sp.	D'Olivo et al., 2015	Core HAV09_3
1947	-18.84	146.53	24.649	0.32	8.53295	8.18229	Great Barrier Reef	MC-ICPMS, PTIMS	Porites sp.	D'Olivo et al., 2015	Core HAV09_3
1948	-18.84	146.53	24.82	0.32	8.54381	8.2056	Great Barrier Reef	MC-ICPMS, PTIMS	Porites sp.	D'Olivo et al., 2015	Core HAV09_3
1949	-18.84	146.53	24.188	0.32	8.50354	8.11918	Great Barrier Reef	MC-ICPMS, PTIMS	Porites sp.	D'Olivo et al., 2015	Core HAV09_3
1950	-18.84	146.53	24.096	0.32	8.49764	8.10653	Great Barrier Reef	MC-ICPMS, PTIMS	Porites sp.	D'Olivo et al., 2015	Core HAV09_3
1951	-18.84	146.53	24.154	0.32	8.50136	8.1145	Great Barrier Reef	MC-ICPMS, PTIMS	Porites sp.	D'Olivo et al., 2015	Core HAV09_3
1952	-18.84	146.53	24.161	0.32	8.50181	8.11547	Great Barrier Reef	MC-ICPMS, PTIMS	Porites sp.	D'Olivo et al., 2015	Core HAV09_3
1953	-18.84	146.53	24.18	0.32	8.50302	8.11808	Great Barrier Reef	MC-ICPMS, PTIMS	Porites sp.	D'Olivo et al., 2015	Core HAV09_3
1954	-18.84	146.53	23.832	0.32	8.48066	8.07009	Great Barrier Reef	MC-ICPMS, PTIMS	Porites sp.	D'Olivo et al., 2015	Core HAV09_3
1955	-18.84	146.53	23.339	0.32	8.44869	8.00147	Great Barrier Reef	MC-ICPMS, PTIMS	Porites sp.	D'Olivo et al., 2015	Core HAV09_3
1956	-18.84	146.53	23.799	0.32	8.47853	8.06553	Great Barrier Reef	MC-ICPMS, PTIMS	Porites sp.	D'Olivo et al., 2015	Core HAV09_3
1957	-18.84	146.53	24.138	0.32	8.50033	8.1123	Great Barrier Reef	MC-ICPMS, PTIMS	Porites sp.	D'Olivo et al., 2015	Core HAV09_3
1958	-18.84	146.53	23.942	0.32	8.48775	8.0853	Great Barrier Reef	MC-ICPMS, PTIMS	Porites sp.	D'Olivo et al., 2015	Core HAV09_3
1959	-18.84	146.53	24.166	0.32	8.50213	8.11615	Great Barrier Reef	MC-ICPMS, PTIMS	Porites sp.	D'Olivo et al., 2015	Core HAV09_3
1960	-18.84	146.53	24.378	0.32	8.51568	8.14524	Great Barrier Reef	MC-ICPMS, PTIMS	Porites sp.	D'Olivo et al., 2015	Core HAV09_3
1961	-18.84	146.53	23.605	0.32	8.46599	8.0386	Great Barrier Reef	MC-ICPMS, PTIMS	Porites sp.	D'Olivo et al., 2015	Core HAV09_3
1962	-18.84	146.53	24.32	0.32	8.51198	8.1373	Great Barrier Reef	MC-ICPMS, PTIMS	Porites sp.	D'Olivo et al., 2015	Core HAV09_3
1963	-18.84	146.53	24.682	0.32	8.53505	8.18679	Great Barrier Reef	MC-ICPMS, PTIMS	Porites sp.	D'Olivo et al., 2015	Core HAV09_3
1964	-18.84	146.53	24.216	0.32	8.50533	8.12302	Great Barrier Reef	MC-ICPMS, PTIMS	Porites sp.	D'Olivo et al., 2015	Core HAV09_3
1965	-18.84	146.53	24.312	0.32	8.51147	8.1362	Great Barrier Reef	MC-ICPMS, PTIMS	Porites sp.	D'Olivo et al., 2015	Core HAV09_3
1966	-18.84	146.53	24.05	0.32	8.49469	8.10019	Great Barrier Reef	MC-ICPMS, PTIMS	Porites sp.	D'Olivo et al., 2015	Core HAV09_3
1967	-18.84	146.53	23.895	0.32	8.48472	8.07881	Great Barrier Reef	MC-ICPMS, PTIMS	Porites sp.	D'Olivo et al., 2015	Core HAV09_3
1968	-18.84	146.53	24.082	0.32	8.49674	8.1046	Great Barrier Reef	MC-ICPMS, PTIMS	Porites sp.	D'Olivo et al., 2015	Core HAV09_3
1969	-18.84	146.53	24.135	0.32	8.50014	8.11189	Great Barrier Reef	MC-ICPMS, PTIMS	Porites sp.	D'Olivo et al., 2015	Core HAV09_3
1970	-18.84	146.53	24.469	0.32	8.52149	8.1577	Great Barrier Reef	MC-ICPMS, PTIMS	Porites sp.	D'Olivo et al., 2015	Core HAV09_3
1971	-18.84	146.53	24.852	0.32	8.54584	8.20996	Great Barrier Reef	MC-ICPMS, PTIMS	Porites sp.	D'Olivo et al., 2015	Core HAV09_3
1972	-18.84	146.53	24.701	0.32	8.53625	8.18938	Great Barrier Reef	MC-ICPMS, PTIMS	Porites sp.	D'Olivo et al., 2015	Core HAV09_3
1973	-18.84	146.53	24.4	0.32	8.51709	8.14826	Great Barrier Reef	MC-ICPMS, PTIMS	Porites sp.	D'Olivo et al., 2015	Core HAV09_3
1974	-18.84	146.53	24.22	0.32	8.50559	8.12357	Great Barrier Reef	MC-ICPMS, PTIMS	Porites sp.	D'Olivo et al., 2015	Core HAV09_3
1975	-18.84	146.53	24.287	0.32	8.50987	8.13277	Great Barrier Reef	MC-ICPMS, PTIMS	Porites sp.	D'Olivo et al., 2015	Core HAV09_3
1976	-18.84	146.53	24.29	0.32	8.51006	8.13318	Great Barrier Reef	MC-ICPMS, PTIMS	Porites sp.	D'Olivo et al., 2015	Core HAV09_3
1977	-18.84	146.53	24.419	0.32	8.5183	8.15086	Great Barrier Reef	MC-ICPMS, PTIMS	Porites sp.	D'Olivo et al., 2015	Core HAV09_3
1978	-18.84	146.53	24.792	0.32	8.54203	8.20179	Great Barrier Reef	MC-ICPMS, PTIMS	Porites sp.	D'Olivo et al., 2015	Core HAV09_3
1979	-18.84	146.53	24.599	0.32	8.52977	8.17547	Great Barrier Reef	MC-ICPMS, PTIMS	Porites sp.	D'Olivo et al., 2015	Core HAV09_3
1980	-18.84	146.53	24.367	0.32	8.51498	8.14374	Great Barrier Reef	MC-ICPMS, PTIMS	Porites sp.	D'Olivo et al., 2015	Core HAV09_3
1981	-18.84	146.53	24.91	0.32	8.54952	8.21785	Great Barrier Reef	MC-ICPMS, PTIMS	Porites sp.	D'Olivo et al., 2015	Core HAV09_3
1982	-18.84	146.53	23.819	0.32	8.47983	8.06829	Great Barrier Reef	MC-ICPMS, PTIMS	Porites sp.	D'Olivo et al., 2015	Core HAV09_3
1983	-18.84	146.53	24.03	0.32	8.49341	8.09744	Great Barrier Reef	MC-ICPMS, PTIMS	Porites sp.	D'Olivo et al., 2015	Core HAV09_3
1984	-18.84	146.53	23.815	0.32	8.47957	8.06774	Great Barrier Reef	MC-ICPMS, PTIMS	Porites sp.	D'Olivo et al., 2015	Core HAV09_3
1985	-18.84	146.53	23.78	0.32	8.47731	8.06289	Great Barrier Reef	MC-ICPMS, PTIMS	Porites sp.	D'Olivo et al., 2015	Core HAV09_3
1986	-18.84	146.53	23.818	0.32	8.47976	8.06816	Great Barrier Reef	MC-ICPMS, PTIMS	Porites sp.	D'Olivo et al., 2015	Core HAV09_3
1987	-18.84	146.53	23.696	0.32	8.47188	8.05125	Great Barrier Reef	MC-ICPMS, PTIMS	Porites sp.	D'Olivo et al., 2015	Core HAV09_3
1988	-18.84	146.53	24.276	0.32	8.50917	8.13126	Great Barrier Reef	MC-ICPMS, PTIMS	Porites sp.	D'Olivo et al., 2015	Core HAV09_3
1989	-18.84	146.53	24.143	0.32	8.50065	8.11299	Great Barrier Reef	MC-ICPMS, PTIMS	Porites sp.	D'Olivo et al., 2015	Core HAV09_3
1990	-18.84	146.53	23.711	0.32	8.47285	8.05333	Great Barrier Reef	MC-ICPMS, PTIMS	Porites sp.	D'Olivo et al., 2015	Core HAV09_3
1991	-18.84	146.53	23.469	0.32	8.45716	8.01965	Great Barrier Reef	MC-ICPMS, PTIMS	Porites sp.	D'Olivo et al., 2015	Core HAV09_3
1992	-18.84	146.53	24.379	0.32	8.51575	8.14538	Great Barrier Reef	MC-ICPMS, PTIMS	Porites sp.	D'Olivo et al., 2015	Core HAV09_3
1993	-18.84	146.53	24.384	0.32	8.51607	8.14607	Great Barrier Reef	MC-ICPMS, PTIMS	Porites sp.	D'Olivo et al., 2015	Core HAV09_3
1994	-18.84	146.53	24.288	0.32	8.50993	8.13291	Great Barrier Reef	MC-ICPMS, PTIMS	Porites sp.	D'Olivo et al., 2015	Core HAV09_3
1995	-18.84	146.53	24.162	0.32	8.50187	8.1156	Great Barrier Reef	MC-ICPMS, PTIMS	Porites sp.	D'Olivo et al., 2015	Core HAV09_3
1996	-18.84	146.53	24.46	0.32	8.52091	8.15647	Great Barrier Reef	MC-ICPMS, PTIMS	Porites sp.	D'Olivo et al., 2015	Core HAV09_3
1997	-18.84	146.53	25.263	0.32	8.57186	8.2658	Great Barrier Reef	MC-ICPMS, PTIMS	Porites sp.	D'Olivo et al., 2015	Core HAV09_3
1998	-18.84	146.53	24.903	0.32	8.54907	8.2169	Great Barrier Reef	MC-ICPMS, PTIMS	Porites sp.	D'Olivo et al., 2015	Core HAV09_3
1999	-18.84	146.53	23.948	0.32	8.48813	8.08613	Great Barrier Reef	MC-ICPMS, PTIMS	Porites sp.	D'Olivo et al., 2015	Core HAV09_3
2000	-18.84	146.53	23.474	0.32	8.45748	8.02035	Great Barrier Reef	MC-ICPMS, PTIMS	Porites sp.	D'Olivo et al., 2015	Core HAV09_3
2001	-18.84	146.53	23.145	0.32	8.43599	7.97423	Great Barrier Reef	MC-ICPMS, PTIMS	Porites sp.	D'Olivo et al., 2015	Core HAV09_3
2002	-18.84	146.53	23.226	0.32	8.4413	7.98562	Great Barrier Reef	MC-ICPMS, PTIMS	Porites sp.	D'Olivo et al., 2015	Core HAV09_3
2003	-18.84	146.53	23.077	0.32	8.43152	7.96464	Great Barrier Reef	MC-ICPMS, PTIMS	Porites sp.	D'Olivo et al., 2015	Core HAV09_3
2004	-18.84	146.53	22.883	0.32	8.41873	7.93718	Great Barrier Reef	MC-ICPMS, PTIMS	Porites sp.	D'Olivo et al., 2015	Core HAV09_3
2005	-18.84	146.53	22.489	0.32	8.39248	7.88085	Great Barrier Reef	MC-ICPMS, PTIMS	Porites sp.	D'Olivo et al., 2015	Core HAV09_3
2006	-18.84	146.53	23.612	0.32	8.46644	8.03957	Great Barrier Reef	MC-ICPMS, PTIMS	Porites sp.	D'Olivo et al., 2015	Core HAV09_3
2007	-18.84	146.53	23.32	0.32	8.44745	7.99881	Great Barrier Reef	MC-ICPMS, PTIMS	Porites sp.	D'Olivo et al., 2015	Core HAV09_3
2008	-18.84	146.53	23.043	0.32	8.42929	7.95984	Great Barrier Reef	MC-ICPMS, PTIMS	Porites sp.	D'Olivo et al., 2015	Core HAV09_3
2009	-18.84	146.53	23.033	0.32	8.42863	7.95843	Great Barrier Reef	MC-ICPMS, PTIMS	Porites sp.	D'Olivo et al., 2015	Core HAV09_3
2005	-18.84	146.53	25.313	0.32	8.57502	8.27258	Great Barrier Reef	MC-ICPMS, PTIMS	Porites sp.	D'Olivo et al., 2015	Core HAV_06
2004	-18.84	146.53	24.948	0.32	8.55193	8.22302	Great Barrier Reef	MC-ICPMS, PTIMS	Porites sp.	D'Olivo et al., 2015	Core HAV_06
2003	-18.84	146.53	25.257	0.32	8.57148	8.26499	Great Barrier Reef	MC-ICPMS, PTIMS	Porites sp.	D'Olivo et al., 2015	Core HAV_06
2002	-18.84	146.53	24.887	0.32	8.54806	8.21472	Great Barrier Reef	MC-ICPMS, PTIMS	Porites sp.	D'Olivo et al., 2015	Core HAV_06
2001	-18.84	146.53	25.136	0.32	8.56383	8.24856	Great Barrier Reef	MC-ICPMS, PTIMS	Porites sp.	D'Olivo et al., 2015	Core HAV_06
2000	-18.84	146.53	26.271	0.32	8.6355	8.40237	Great Barrier Reef	MC-ICPMS, PTIMS	Porites sp.	D'Olivo et al., 2015	Core HAV_06
1999	-18.84	146.53	25.772	0.32	8.604	8.33477	Great Barrier Reef	MC-ICPMS, PTIMS	Porites sp.	D'Olivo et al., 2015	Core HAV_06
1998	-18.84	146.53	25.772	0.32	8.604	8.33477	Great Barrier Reef	MC-ICPMS, PTIMS	Porites sp.	D'Olivo et al., 2015	Core HAV_06
1997	-18.84	146.53	24.623	0.32	8.53129	8.17874	Great Barrier Reef	MC-ICPMS, PTIMS	Porites sp.	D'Olivo et al., 2015	Core HAV_06
1996	-18.84	146.53	24.69	0.32	8.53555	8.18788	Great Barrier Reef	MC-ICPMS, PTIMS	Porites sp.	D'Olivo et al., 2015	Core HAV_06
1995	-18.84	146.53	25.248	0.32	8.57091	8.26376	Great Barrier Reef	MC-ICPMS, PTIMS	Porites sp.	D'Olivo et al., 2015	Core HAV_06
1994	-18.84	146.53	24.32	0.32	8.51198	8.1373	Great Barrier Reef	MC-ICPMS, PTIMS	Porites sp.	D'Olivo et al., 2015	Core HAV_06
1993	-18.84	146.53	24.225	0.32	8.50591	8.12426	Great Barrier Reef	MC-ICPMS, PTIMS	Porites sp.	D'Olivo et al., 2015	Core HAV_06
1992	-18.84	146.53	24.67	0.32	8.53428	8.18516	Great Barrier Reef	MC-ICPMS, PTIMS	Porites sp.	D'Olivo et al., 2015	Core HAV_06
1991	-18.84	146.53	25.758	0.32	8.60312	8.33288	Great Barrier Reef	MC-ICPMS, PTIMS	Porites sp.	D'Olivo et al., 2015	Core HAV_06
1990	-18.84	146.53	25.427	0.32	8.58223	8.28804	Great Barrier Reef	MC-ICPMS, PTIMS	Porites sp.	D'Olivo et al., 2015	Core HAV_06
1989	-18.84	146.53	25.41	0.32	8.58115	8.28573	Great Barrier Reef	MC-ICPMS, PTIMS	Porites sp.	D'Olivo et al., 2015	Core HAV_06
1988	-18.84	146.53	24.641	0.32	8.53244	8.1812	Great Barrier Reef	MC-ICPMS, PTIMS	Porites sp.	D'Olivo et al., 2015	Core HAV_06
1987	-18.84	146.53	24.503	0.32	8.52365	8.16235	Great Barrier Reef	MC-ICPMS, PTIMS	Porites sp.	D'Olivo et al., 2015	Core HAV_06
1986	-18.84	146.53	25.224	0.32	8.5694	8.26051	Great Barrier Reef	MC-ICPMS, PTIMS	Porites sp.	D'Olivo et al., 2015	Core HAV_06
1985	-18.84	146.53	24.468	0.32	8.52142	8.15756	Great Barrier Reef	MC-ICPMS, PTIMS	Porites sp.	D'Olivo et al., 2015	Core HAV_06
1984	-18.84	146.53	25.4	0.32	8.58052	8.28438	Great Barrier Reef	MC-ICPMS, PTIMS	Porites sp.	D'Olivo et al., 2015	Core HAV_06
1983	-18.84	146.53	25.534	0.32	8.58898	8.30254	Great Barrier Reef	MC-ICPMS, PTIMS	Porites sp.	D'Olivo et al., 2015	Core HAV_06
1982	-18.84	146.53	25.801	0.32	8.60583	8.3387	Great Barrier Reef	MC-ICPMS, PTIMS	Porites sp.	D'Olivo et al., 2015	Core HAV_06
1981	-18.84	146.53	25.301	0.32	8.57426	8.27095	Great Barrier Reef	MC-ICPMS, PTIMS	Porites sp.	D'Olivo et al., 2015	Core HAV_06
1980	-18.84	146.53	24.385	0.32	8.51613	8.1462	Great Barrier Reef	MC-ICPMS, PTIMS	Porites sp.	D'Olivo et al., 2015	Core HAV_06
1979	-18.84	146.53	24.756	0.32	8.53975	8.19688	Great Barrier Reef	MC-ICPMS, PTIMS	Porites sp.	D'Olivo et al., 2015	Core HAV_06
1978	-18.84	146.53	24.834	0.32	8.5447	8.20751	Great Barrier Reef	MC-ICPMS, PTIMS	Porites sp.	D'Olivo et al., 2015	Core HAV_06
1977	-18.84	146.53	25.28	0.32	8.57294	8.26811	Great Barrier Reef	MC-ICPMS, PTIMS	Porites sp.	D'Olivo et al., 2015	Core HAV_06
1976	-18.84	146.53	25.28	0.32	8.57294	8.26811	Great Barrier Reef	MC-ICPMS, PTIMS	Porites sp.	D'Olivo et al., 2015	Core HAV_06
1975	-18.84	146.53	25.375	0.32	8.57894	8.28099	Great Barrier Reef	MC-ICPMS, PTIMS	Porites sp.	D'Olivo et al., 2015	Core HAV_06
1974	-18.84	146.53	26.267	0.32	8.63525	8.40182	Great Barrier Reef	MC-ICPMS, PTIMS	Porites sp.	D'Olivo et al., 2015	Core HAV_06
1973	-18.84	146.53	25.882	0.32	8.61095	8.34967	Great Barrier Reef	MC-ICPMS, PTIMS	Porites sp.	D'Olivo et al., 2015	Core HAV_06
1972	-18.84	146.53	25.874	0.32	8.61044	8.34859	Great Barrier Reef	MC-ICPMS, PTIMS	Porites sp.	D'Olivo et al., 2015	Core HAV_06
1971	-18.84	146.53	25.836	0.32	8.60804	8.34344	Great Barrier Reef	MC-ICPMS, PTIMS	Porites sp.	D'Olivo et al., 2015	Core HAV_06
1970	-18.84	146.53	25.097	0.32	8.56136	8.24327	Great Barrier Reef	MC-ICPMS, PTIMS	Porites sp.	D'Olivo et al., 2015	Core HAV_06
1969	-18.84	146.53	24.848	0.32	8.54559	8.20941	Great Barrier Reef	MC-ICPMS, PTIMS	Porites sp.	D'Olivo et al., 2015	Core HAV_06
1968	-18.84	146.53	24.8	0.32	8.54254	8.20287	Great Barrier Reef	MC-ICPMS, PTIMS	Porites sp.	D'Olivo et al., 2015	Core HAV_06
1967	-18.84	146.53	26.208	0.32	8.63152	8.39383	Great Barrier Reef	MC-ICPMS, PTIMS	Porites sp.	D'Olivo et al., 2015	Core HAV_06
1966	-18.84	146.53	25.756	0.32	8.60299	8.33261	Great Barrier Reef	MC-ICPMS, PTIMS	Porites sp.	D'Olivo et al., 2015	Core HAV_06
2002	-18.84	146.53	24.214	0.32	8.5052	8.12275	Great Barrier Reef	MC-ICPMS, PTIMS	Porites sp.	D'Olivo et al., 2015	Core PAN02
2001	-18.84	146.53	24.799	0.32	8.54248	8.20274	Great Barrier Reef	MC-ICPMS, PTIMS	Porites sp.	D'Olivo et al., 2015	Core PAN02
2000	-18.84	146.53	24.071	0.32	8.49604	8.10308	Great Barrier Reef	MC-ICPMS, PTIMS	Porites sp.	D'Olivo et al., 2015	Core PAN02
1999	-18.84	146.53	24.327	0.32	8.51243	8.13826	Great Barrier Reef	MC-ICPMS, PTIMS	Porites sp.	D'Olivo et al., 2015	Core PAN02
1998	-18.84	146.53	24.321	0.32	8.51204	8.13743	Great Barrier Reef	MC-ICPMS, PTIMS	Porites sp.	D'Olivo et al., 2015	Core PAN02
1997	-18.84	146.53	24.085	0.32	8.49694	8.10501	Great Barrier Reef	MC-ICPMS, PTIMS	Porites sp.	D'Olivo et al., 2015	Core PAN02
1996	-18.84	146.53	24.047	0.32	8.4945	8.09978	Great Barrier Reef	MC-ICPMS, PTIMS	Porites sp.	D'Olivo et al., 2015	Core PAN02
1995	-18.84	146.53	23.8	0.32	8.4786	8.06566	Great Barrier Reef	MC-ICPMS, PTIMS	Porites sp.	D'Olivo et al., 2015	Core PAN02
1994	-18.84	146.53	23.378	0.32	8.45123	8.00693	Great Barrier Reef	MC-ICPMS, PTIMS	Porites sp.	D'Olivo et al., 2015	Core PAN02
1993	-18.84	146.53	23.438	0.32	8.45514	8.01532	Great Barrier Reef	MC-ICPMS, PTIMS	Porites sp.	D'Olivo et al., 2015	Core PAN02
1992	-18.84	146.53	24.556	0.32	8.52703	8.16959	Great Barrier Reef	MC-ICPMS, PTIMS	Porites sp.	D'Olivo et al., 2015	Core PAN02
1991	-18.84	146.53	25.282	0.32	8.57306	8.26838	Great Barrier Reef	MC-ICPMS, PTIMS	Porites sp.	D'Olivo et al., 2015	Core PAN02
1990	-18.84	146.53	25.625	0.32	8.59473	8.31487	Great Barrier Reef	MC-ICPMS, PTIMS	Porites sp.	D'Olivo et al., 2015	Core PAN02
1989	-18.84	146.53	25.952	0.32	8.61536	8.35915	Great Barrier Reef	MC-ICPMS, PTIMS	Porites sp.	D'Olivo et al., 2015	Core PAN02
1988	-18.84	146.53	25.256	0.32	8.57142	8.26485	Great Barrier Reef	MC-ICPMS, PTIMS	Porites sp.	D'Olivo et al., 2015	Core PAN02
1987	-18.84	146.53	24.052	0.32	8.49482	8.10047	Great Barrier Reef	MC-ICPMS, PTIMS	Porites sp.	D'Olivo et al., 2015	Core PAN02
1986	-18.84	146.53	23.712	0.32	8.47292	8.05347	Great Barrier Reef	MC-ICPMS, PTIMS	Porites sp.	D'Olivo et al., 2015	Core PAN02
1985	-18.84	146.53	24.733	0.32	8.53829	8.19375	Great Barrier Reef	MC-ICPMS, PTIMS	Porites sp.	D'Olivo et al., 2015	Core PAN02
1984	-18.84	146.53	24.422	0.32	8.51849	8.15127	Great Barrier Reef	MC-ICPMS, PTIMS	Porites sp.	D'Olivo et al., 2015	Core PAN02
1983	-18.84	146.53	24.818	0.32	8.54368	8.20533	Great Barrier Reef	MC-ICPMS, PTIMS	Porites sp.	D'Olivo et al., 2015	Core PAN02
1982	-18.84	146.53	25.218	0.32	8.56902	8.25969	Great Barrier Reef	MC-ICPMS, PTIMS	Porites sp.	D'Olivo et al., 2015	Core PAN02
1981	-18.84	146.53	24.265	0.32	8.50846	8.12975	Great Barrier Reef	MC-ICPMS, PTIMS	Porites sp.	D'Olivo et al., 2015	Core PAN02
1980	-18.84	146.53	25.304	0.32	8.57445	8.27136	Great Barrier Reef	MC-ICPMS, PTIMS	Porites sp.	D'Olivo et al., 2015	Core PAN02
1979	-18.84	146.53	25.001	0.32	8.55528	8.23022	Great Barrier Reef	MC-ICPMS, PTIMS	Porites sp.	D'Olivo et al., 2015	Core PAN02
1978	-18.84	146.53	25.099	0.32	8.56149	8.24354	Great Barrier Reef	MC-ICPMS, PTIMS	Porites sp.	D'Olivo et al., 2015	Core PAN02
1977	-18.84	146.53	23.931	0.32	8.48704	8.08378	Great Barrier Reef	MC-ICPMS, PTIMS	Porites sp.	D'Olivo et al., 2015	Core PAN02
1976	-18.84	146.53	25.458	0.32	8.58418	8.29224	Great Barrier Reef	MC-ICPMS, PTIMS	Porites sp.	D'Olivo et al., 2015	Core PAN02
1975	-18.84	146.53	24.515	0.32	8.52442	8.16399	Great Barrier Reef	MC-ICPMS, PTIMS	Porites sp.	D'Olivo et al., 2015	Core PAN02
1974	-18.84	146.53	23.813	0.32	8.47944	8.06746	Great Barrier Reef	MC-ICPMS, PTIMS	Porites sp.	D'Olivo et al., 2015	Core PAN02
1973	-18.84	146.53	24.704	0.32	8.53644	8.18979	Great Barrier Reef	MC-ICPMS, PTIMS	Porites sp.	D'Olivo et al., 2015	Core PAN02
1972	-18.84	146.53	24.559	0.32	8.52722	8.17	Great Barrier Reef	MC-ICPMS, PTIMS	Porites sp.	D'Olivo et al., 2015	Core PAN02
1971	-18.84	146.53	25.169	0.32	8.56592	8.25304	Great Barrier Reef	MC-ICPMS, PTIMS	Porites sp.	D'Olivo et al., 2015	Core PAN02
1970	-18.84	146.53	23.04	0.32	8.42909	7.95942	Great Barrier Reef	MC-ICPMS, PTIMS	Porites sp.	D'Olivo et al., 2015	Core PAN02
1969	-18.84	146.53	23.633	0.32	8.4678	8.04249	Great Barrier Reef	MC-ICPMS, PTIMS	Porites sp.	D'Olivo et al., 2015	Core PAN02
1968	-18.84	146.53	25.042	0.32	8.55788	8.2358	Great Barrier Reef	MC-ICPMS, PTIMS	Porites sp.	D'Olivo et al., 2015	Core PAN02
1967	-18.84	146.53	24.197	0.32	8.50411	8.12041	Great Barrier Reef	MC-ICPMS, PTIMS	Porites sp.	D'Olivo et al., 2015	Core PAN02
1966	-18.84	146.53	24.305	0.32	8.51102	8.13524	Great Barrier Reef	MC-ICPMS, PTIMS	Porites sp.	D'Olivo et al., 2015	Core PAN02
1965	-18.84	146.53	25.168	0.32	8.56585	8.25291	Great Barrier Reef	MC-ICPMS, PTIMS	Porites sp.	D'Olivo et al., 2015	Core PAN02
1964	-18.84	146.53	23.609	0.32	8.46625	8.03916	Great Barrier Reef	MC-ICPMS, PTIMS	Porites sp.	D'Olivo et al., 2015	Core PAN02
1963	-18.84	146.53	24.931	0.32	8.55085	8.22071	Great Barrier Reef	MC-ICPMS, PTIMS	Porites sp.	D'Olivo et al., 2015	Core PAN02
2009	-18.84	146.53	23.695	0.32	8.47182	8.05111	Great Barrier Reef	MC-ICPMS, PTIMS	Porites sp.	D'Olivo et al., 2015	Core RIB09_3
2008	-18.84	146.53	24.153	0.32	8.5013	8.11437	Great Barrier Reef	MC-ICPMS, PTIMS	Porites sp.	D'Olivo et al., 2015	Core RIB09_3
2007	-18.84	146.53	23.989	0.32	8.49077	8.09178	Great Barrier Reef	MC-ICPMS, PTIMS	Porites sp.	D'Olivo et al., 2015	Core RIB09_3
2006	-18.84	146.53	24.142	0.32	8.50059	8.11285	Great Barrier Reef	MC-ICPMS, PTIMS	Porites sp.	D'Olivo et al., 2015	Core RIB09_3
2005	-18.84	146.53	23.27	0.32	8.44418	7.9918	Great Barrier Reef	MC-ICPMS, PTIMS	Porites sp.	D'Olivo et al., 2015	Core RIB09_3
2004	-18.84	146.53	23.382	0.32	8.45149	8.00749	Great Barrier Reef	MC-ICPMS, PTIMS	Porites sp.	D'Olivo et al., 2015	Core RIB09_3
2003	-18.84	146.53	23.296	0.32	8.44588	7.99545	Great Barrier Reef	MC-ICPMS, PTIMS	Porites sp.	D'Olivo et al., 2015	Core RIB09_3
2002	-18.84	146.53	23.992	0.32	8.49096	8.0922	Great Barrier Reef	MC-ICPMS, PTIMS	Porites sp.	D'Olivo et al., 2015	Core RIB09_3
2001	-18.84	146.53	23.542	0.32	8.4619	8.02983	Great Barrier Reef	MC-ICPMS, PTIMS	Porites sp.	D'Olivo et al., 2015	Core RIB09_3
2000	-18.84	146.53	23.457	0.32	8.45638	8.01798	Great Barrier Reef	MC-ICPMS, PTIMS	Porites sp.	D'Olivo et al., 2015	Core RIB09_3
1999	-18.84	146.53	24.228	0.32	8.5061	8.12467	Great Barrier Reef	MC-ICPMS, PTIMS	Porites sp.	D'Olivo et al., 2015	Core RIB09_3
1998	-18.84	146.53	23.818	0.32	8.47976	8.06816	Great Barrier Reef	MC-ICPMS, PTIMS	Porites sp.	D'Olivo et al., 2015	Core RIB09_3
1997	-18.84	146.53	24.12	0.32	8.49918	8.10983	Great Barrier Reef	MC-ICPMS, PTIMS	Porites sp.	D'Olivo et al., 2015	Core RIB09_3
1996	-18.84	146.53	23.753	0.32	8.47556	8.05915	Great Barrier Reef	MC-ICPMS, PTIMS	Porites sp.	D'Olivo et al., 2015	Core RIB09_3
1995	-18.84	146.53	24.289	0.32	8.51	8.13304	Great Barrier Reef	MC-ICPMS, PTIMS	Porites sp.	D'Olivo et al., 2015	Core RIB09_3
1994	-18.84	146.53	24.698	0.32	8.53606	8.18897	Great Barrier Reef	MC-ICPMS, PTIMS	Porites sp.	D'Olivo et al., 2015	Core RIB09_3
1993	-18.84	146.53	24.21	0.32	8.50495	8.1222	Great Barrier Reef	MC-ICPMS, PTIMS	Porites sp.	D'Olivo et al., 2015	Core RIB09_3
1992	-18.84	146.53	24.253	0.32	8.5077	8.1281	Great Barrier Reef	MC-ICPMS, PTIMS	Porites sp.	D'Olivo et al., 2015	Core RIB09_3
1991	-18.84	146.53	23.927	0.32	8.48678	8.08323	Great Barrier Reef	MC-ICPMS, PTIMS	Porites sp.	D'Olivo et al., 2015	Core RIB09_3
1990	-18.84	146.53	24.692	0.32	8.53568	8.18816	Great Barrier Reef	MC-ICPMS, PTIMS	Porites sp.	D'Olivo et al., 2015	Core RIB09_3
1989	-18.84	146.53	24.477	0.32	8.522	8.15879	Great Barrier Reef	MC-ICPMS, PTIMS	Porites sp.	D'Olivo et al., 2015	Core RIB09_3
1988	-18.84	146.53	24.29	0.32	8.51006	8.13318	Great Barrier Reef	MC-ICPMS, PTIMS	Porites sp.	D'Olivo et al., 2015	Core RIB09_3
1987	-18.84	146.53	23.908	0.32	8.48556	8.0806	Great Barrier Reef	MC-ICPMS, PTIMS	Porites sp.	D'Olivo et al., 2015	Core RIB09_3
1986	-18.84	146.53	23.977	0.32	8.49	8.09013	Great Barrier Reef	MC-ICPMS, PTIMS	Porites sp.	D'Olivo et al., 2015	Core RIB09_3
1985	-18.84	146.53	24.507	0.32	8.52391	8.1629	Great Barrier Reef	MC-ICPMS, PTIMS	Porites sp.	D'Olivo et al., 2015	Core RIB09_3
1984	-18.84	146.53	24.536	0.32	8.52576	8.16686	Great Barrier Reef	MC-ICPMS, PTIMS	Porites sp.	D'Olivo et al., 2015	Core RIB09_3
1983	-18.84	146.53	23.915	0.32	8.48601	8.08157	Great Barrier Reef	MC-ICPMS, PTIMS	Porites sp.	D'Olivo et al., 2015	Core RIB09_3
1982	-18.84	146.53	23.753	0.32	8.47556	8.05915	Great Barrier Reef	MC-ICPMS, PTIMS	Porites sp.	D'Olivo et al., 2015	Core RIB09_3
1981	-18.84	146.53	23.578	0.32	8.46424	8.03484	Great Barrier Reef	MC-ICPMS, PTIMS	Porites sp.	D'Olivo et al., 2015	Core RIB09_3
1980	-18.84	146.53	23.727	0.32	8.47388	8.05555	Great Barrier Reef	MC-ICPMS, PTIMS	Porites sp.	D'Olivo et al., 2015	Core RIB09_3
1979	-18.84	146.53	24.303	0.32	8.51089	8.13496	Great Barrier Reef	MC-ICPMS, PTIMS	Porites sp.	D'Olivo et al., 2015	Core RIB09_3
1978	-18.84	146.53	24.455	0.32	8.5206	8.15578	Great Barrier Reef	MC-ICPMS, PTIMS	Porites sp.	D'Olivo et al., 2015	Core RIB09_3
1977	-18.84	146.53	24.716	0.32	8.53721	8.19143	Great Barrier Reef	MC-ICPMS, PTIMS	Porites sp.	D'Olivo et al., 2015	Core RIB09_3
1976	-18.84	146.53	24.889	0.32	8.54819	8.21499	Great Barrier Reef	MC-ICPMS, PTIMS	Porites sp.	D'Olivo et al., 2015	Core RIB09_3
1975	-18.84	146.53	24.198	0.32	8.50418	8.12055	Great Barrier Reef	MC-ICPMS, PTIMS	Porites sp.	D'Olivo et al., 2015	Core RIB09_3
1974	-18.84	146.53	25.411	0.32	8.58121	8.28587	Great Barrier Reef	MC-ICPMS, PTIMS	Porites sp.	D'Olivo et al., 2015	Core RIB09_3
1973	-18.84	146.53	24.475	0.32	8.52187	8.15852	Great Barrier Reef	MC-ICPMS, PTIMS	Porites sp.	D'Olivo et al., 2015	Core RIB09_3
1972	-18.84	146.53	24.604	0.32	8.53009	8.17615	Great Barrier Reef	MC-ICPMS, PTIMS	Porites sp.	D'Olivo et al., 2015	Core RIB09_3
1971	-18.84	146.53	24.657	0.32	8.53346	8.18338	Great Barrier Reef	MC-ICPMS, PTIMS	Porites sp.	D'Olivo et al., 2015	Core RIB09_3
1970	-18.84	146.53	24.129	0.32	8.49976	8.11107	Great Barrier Reef	MC-ICPMS, PTIMS	Porites sp.	D'Olivo et al., 2015	Core RIB09_3
1969	-18.84	146.53	24.729	0.32	8.53803	8.1932	Great Barrier Reef	MC-ICPMS, PTIMS	Porites sp.	D'Olivo et al., 2015	Core RIB09_3
1968	-18.84	146.53	24.005	0.32	8.4918	8.09399	Great Barrier Reef	MC-ICPMS, PTIMS	Porites sp.	D'Olivo et al., 2015	Core RIB09_3
1967	-18.84	146.53	24.058	0.32	8.4952	8.10129	Great Barrier Reef	MC-ICPMS, PTIMS	Porites sp.	D'Olivo et al., 2015	Core RIB09_3
1966	-18.84	146.53	23.114	0.32	8.43395	7.96986	Great Barrier Reef	MC-ICPMS, PTIMS	Porites sp.	D'Olivo et al., 2015	Core RIB09_3
1965	-18.84	146.53	23.627	0.32	8.46741	8.04166	Great Barrier Reef	MC-ICPMS, PTIMS	Porites sp.	D'Olivo et al., 2015	Core RIB09_3
1964	-18.84	146.53	24.037	0.32	8.49385	8.0984	Great Barrier Reef	MC-ICPMS, PTIMS	Porites sp.	D'Olivo et al., 2015	Core RIB09_3
1962	-18.84	146.53	23.564	0.32	8.46333	8.03289	Great Barrier Reef	MC-ICPMS, PTIMS	Porites sp.	D'Olivo et al., 2015	Core RIB09_3
1961	-18.84	146.53	23.839	0.32	8.48111	8.07106	Great Barrier Reef	MC-ICPMS, PTIMS	Porites sp.	D'Olivo et al., 2015	Core RIB09_3
2009	-18.84	146.53	23.071	0.32	8.43113	7.96379	Great Barrier Reef	MC-ICPMS, PTIMS	Porites sp.	D'Olivo et al., 2015	Core 1709_6
2008	-18.84	146.53	22.971	0.32	8.42454	7.94966	Great Barrier Reef	MC-ICPMS, PTIMS	Porites sp.	D'Olivo et al., 2015	Core 1709_6
2007	-18.84	146.53	22.909	0.32	8.42045	7.94087	Great Barrier Reef	MC-ICPMS, PTIMS	Porites sp.	D'Olivo et al., 2015	Core 1709_6
2006	-18.84	146.53	23.266	0.32	8.44392	7.99124	Great Barrier Reef	MC-ICPMS, PTIMS	Porites sp.	D'Olivo et al., 2015	Core 1709_6
2005	-18.84	146.53	22.883	0.32	8.41873	7.93718	Great Barrier Reef	MC-ICPMS, PTIMS	Porites sp.	D'Olivo et al., 2015	Core 1709_6
2004	-18.84	146.53	22.901	0.32	8.41992	7.93973	Great Barrier Reef	MC-ICPMS, PTIMS	Porites sp.	D'Olivo et al., 2015	Core 1709_6
2003	-18.84	146.53	22.862	0.32	8.41734	7.9342	Great Barrier Reef	MC-ICPMS, PTIMS	Porites sp.	D'Olivo et al., 2015	Core 1709_6
2002	-18.84	146.53	22.906	0.32	8.42025	7.94044	Great Barrier Reef	MC-ICPMS, PTIMS	Porites sp.	D'Olivo et al., 2015	Core 1709_6
2001	-18.84	146.53	22.661	0.32	8.40398	7.90554	Great Barrier Reef	MC-ICPMS, PTIMS	Porites sp.	D'Olivo et al., 2015	Core 1709_6
2000	-18.84	146.53	23.04	0.32	8.42909	7.95942	Great Barrier Reef	MC-ICPMS, PTIMS	Porites sp.	D'Olivo et al., 2015	Core 1709_6
1999	-18.84	146.53	23.021	0.32	8.42784	7.95673	Great Barrier Reef	MC-ICPMS, PTIMS	Porites sp.	D'Olivo et al., 2015	Core 1709_6
1998	-18.84	146.53	22.874	0.32	8.41813	7.9359	Great Barrier Reef	MC-ICPMS, PTIMS	Porites sp.	D'Olivo et al., 2015	Core 1709_6
1997	-18.84	146.53	23.239	0.32	8.44215	7.98745	Great Barrier Reef	MC-ICPMS, PTIMS	Porites sp.	D'Olivo et al., 2015	Core 1709_6
1996	-18.84	146.53	23.431	0.32	8.45468	8.01434	Great Barrier Reef	MC-ICPMS, PTIMS	Porites sp.	D'Olivo et al., 2015	Core 1709_6
1995	-18.84	146.53	22.722	0.32	8.40804	7.91426	Great Barrier Reef	MC-ICPMS, PTIMS	Porites sp.	D'Olivo et al., 2015	Core 1709_6
1994	-18.84	146.53	23.323	0.32	8.44764	7.99923	Great Barrier Reef	MC-ICPMS, PTIMS	Porites sp.	D'Olivo et al., 2015	Core 1709_6
1993	-18.84	146.53	23.073	0.32	8.43126	7.96408	Great Barrier Reef	MC-ICPMS, PTIMS	Porites sp.	D'Olivo et al., 2015	Core 1709_6
1992	-18.84	146.53	22.747	0.32	8.40971	7.91782	Great Barrier Reef	MC-ICPMS, PTIMS	Porites sp.	D'Olivo et al., 2015	Core 1709_6
1991	-18.84	146.53	23.384	0.32	8.45162	8.00777	Great Barrier Reef	MC-ICPMS, PTIMS	Porites sp.	D'Olivo et al., 2015	Core 1709_6
1990	-18.84	146.53	24.128	0.32	8.49969	8.11093	Great Barrier Reef	MC-ICPMS, PTIMS	Porites sp.	D'Olivo et al., 2015	Core 1709_6
1989	-18.84	146.53	23.418	0.32	8.45384	8.01253	Great Barrier Reef	MC-ICPMS, PTIMS	Porites sp.	D'Olivo et al., 2015	Core 1709_6
1988	-18.84	146.53	23.405	0.32	8.45299	8.01071	Great Barrier Reef	MC-ICPMS, PTIMS	Porites sp.	D'Olivo et al., 2015	Core 1709_6
1987	-18.84	146.53	23.631	0.32	8.46767	8.04222	Great Barrier Reef	MC-ICPMS, PTIMS	Porites sp.	D'Olivo et al., 2015	Core 1709_6
1986	-18.84	146.53	23.382	0.32	8.45149	8.00749	Great Barrier Reef	MC-ICPMS, PTIMS	Porites sp.	D'Olivo et al., 2015	Core 1709_6
1985	-18.84	146.53	23.228	0.32	8.44143	7.9859	Great Barrier Reef	MC-ICPMS, PTIMS	Porites sp.	D'Olivo et al., 2015	Core 1709_6
1984	-18.84	146.53	23.316	0.32	8.44719	7.99825	Great Barrier Reef	MC-ICPMS, PTIMS	Porites sp.	D'Olivo et al., 2015	Core 1709_6
1983	-18.84	146.53	22.95	0.32	8.42315	7.94668	Great Barrier Reef	MC-ICPMS, PTIMS	Porites sp.	D'Olivo et al., 2015	Core 1709_6
1982	-18.84	146.53	22.991	0.32	8.42586	7.95249	Great Barrier Reef	MC-ICPMS, PTIMS	Porites sp.	D'Olivo et al., 2015	Core 1709_6
1981	-18.84	146.53	22.782	0.32	8.41203	7.92281	Great Barrier Reef	MC-ICPMS, PTIMS	Porites sp.	D'Olivo et al., 2015	Core 1709_6
1980	-18.84	146.53	22.515	0.32	8.39422	7.88459	Great Barrier Reef	MC-ICPMS, PTIMS	Porites sp.	D'Olivo et al., 2015	Core 1709_6
1979	-18.84	146.53	22.9	0.32	8.41985	7.93959	Great Barrier Reef	MC-ICPMS, PTIMS	Porites sp.	D'Olivo et al., 2015	Core 1709_6
1978	-18.84	146.53	22.731	0.32	8.40864	7.91554	Great Barrier Reef	MC-ICPMS, PTIMS	Porites sp.	D'Olivo et al., 2015	Core 1709_6
1977	-18.84	146.53	23.159	0.32	8.43691	7.9762	Great Barrier Reef	MC-ICPMS, PTIMS	Porites sp.	D'Olivo et al., 2015	Core 1709_6
1976	-18.84	146.53	23.033	0.32	8.42863	7.95843	Great Barrier Reef	MC-ICPMS, PTIMS	Porites sp.	D'Olivo et al., 2015	Core 1709_6
1975	-18.84	146.53	22.947	0.32	8.42296	7.94626	Great Barrier Reef	MC-ICPMS, PTIMS	Porites sp.	D'Olivo et al., 2015	Core 1709_6
1974	-18.84	146.53	23.773	0.32	8.47686	8.06192	Great Barrier Reef	MC-ICPMS, PTIMS	Porites sp.	D'Olivo et al., 2015	Core 1709_6
1973	-18.84	146.53	23.64	0.32	8.46826	8.04347	Great Barrier Reef	MC-ICPMS, PTIMS	Porites sp.	D'Olivo et al., 2015	Core 1709_6
2011	19.286	110.656	24.77	0.12	8.54064	8.19879	Hainan Island, South China Sea	PTIMS	Porites sp.	Wei et al., 2015
2010	19.286	110.656	21.19	0.12	8.30282	7.68845	Hainan Island, South China Sea	PTIMS	Porites sp.	Wei et al., 2015
2009	19.286	110.656	22	0.1	8.35935	7.80976	Hainan Island, South China Sea	PTIMS	Porites sp.	Wei et al., 2015
2008	19.286	110.656	23.56	0.08	8.46307	8.03234	Hainan Island, South China Sea	PTIMS	Porites sp.	Wei et al., 2015
2007	19.286	110.656	22.98	0.08	8.42513	7.95093	Hainan Island, South China Sea	PTIMS	Porites sp.	Wei et al., 2015
2006	19.286	110.656	23.29	0.08	8.44549	7.99461	Hainan Island, South China Sea	PTIMS	Porites sp.	Wei et al., 2015
2005	19.286	110.656	24.72	0.08	8.53746	8.19197	Hainan Island, South China Sea	PTIMS	Porites sp.	Wei et al., 2015
2004	19.286	110.656	23.13	0.08	8.43501	7.97212	Hainan Island, South China Sea	PTIMS	Porites sp.	Wei et al., 2015
2003	19.286	110.656	24.19	0.1	8.50367	8.11945	Hainan Island, South China Sea	PTIMS	Porites sp.	Wei et al., 2015
2002	19.286	110.656	22.18	0.14	8.37162	7.83609	Hainan Island, South China Sea	PTIMS	Porites sp.	Wei et al., 2015
2001	19.286	110.656	23.52	0.1	8.46047	8.02676	Hainan Island, South China Sea	PTIMS	Porites sp.	Wei et al., 2015
2000	19.286	110.656	23.16	0.1	8.43697	7.97634	Hainan Island, South China Sea	PTIMS	Porites sp.	Wei et al., 2015
1999	19.286	110.656	22.34	0.12	8.38245	7.85934	Hainan Island, South China Sea	PTIMS	Porites sp.	Wei et al., 2015
1998	19.286	110.656	22.49	0.1	8.39254	7.881	Hainan Island, South China Sea	PTIMS	Porites sp.	Wei et al., 2015
1997	19.286	110.656	21.41	0.12	8.3184	7.72189	Hainan Island, South China Sea	PTIMS	Porites sp.	Wei et al., 2015
1996	19.286	110.656	21.91	0.08	8.35317	7.79651	Hainan Island, South China Sea	PTIMS	Porites sp.	Wei et al., 2015
1995	19.286	110.656	22.13	0.08	8.36822	7.8288	Hainan Island, South China Sea	PTIMS	Porites sp.	Wei et al., 2015
1994	19.286	110.656	22.13	0.08	8.36822	7.8288	Hainan Island, South China Sea	PTIMS	Porites sp.	Wei et al., 2015
1993	19.286	110.656	22.56	0.08	8.39723	7.89106	Hainan Island, South China Sea	PTIMS	Porites sp.	Wei et al., 2015
1992	19.286	110.656	23.5	0.1	8.45917	8.02398	Hainan Island, South China Sea	PTIMS	Porites sp.	Wei et al., 2015
1991	19.286	110.656	24.67	0.12	8.53428	8.18516	Hainan Island, South China Sea	PTIMS	Porites sp.	Wei et al., 2015
1990	19.286	110.656	23.21	0.1	8.44025	7.98337	Hainan Island, South China Sea	PTIMS	Porites sp.	Wei et al., 2015
1989	19.286	110.656	22.88	0.1	8.41853	7.93675	Hainan Island, South China Sea	PTIMS	Porites sp.	Wei et al., 2015
1988	19.286	110.656	24.57	0.1	8.52792	8.17151	Hainan Island, South China Sea	PTIMS	Porites sp.	Wei et al., 2015
1987	19.286	110.656	26	0.1	8.61839	8.36565	Hainan Island, South China Sea	PTIMS	Porites sp.	Wei et al., 2015
1986	19.286	110.656	24.54	0.08	8.52601	8.16741	Hainan Island, South China Sea	PTIMS	Porites sp.	Wei et al., 2015
1985	19.286	110.656	25.36	0.1	8.57799	8.27895	Hainan Island, South China Sea	PTIMS	Porites sp.	Wei et al., 2015
1984	19.286	110.656	23.6	0.1	8.46566	8.03791	Hainan Island, South China Sea	PTIMS	Porites sp.	Wei et al., 2015
1983	19.286	110.656	24.22	0.08	8.50559	8.12357	Hainan Island, South China Sea	PTIMS	Porites sp.	Wei et al., 2015
1982	19.286	110.656	23.79	0.1	8.47795	8.06428	Hainan Island, South China Sea	PTIMS	Porites sp.	Wei et al., 2015
1981	19.286	110.656	25.23	0.06	8.56978	8.26132	Hainan Island, South China Sea	PTIMS	Porites sp.	Wei et al., 2015
1980	19.286	110.656	25.49	0.1	8.5862	8.29658	Hainan Island, South China Sea	PTIMS	Porites sp.	Wei et al., 2015
1979	19.286	110.656	24.93	0.08	8.55079	8.22057	Hainan Island, South China Sea	PTIMS	Porites sp.	Wei et al., 2015
1978	19.286	110.656	20.88	0.1	8.28053	7.64063	Hainan Island, South China Sea	PTIMS	Porites sp.	Wei et al., 2015
1977	19.286	110.656	21.45	0.08	8.32121	7.72793	Hainan Island, South China Sea	PTIMS	Porites sp.	Wei et al., 2015
1976	19.286	110.656	23.37	0.34	8.45071	8.00581	Hainan Island, South China Sea	PTIMS	Porites sp.	Wei et al., 2015
1975	19.286	110.656	22.78	0.32	8.4119	7.92253	Hainan Island, South China Sea	PTIMS	Porites sp.	Wei et al., 2015
1974	19.286	110.656	22.92	0.14	8.42117	7.94243	Hainan Island, South China Sea	PTIMS	Porites sp.	Wei et al., 2015
1973	19.286	110.656	23.1	0.12	8.43303	7.96789	Hainan Island, South China Sea	PTIMS	Porites sp.	Wei et al., 2015
1972	19.286	110.656	22.57	0.1	8.3979	7.8925	Hainan Island, South China Sea	PTIMS	Porites sp.	Wei et al., 2015
1971	19.286	110.656	23.08	0.16	8.43172	7.96506	Hainan Island, South China Sea	PTIMS	Porites sp.	Wei et al., 2015
1970	19.286	110.656	21.64	0.34	8.3345	7.75644	Hainan Island, South China Sea	PTIMS	Porites sp.	Wei et al., 2015
1969	19.286	110.656	24.39	0.12	8.51645	8.14689	Hainan Island, South China Sea	PTIMS	Porites sp.	Wei et al., 2015
1968	19.286	110.656	23.69	0.06	8.47149	8.05041	Hainan Island, South China Sea	PTIMS	Porites sp.	Wei et al., 2015
1967	19.286	110.656	24.02	0.12	8.49276	8.09606	Hainan Island, South China Sea	PTIMS	Porites sp.	Wei et al., 2015
1966	19.286	110.656	23.01	0.18	8.42711	7.95518	Hainan Island, South China Sea	PTIMS	Porites sp.	Wei et al., 2015
1965	19.286	110.656	24.74	0.08	8.53873	8.1947	Hainan Island, South China Sea	PTIMS	Porites sp.	Wei et al., 2015
1964	19.286	110.656	22.22	0.12	8.37433	7.84192	Hainan Island, South China Sea	PTIMS	Porites sp.	Wei et al., 2015
1963	19.286	110.656	23.94	0.26	8.48762	8.08502	Hainan Island, South China Sea	PTIMS	Porites sp.	Wei et al., 2015
1962	19.286	110.656	22.51	0.28	8.39389	7.88387	Hainan Island, South China Sea	PTIMS	Porites sp.	Wei et al., 2015
1961	19.286	110.656	21.39	0.5	8.31699	7.71887	Hainan Island, South China Sea	PTIMS	Porites sp.	Wei et al., 2015
1960	19.286	110.656	22.51	0.2	8.39389	7.88387	Hainan Island, South China Sea	PTIMS	Porites sp.	Wei et al., 2015
1959	19.286	110.656	21.97	0.3	8.35729	7.80535	Hainan Island, South China Sea	PTIMS	Porites sp.	Wei et al., 2015
1958	19.286	110.656	22.47	0.2	8.3912	7.87812	Hainan Island, South China Sea	PTIMS	Porites sp.	Wei et al., 2015
1957	19.286	110.656	24.15	0.04	8.5011	8.11395	Hainan Island, South China Sea	PTIMS	Porites sp.	Wei et al., 2015
1956	19.286	110.656	23.32	0.16	8.44745	7.99881	Hainan Island, South China Sea	PTIMS	Porites sp.	Wei et al., 2015
1955	19.286	110.656	23.21	0.16	8.44025	7.98337	Hainan Island, South China Sea	PTIMS	Porites sp.	Wei et al., 2015
1954	19.286	110.656	23.46	0.32	8.45657	8.01839	Hainan Island, South China Sea	PTIMS	Porites sp.	Wei et al., 2015
1953	19.286	110.656	22.92	0.16	8.42117	7.94243	Hainan Island, South China Sea	PTIMS	Porites sp.	Wei et al., 2015
1952	19.286	110.656	23.73	0.08	8.47408	8.05596	Hainan Island, South China Sea	PTIMS	Porites sp.	Wei et al., 2015
1951	19.286	110.656	22.22	0.04	8.37433	7.84192	Hainan Island, South China Sea	PTIMS	Porites sp.	Wei et al., 2015
1950	19.286	110.656	24.77	0.14	8.54064	8.19879	Hainan Island, South China Sea	PTIMS	Porites sp.	Wei et al., 2015
1949	19.286	110.656	24.56	0.34	8.52728	8.17014	Hainan Island, South China Sea	PTIMS	Porites sp.	Wei et al., 2015
1948	19.286	110.656	23.82	0.14	8.47989	8.06843	Hainan Island, South China Sea	PTIMS	Porites sp.	Wei et al., 2015
1947	19.286	110.656	23.82	0.02	8.47989	8.06843	Hainan Island, South China Sea	PTIMS	Porites sp.	Wei et al., 2015
1946	19.286	110.656	24.21	0.34	8.50495	8.1222	Hainan Island, South China Sea	PTIMS	Porites sp.	Wei et al., 2015
1945	19.286	110.656	24.09	0.1	8.49726	8.1057	Hainan Island, South China Sea	PTIMS	Porites sp.	Wei et al., 2015
1944	19.286	110.656	21.94	0.16	8.35523	7.80093	Hainan Island, South China Sea	PTIMS	Porites sp.	Wei et al., 2015
1943	19.286	110.656	22.31	0.12	8.38043	7.85499	Hainan Island, South China Sea	PTIMS	Porites sp.	Wei et al., 2015
1942	19.286	110.656	23.22	0.04	8.44091	7.98478	Hainan Island, South China Sea	PTIMS	Porites sp.	Wei et al., 2015
1941	19.286	110.656	22.37	0.2	8.38447	7.86368	Hainan Island, South China Sea	PTIMS	Porites sp.	Wei et al., 2015
1940	19.286	110.656	24.19	0.24	8.50367	8.11945	Hainan Island, South China Sea	PTIMS	Porites sp.	Wei et al., 2015
1939	19.286	110.656	24.78	0.12	8.54127	8.20015	Hainan Island, South China Sea	PTIMS	Porites sp.	Wei et al., 2015
1938	19.286	110.656	24.48	0.06	8.52219	8.1592	Hainan Island, South China Sea	PTIMS	Porites sp.	Wei et al., 2015
1937	19.286	110.656	23.78	0.08	8.47731	8.06289	Hainan Island, South China Sea	PTIMS	Porites sp.	Wei et al., 2015
1936	19.286	110.656	24.53	0.04	8.52537	8.16604	Hainan Island, South China Sea	PTIMS	Porites sp.	Wei et al., 2015
1935	19.286	110.656	24.1	0.14	8.4979	8.10708	Hainan Island, South China Sea	PTIMS	Porites sp.	Wei et al., 2015
1934	19.286	110.656	25.35	0.7	8.57736	8.2776	Hainan Island, South China Sea	PTIMS	Porites sp.	Wei et al., 2015
1933	19.286	110.656	24.21	0.1	8.50495	8.1222	Hainan Island, South China Sea	PTIMS	Porites sp.	Wei et al., 2015
1932	19.286	110.656	23.86	0.26	8.48247	8.07397	Hainan Island, South China Sea	PTIMS	Porites sp.	Wei et al., 2015
1931	19.286	110.656	22.19	0.02	8.3723	7.83755	Hainan Island, South China Sea	PTIMS	Porites sp.	Wei et al., 2015
1930	19.286	110.656	20.82	0.32	8.27617	7.63127	Hainan Island, South China Sea	PTIMS	Porites sp.	Wei et al., 2015
1929	19.286	110.656	22.53	0.12	8.39523	7.88675	Hainan Island, South China Sea	PTIMS	Porites sp.	Wei et al., 2015
1928	19.286	110.656	21.78	0.04	8.34421	7.77728	Hainan Island, South China Sea	PTIMS	Porites sp.	Wei et al., 2015
1927	19.286	110.656	22.05	0.1	8.36277	7.81709	Hainan Island, South China Sea	PTIMS	Porites sp.	Wei et al., 2015
1926	19.286	110.656	22.74	0.2	8.40924	7.91683	Hainan Island, South China Sea	PTIMS	Porites sp.	Wei et al., 2015
1925	19.286	110.656	22.69	0.32	8.40591	7.90969	Hainan Island, South China Sea	PTIMS	Porites sp.	Wei et al., 2015
1924	19.286	110.656	22.86	0.02	8.4172	7.93391	Hainan Island, South China Sea	PTIMS	Porites sp.	Wei et al., 2015
1923	19.286	110.656	24.64	0.22	8.53237	8.18106	Hainan Island, South China Sea	PTIMS	Porites sp.	Wei et al., 2015
1922	19.286	110.656	23.91	0.14	8.48569	8.08088	Hainan Island, South China Sea	PTIMS	Porites sp.	Wei et al., 2015
1921	19.286	110.656	23.81	0.24	8.47924	8.06705	Hainan Island, South China Sea	PTIMS	Porites sp.	Wei et al., 2015
1920	19.286	110.656	23.38	0.14	8.45136	8.00721	Hainan Island, South China Sea	PTIMS	Porites sp.	Wei et al., 2015
1919	19.286	110.656	24.24	0.1	8.50687	8.12632	Hainan Island, South China Sea	PTIMS	Porites sp.	Wei et al., 2015
1918	19.286	110.656	24.08	0.1	8.49661	8.10432	Hainan Island, South China Sea	PTIMS	Porites sp.	Wei et al., 2015
1917	19.286	110.656	24.99	0.26	8.55459	8.22873	Hainan Island, South China Sea	PTIMS	Porites sp.	Wei et al., 2015
1916	19.286	110.656	23.65	0.06	8.4689	8.04486	Hainan Island, South China Sea	PTIMS	Porites sp.	Wei et al., 2015
1915	19.286	110.656	24.34	0.14	8.51326	8.14004	Hainan Island, South China Sea	PTIMS	Porites sp.	Wei et al., 2015
1914	19.286	110.656	22.75	0.34	8.40991	7.91825	Hainan Island, South China Sea	PTIMS	Porites sp.	Wei et al., 2015
1913	19.286	110.656	22.93	0.2	8.42183	7.94385	Hainan Island, South China Sea	PTIMS	Porites sp.	Wei et al., 2015
1912	19.286	110.656	23.19	0.06	8.43894	7.98056	Hainan Island, South China Sea	PTIMS	Porites sp.	Wei et al., 2015
1911	19.286	110.656	23.31	0.06	8.44679	7.99741	Hainan Island, South China Sea	PTIMS	Porites sp.	Wei et al., 2015
1910	19.286	110.656	23.87	0	8.48311	8.07535	Hainan Island, South China Sea	PTIMS	Porites sp.	Wei et al., 2015
1909	19.286	110.656	23.49	0.48	8.45852	8.02258	Hainan Island, South China Sea	PTIMS	Porites sp.	Wei et al., 2015
1908	19.286	110.656	22.97	0.12	8.42447	7.94952	Hainan Island, South China Sea	PTIMS	Porites sp.	Wei et al., 2015
1907	19.286	110.656	22.43	0.32	8.38851	7.87235	Hainan Island, South China Sea	PTIMS	Porites sp.	Wei et al., 2015
1906	19.286	110.656	22.9	0.02	8.41985	7.93959	Hainan Island, South China Sea	PTIMS	Porites sp.	Wei et al., 2015
1905	19.286	110.656	23.91	0.2	8.48569	8.08088	Hainan Island, South China Sea	PTIMS	Porites sp.	Wei et al., 2015
1904	19.286	110.656	23.42	0.32	8.45397	8.01281	Hainan Island, South China Sea	PTIMS	Porites sp.	Wei et al., 2015
1903	19.286	110.656	23.57	0.04	8.46372	8.03373	Hainan Island, South China Sea	PTIMS	Porites sp.	Wei et al., 2015
1902	19.286	110.656	22.74	0.28	8.40924	7.91683	Hainan Island, South China Sea	PTIMS	Porites sp.	Wei et al., 2015
1901	19.286	110.656	22.34	0.02	8.38245	7.85934	Hainan Island, South China Sea	PTIMS	Porites sp.	Wei et al., 2015
1900	19.286	110.656	23.84	0.18	8.48118	8.0712	Hainan Island, South China Sea	PTIMS	Porites sp.	Wei et al., 2015
1899	19.286	110.656	24.09	0.22	8.49726	8.1057	Hainan Island, South China Sea	PTIMS	Porites sp.	Wei et al., 2015
1898	19.286	110.656	23.09	0.2	8.43238	7.96648	Hainan Island, South China Sea	PTIMS	Porites sp.	Wei et al., 2015
1897	19.286	110.656	24.09	0.16	8.49726	8.1057	Hainan Island, South China Sea	PTIMS	Porites sp.	Wei et al., 2015
1896	19.286	110.656	24.35	0.06	8.5139	8.14141	Hainan Island, South China Sea	PTIMS	Porites sp.	Wei et al., 2015
1895	19.286	110.656	25.35	0.24	8.57736	8.2776	Hainan Island, South China Sea	PTIMS	Porites sp.	Wei et al., 2015
1894	19.286	110.656	24.86	0.36	8.54635	8.21104	Hainan Island, South China Sea	PTIMS	Porites sp.	Wei et al., 2015
1893	19.286	110.656	23.82	0.22	8.47989	8.06843	Hainan Island, South China Sea	PTIMS	Porites sp.	Wei et al., 2015
1892	19.286	110.656	22.86	0.34	8.4172	7.93391	Hainan Island, South China Sea	PTIMS	Porites sp.	Wei et al., 2015
1891	19.286	110.656	21.39	0.02	8.31699	7.71887	Hainan Island, South China Sea	PTIMS	Porites sp.	Wei et al., 2015
1890	19.286	110.656	24.27	0.1	8.50878	8.13044	Hainan Island, South China Sea	PTIMS	Porites sp.	Wei et al., 2015
1889	19.286	110.656	24.16	0.22	8.50174	8.11533	Hainan Island, South China Sea	PTIMS	Porites sp.	Wei et al., 2015
1888	19.286	110.656	22.66	0.1	8.40391	7.90539	Hainan Island, South China Sea	PTIMS	Porites sp.	Wei et al., 2015
1887	19.286	110.656	22.19	0.02	8.3723	7.83755	Hainan Island, South China Sea	PTIMS	Porites sp.	Wei et al., 2015
1886	19.286	110.656	22.34	0.02	8.38245	7.85934	Hainan Island, South China Sea	PTIMS	Porites sp.	Wei et al., 2015
1885	19.286	110.656	23.15	0.1	8.43632	7.97493	Hainan Island, South China Sea	PTIMS	Porites sp.	Wei et al., 2015
1884	19.286	110.656	23.55	0.08	8.46242	8.03095	Hainan Island, South China Sea	PTIMS	Porites sp.	Wei et al., 2015
1883	19.286	110.656	24.43	0.1	8.519	8.15236	Hainan Island, South China Sea	PTIMS	Porites sp.	Wei et al., 2015
1882	19.286	110.656	23.74	0.04	8.47472	8.05735	Hainan Island, South China Sea	PTIMS	Porites sp.	Wei et al., 2015
1881	19.286	110.656	24.5	0.2	8.52346	8.16194	Hainan Island, South China Sea	PTIMS	Porites sp.	Wei et al., 2015
1880	19.286	110.656	23.23	0.16	8.44156	7.98618	Hainan Island, South China Sea	PTIMS	Porites sp.	Wei et al., 2015
1879	19.286	110.656	22.55	0.04	8.39657	7.88962	Hainan Island, South China Sea	PTIMS	Porites sp.	Wei et al., 2015
1878	19.286	110.656	24.69	0.36	8.53555	8.18788	Hainan Island, South China Sea	PTIMS	Porites sp.	Wei et al., 2015
1877	19.286	110.656	24.18	0.04	8.50302	8.11808	Hainan Island, South China Sea	PTIMS	Porites sp.	Wei et al., 2015
1876	19.286	110.656	22.51	0.08	8.39389	7.88387	Hainan Island, South China Sea	PTIMS	Porites sp.	Wei et al., 2015
1875	19.286	110.656	22.74	0.14	8.40924	7.91683	Hainan Island, South China Sea	PTIMS	Porites sp.	Wei et al., 2015
1874	19.286	110.656	23.02	0.1	8.42777	7.95659	Hainan Island, South China Sea	PTIMS	Porites sp.	Wei et al., 2015
1873	19.286	110.656	23.52	0.14	8.46047	8.02676	Hainan Island, South China Sea	PTIMS	Porites sp.	Wei et al., 2015
1872	19.286	110.656	23.31	0.24	8.44679	7.99741	Hainan Island, South China Sea	PTIMS	Porites sp.	Wei et al., 2015
1871	19.286	110.656	23.67	0.16	8.4702	8.04764	Hainan Island, South China Sea	PTIMS	Porites sp.	Wei et al., 2015
1870	19.286	110.656	24	0.26	8.49148	8.0933	Hainan Island, South China Sea	PTIMS	Porites sp.	Wei et al., 2015
1869	19.286	110.656	24	0.12	8.49148	8.0933	Hainan Island, South China Sea	PTIMS	Porites sp.	Wei et al., 2015
1868	19.286	110.656	24.41	0.12	8.51773	8.14963	Hainan Island, South China Sea	PTIMS	Porites sp.	Wei et al., 2015
1867	19.286	110.656	24.78	0.2	8.54127	8.20015	Hainan Island, South China Sea	PTIMS	Porites sp.	Wei et al., 2015
1866	19.286	110.656	23.76	0.08	8.47602	8.06012	Hainan Island, South China Sea	PTIMS	Porites sp.	Wei et al., 2015
1865	19.286	110.656	23.45	0.12	8.45592	8.017	Hainan Island, South China Sea	PTIMS	Porites sp.	Wei et al., 2015
1864	19.286	110.656	22.55	0.32	8.39657	7.88962	Hainan Island, South China Sea	PTIMS	Porites sp.	Wei et al., 2015
1863	19.286	110.656	23.44	0.06	8.45527	8.0156	Hainan Island, South China Sea	PTIMS	Porites sp.	Wei et al., 2015
1862	19.286	110.656	22.77	0.2	8.41123	7.9211	Hainan Island, South China Sea	PTIMS	Porites sp.	Wei et al., 2015
1861	19.286	110.656	25.65	0.04	8.59631	8.31825	Hainan Island, South China Sea	PTIMS	Porites sp.	Wei et al., 2015
1860	19.286	110.656	25.02	0.06	8.55649	8.23281	Hainan Island, South China Sea	PTIMS	Porites sp.	Wei et al., 2015
1859	19.286	110.656	23.3	0.24	8.44614	7.99601	Hainan Island, South China Sea	PTIMS	Porites sp.	Wei et al., 2015
1858	19.286	110.656	21.98	0	8.35798	7.80682	Hainan Island, South China Sea	PTIMS	Porites sp.	Wei et al., 2015
1857	19.286	110.656	22.16	0.04	8.37026	7.83318	Hainan Island, South China Sea	PTIMS	Porites sp.	Wei et al., 2015
1856	19.286	110.656	24.46	0.1	8.52091	8.15647	Hainan Island, South China Sea	PTIMS	Porites sp.	Wei et al., 2015
1855	19.286	110.656	23.2	0.1	8.4396	7.98197	Hainan Island, South China Sea	PTIMS	Porites sp.	Wei et al., 2015
1854	19.286	110.656	24.85	0.5	8.54571	8.20968	Hainan Island, South China Sea	PTIMS	Porites sp.	Wei et al., 2015
1853	19.286	110.656	23.51	0.28	8.45982	8.02537	Hainan Island, South China Sea	PTIMS	Porites sp.	Wei et al., 2015
1807	-16.68	146.12	23.61	0.16	8.46631	8.0393	Great Barrier Reef	PTIMS	Porites sp.	Wei et al., 2009
1812	-16.68	146.12	24.53	0.15	8.52537	8.16604	Great Barrier Reef	PTIMS	Porites sp.	Wei et al., 2009
1817	-16.68	146.12	22.74	0.15	8.40924	7.91683	Great Barrier Reef	PTIMS	Porites sp.	Wei et al., 2009
1822	-16.68	146.12	23.86	0.16	8.48247	8.07397	Great Barrier Reef	PTIMS	Porites sp.	Wei et al., 2009
1827	-16.68	146.12	24.77	0.12	8.54064	8.19879	Great Barrier Reef	PTIMS	Porites sp.	Wei et al., 2009
1832	-16.68	146.12	23.6	0.14	8.46566	8.03791	Great Barrier Reef	PTIMS	Porites sp.	Wei et al., 2009
1837	-16.68	146.12	23.12	0.16	8.43435	7.97071	Great Barrier Reef	PTIMS	Porites sp.	Wei et al., 2009
1842	-16.68	146.12	22.88	0.16	8.41853	7.93675	Great Barrier Reef	PTIMS	Porites sp.	Wei et al., 2009
1847	-16.68	146.12	22.94	0.2	8.42249	7.94527	Great Barrier Reef	PTIMS	Porites sp.	Wei et al., 2009
1852	-16.68	146.12	22.9	0.17	8.41985	7.93959	Great Barrier Reef	PTIMS	Porites sp.	Wei et al., 2009
1857	-16.68	146.12	25.38	0.08	8.57926	8.28167	Great Barrier Reef	PTIMS	Porites sp.	Wei et al., 2009
1862	-16.68	146.12	22.63	0.12	8.40191	7.9011	Great Barrier Reef	PTIMS	Porites sp.	Wei et al., 2009
1867	-16.68	146.12	22.53	0.17	8.39523	7.88675	Great Barrier Reef	PTIMS	Porites sp.	Wei et al., 2009
1872	-16.68	146.12	22.53	0.2	8.39523	7.88675	Great Barrier Reef	PTIMS	Porites sp.	Wei et al., 2009
1877	-16.68	146.12	23.14	0.17	8.43566	7.97352	Great Barrier Reef	PTIMS	Porites sp.	Wei et al., 2009
1882	-16.68	146.12	22.96	0.19	8.42381	7.9481	Great Barrier Reef	PTIMS	Porites sp.	Wei et al., 2009
1887	-16.68	146.12	23.5	0.16	8.45917	8.02398	Great Barrier Reef	PTIMS	Porites sp.	Wei et al., 2009
1892	-16.68	146.12	23.17	0.14	8.43763	7.97775	Great Barrier Reef	PTIMS	Porites sp.	Wei et al., 2009
1897	-16.68	146.12	23.43	0.17	8.45462	8.0142	Great Barrier Reef	PTIMS	Porites sp.	Wei et al., 2009
1902	-16.68	146.12	23.37	0.14	8.45071	8.00581	Great Barrier Reef	PTIMS	Porites sp.	Wei et al., 2009
1907	-16.68	146.12	23.95	0.19	8.48826	8.0864	Great Barrier Reef	PTIMS	Porites sp.	Wei et al., 2009
1912	-16.68	146.12	22.52	0.16	8.39456	7.88531	Great Barrier Reef	PTIMS	Porites sp.	Wei et al., 2009
1917	-16.68	146.12	24	0.13	8.49148	8.0933	Great Barrier Reef	PTIMS	Porites sp.	Wei et al., 2009
1922	-16.68	146.12	22.62	0.19	8.40125	7.89967	Great Barrier Reef	PTIMS	Porites sp.	Wei et al., 2009
1927	-16.68	146.12	23.98	0.12	8.49019	8.09054	Great Barrier Reef	PTIMS	Porites sp.	Wei et al., 2009
1932	-16.68	146.12	22.02	0.14	8.36071	7.81269	Great Barrier Reef	PTIMS	Porites sp.	Wei et al., 2009
1937	-16.68	146.12	21.63	0.19	8.33381	7.75495	Great Barrier Reef	PTIMS	Porites sp.	Wei et al., 2009
1940	-16.68	146.12	21.65	0.17	8.3352	7.75793	Great Barrier Reef	PTIMS	Porites sp.	Wei et al., 2009
1941	-16.68	146.12	23.9	0.16	8.48505	8.0795	Great Barrier Reef	PTIMS	Porites sp.	Wei et al., 2009
1942	-16.68	146.12	24.24	0.14	8.50687	8.12632	Great Barrier Reef	PTIMS	Porites sp.	Wei et al., 2009
1943	-16.68	146.12	24.09	0.15	8.49726	8.1057	Great Barrier Reef	PTIMS	Porites sp.	Wei et al., 2009
1944	-16.68	146.12	24.22	0.28	8.50559	8.12357	Great Barrier Reef	PTIMS	Porites sp.	Wei et al., 2009
1945	-16.68	146.12	24.05	0.24	8.49469	8.10019	Great Barrier Reef	PTIMS	Porites sp.	Wei et al., 2009
1946	-16.68	146.12	24.73	0.15	8.5381	8.19334	Great Barrier Reef	PTIMS	Porites sp.	Wei et al., 2009
1947	-16.68	146.12	25.14	0.1	8.56408	8.24911	Great Barrier Reef	PTIMS	Porites sp.	Wei et al., 2009
1948	-16.68	146.12	24.64	0.13	8.53237	8.18106	Great Barrier Reef	PTIMS	Porites sp.	Wei et al., 2009
1949	-16.68	146.12	23.8	0.17	8.4786	8.06566	Great Barrier Reef	PTIMS	Porites sp.	Wei et al., 2009
1950	-16.68	146.12	23.99	0.21	8.49084	8.09192	Great Barrier Reef	PTIMS	Porites sp.	Wei et al., 2009
1951	-16.68	146.12	24.08	0.14	8.49661	8.10432	Great Barrier Reef	PTIMS	Porites sp.	Wei et al., 2009
1952	-16.68	146.12	23.46	0.16	8.45657	8.01839	Great Barrier Reef	PTIMS	Porites sp.	Wei et al., 2009
1953	-16.68	146.12	23.32	0.17	8.44745	7.99881	Great Barrier Reef	PTIMS	Porites sp.	Wei et al., 2009
1954	-16.68	146.12	23.45	0.18	8.45592	8.017	Great Barrier Reef	PTIMS	Porites sp.	Wei et al., 2009
1955	-16.68	146.12	23.14	0.18	8.43566	7.97352	Great Barrier Reef	PTIMS	Porites sp.	Wei et al., 2009
1956	-16.68	146.12	22.96	0.23	8.42381	7.9481	Great Barrier Reef	PTIMS	Porites sp.	Wei et al., 2009
1957	-16.68	146.12	23.25	0.13	8.44287	7.98899	Great Barrier Reef	PTIMS	Porites sp.	Wei et al., 2009
1958	-16.68	146.12	23.67	0.17	8.4702	8.04764	Great Barrier Reef	PTIMS	Porites sp.	Wei et al., 2009
1959	-16.68	146.12	23.06	0.21	8.4304	7.96224	Great Barrier Reef	PTIMS	Porites sp.	Wei et al., 2009
1960	-16.68	146.12	23.55	0.24	8.46242	8.03095	Great Barrier Reef	PTIMS	Porites sp.	Wei et al., 2009
1961	-16.68	146.12	23.04	0.18	8.42909	7.95942	Great Barrier Reef	PTIMS	Porites sp.	Wei et al., 2009
1962	-16.68	146.12	22.76	0.15	8.41057	7.91968	Great Barrier Reef	PTIMS	Porites sp.	Wei et al., 2009
1963	-16.68	146.12	23.09	0.13	8.43238	7.96648	Great Barrier Reef	PTIMS	Porites sp.	Wei et al., 2009
1964	-16.68	146.12	23.3	0.17	8.44614	7.99601	Great Barrier Reef	PTIMS	Porites sp.	Wei et al., 2009
1965	-16.68	146.12	23.74	0.11	8.47472	8.05735	Great Barrier Reef	PTIMS	Porites sp.	Wei et al., 2009
1966	-16.68	146.12	24.08	0.11	8.49661	8.10432	Great Barrier Reef	PTIMS	Porites sp.	Wei et al., 2009
1967	-16.68	146.12	23.61	0.15	8.46631	8.0393	Great Barrier Reef	PTIMS	Porites sp.	Wei et al., 2009
1968	-16.68	146.12	23.96	0.15	8.48891	8.08778	Great Barrier Reef	PTIMS	Porites sp.	Wei et al., 2009
1969	-16.68	146.12	23.9	0.18	8.48505	8.0795	Great Barrier Reef	PTIMS	Porites sp.	Wei et al., 2009
1970	-16.68	146.12	23.52	0.29	8.46047	8.02676	Great Barrier Reef	PTIMS	Porites sp.	Wei et al., 2009
1971	-16.68	146.12	23.57	0.18	8.46372	8.03373	Great Barrier Reef	PTIMS	Porites sp.	Wei et al., 2009
1972	-16.68	146.12	23.9	0.19	8.48505	8.0795	Great Barrier Reef	PTIMS	Porites sp.	Wei et al., 2009
1973	-16.68	146.12	23.19	0.14	8.43894	7.98056	Great Barrier Reef	PTIMS	Porites sp.	Wei et al., 2009
1974	-16.68	146.12	23.83	0.15	8.48053	8.06982	Great Barrier Reef	PTIMS	Porites sp.	Wei et al., 2009
1975	-16.68	146.12	23.77	0.11	8.47666	8.06151	Great Barrier Reef	PTIMS	Porites sp.	Wei et al., 2009
1976	-16.68	146.12	23.34	0.16	8.44875	8.00161	Great Barrier Reef	PTIMS	Porites sp.	Wei et al., 2009
1977	-16.68	146.12	22.96	0.17	8.42381	7.9481	Great Barrier Reef	PTIMS	Porites sp.	Wei et al., 2009
1978	-16.68	146.12	23.37	0.16	8.45071	8.00581	Great Barrier Reef	PTIMS	Porites sp.	Wei et al., 2009
1979	-16.68	146.12	23.45	0.2	8.45592	8.017	Great Barrier Reef	PTIMS	Porites sp.	Wei et al., 2009
1980	-16.68	146.12	22.29	0.22	8.37907	7.85209	Great Barrier Reef	PTIMS	Porites sp.	Wei et al., 2009
1981	-16.68	146.12	23.26	0.16	8.44353	7.9904	Great Barrier Reef	PTIMS	Porites sp.	Wei et al., 2009
1982	-16.68	146.12	23.32	0.16	8.44745	7.99881	Great Barrier Reef	PTIMS	Porites sp.	Wei et al., 2009
1983	-16.68	146.12	23.61	0.16	8.46631	8.0393	Great Barrier Reef	PTIMS	Porites sp.	Wei et al., 2009
1984	-16.68	146.12	23.82	0.2	8.47989	8.06843	Great Barrier Reef	PTIMS	Porites sp.	Wei et al., 2009
1985	-16.68	146.12	23.38	0.25	8.45136	8.00721	Great Barrier Reef	PTIMS	Porites sp.	Wei et al., 2009
1986	-16.68	146.12	22.42	0.23	8.38784	7.8709	Great Barrier Reef	PTIMS	Porites sp.	Wei et al., 2009
1987	-16.68	146.12	22.71	0.28	8.40724	7.91254	Great Barrier Reef	PTIMS	Porites sp.	Wei et al., 2009
1988	-16.68	146.12	22.7	0.18	8.40658	7.91111	Great Barrier Reef	PTIMS	Porites sp.	Wei et al., 2009
1989	-16.68	146.12	22.97	0.14	8.42447	7.94952	Great Barrier Reef	PTIMS	Porites sp.	Wei et al., 2009
1990	-16.68	146.12	22.86	0.2	8.4172	7.93391	Great Barrier Reef	PTIMS	Porites sp.	Wei et al., 2009
1991	-16.68	146.12	22.88	0.18	8.41853	7.93675	Great Barrier Reef	PTIMS	Porites sp.	Wei et al., 2009
1992	-16.68	146.12	23.4	0.11	8.45267	8.01001	Great Barrier Reef	PTIMS	Porites sp.	Wei et al., 2009
1993	-16.68	146.12	24.61	0.13	8.53047	8.17697	Great Barrier Reef	PTIMS	Porites sp.	Wei et al., 2009
1994	-16.68	146.12	24.19	0.17	8.50367	8.11945	Great Barrier Reef	PTIMS	Porites sp.	Wei et al., 2009
1995	-16.68	146.12	24.16	0.13	8.50174	8.11533	Great Barrier Reef	PTIMS	Porites sp.	Wei et al., 2009
1996	-16.68	146.12	22.62	0.16	8.40125	7.89967	Great Barrier Reef	PTIMS	Porites sp.	Wei et al., 2009
1997	-16.68	146.12	21.65	0.18	8.3352	7.75793	Great Barrier Reef	PTIMS	Porites sp.	Wei et al., 2009
1998	-16.68	146.12	21.06	0.21	8.29352	7.6685	Great Barrier Reef	PTIMS	Porites sp.	Wei et al., 2009
1999	-16.68	146.12	21.97	0.2	8.35729	7.80535	Great Barrier Reef	PTIMS	Porites sp.	Wei et al., 2009
2000	-16.68	146.12	22.22	0.14	8.37433	7.84192	Great Barrier Reef	PTIMS	Porites sp.	Wei et al., 2009
2001	-16.68	146.12	21.93	0.16	8.35455	7.79946	Great Barrier Reef	PTIMS	Porites sp.	Wei et al., 2009
2002	-16.68	146.12	23.82	0.16	8.47989	8.06843	Great Barrier Reef	PTIMS	Porites sp.	Wei et al., 2009
2003	-16.68	146.12	23.74	0.16	8.47472	8.05735	Great Barrier Reef	PTIMS	Porites sp.	Wei et al., 2009
2004	-16.68	146.12	21.45	0.28	8.32121	7.72793	Great Barrier Reef	PTIMS	Porites sp.	Wei et al., 2009
2005–2007	28.3	130	23.33	0.24	8.4481	8.00021	Kikaijima island	MC-ICPMS	Porites sp.	Kubota et al., 2017
2000–2002	28.3	130	23.65	0.24	8.4689	8.04486	Kikaijima island	MC-ICPMS	Porites sp.	Kubota et al., 2017
1993–1995	28.3	130	23.91	0.24	8.48569	8.08088	Kikaijima island	MC-ICPMS	Porites sp.	Kubota et al., 2017
1987–1989	28.3	130	23.76	0.24	8.47602	8.06012	Kikaijima island	MC-ICPMS	Porites sp.	Kubota et al., 2017
1980–1982	28.3	130	24.81	0.24	8.54317	8.20424	Kikaijima island	MC-ICPMS	Porites sp.	Kubota et al., 2017
1974–1972	28.3	130	24.77	0.24	8.54064	8.19879	Kikaijima island	MC-ICPMS	Porites sp.	Kubota et al., 2017
1968–1970	28.3	130	24.08	0.24	8.49661	8.10432	Kikaijima island	MC-ICPMS	Porites sp.	Kubota et al., 2017
1963–1965	28.3	130	24.63	0.24	8.53174	8.1797	Kikaijima island	MC-ICPMS	Porites sp.	Kubota et al., 2017
1954–1956	28.3	130	24.15	0.24	8.5011	8.11395	Kikaijima island	MC-ICPMS	Porites sp.	Kubota et al., 2017
1945–1947	28.3	130	24.56	0.24	8.52728	8.17014	Kikaijima island	MC-ICPMS	Porites sp.	Kubota et al., 2017
1937–1939	28.3	130	24.74	0.24	8.53873	8.1947	Kikaijima island	MC-ICPMS	Porites sp.	Kubota et al., 2017
1928–1930	28.3	130	24.36	0.24	8.51453	8.14278	Kikaijima island	MC-ICPMS	Porites sp.	Kubota et al., 2017
1919–1921	28.3	130	24.92	0.24	8.55015	8.21921	Kikaijima island	MC-ICPMS	Porites sp.	Kubota et al., 2017
1910–1912	28.3	130	24.37	0.24	8.51517	8.14415	Kikaijima island	MC-ICPMS	Porites sp.	Kubota et al., 2017
1996–1998	27.1	142.2	23.65	0.24	8.4689	8.04486	Chichijima island	MC-ICPMS	Porites sp.	Kubota et al., 2017
1991–1993	27.1	142.2	23.77	0.24	8.47666	8.06151	Chichijima island	MC-ICPMS	Porites sp.	Kubota et al., 2017
1986–1988	27.1	142.2	24.39	0.24	8.51645	8.14689	Chichijima island	MC-ICPMS	Porites sp.	Kubota et al., 2017
1981–1983	27.1	142.2	24.08	0.24	8.49661	8.10432	Chichijima island	MC-ICPMS	Porites sp.	Kubota et al., 2017
1976–1978	27.1	142.2	23.61	0.24	8.46631	8.0393	Chichijima island	MC-ICPMS	Porites sp.	Kubota et al., 2017
1971–1973	27.1	142.2	24.99	0.24	8.55459	8.22873	Chichijima island	MC-ICPMS	Porites sp.	Kubota et al., 2017
1965–1967	27.1	142.2	24.28	0.24	8.50942	8.13181	Chichijima island	MC-ICPMS	Porites sp.	Kubota et al., 2017
1959–1961	27.1	142.2	24.47	0.24	8.52155	8.15784	Chichijima island	MC-ICPMS	Porites sp.	Kubota et al., 2017
1953–1955	27.1	142.2	24.57	0.24	8.52792	8.17151	Chichijima island	MC-ICPMS	Porites sp.	Kubota et al., 2017
1947–1949	27.1	142.2	24.48	0.24	8.52219	8.1592	Chichijima island	MC-ICPMS	Porites sp.	Kubota et al., 2017
1941–1943	27.1	142.2	24.75	0.24	8.53937	8.19606	Chichijima island	MC-ICPMS	Porites sp.	Kubota et al., 2017
1934–1936	27.1	142.2	24.4	0.24	8.51709	8.14826	Chichijima island	MC-ICPMS	Porites sp.	Kubota et al., 2017
1927–1929	27.1	142.2	25.02	0.24	8.55649	8.23281	Chichijima island	MC-ICPMS	Porites sp.	Kubota et al., 2017
1920–1922	27.1	142.2	23.87	0.24	8.48311	8.07535	Chichijima island	MC-ICPMS	Porites sp.	Kubota et al., 2017
1913–1915	27.1	142.2	24.33	0.24	8.51262	8.13867	Chichijima island	MC-ICPMS	Porites sp.	Kubota et al., 2017
1692	-22.21	166.15	24.021	0.03	8.49283	8.0962	New Caledonia	MC-ICPMS	Diploastrea heliopora	Wu et al., 2018
1693	-22.21	166.15	23.807	0.049	8.47905	8.06663	New Caledonia	MC-ICPMS	Diploastrea heliopora	Wu et al., 2018
1694	-22.21	166.15	24.162	0.245	8.50187	8.1156	New Caledonia	MC-ICPMS	Diploastrea heliopora	Wu et al., 2018
1695	-22.21	166.15	23.905	0.009	8.48537	8.08019	New Caledonia	MC-ICPMS	Diploastrea heliopora	Wu et al., 2018
1696	-22.21	166.15	23.666	0.089	8.46994	8.04708	New Caledonia	MC-ICPMS	Diploastrea heliopora	Wu et al., 2018
1697	-22.21	166.15	24.098	0.095	8.49777	8.1068	New Caledonia	MC-ICPMS	Diploastrea heliopora	Wu et al., 2018
1698	-22.21	166.15	23.944	0.165	8.48788	8.08557	New Caledonia	MC-ICPMS	Diploastrea heliopora	Wu et al., 2018
1699	-22.21	166.15	24.126	0.101	8.49956	8.11065	New Caledonia	MC-ICPMS	Diploastrea heliopora	Wu et al., 2018
1700	-22.21	166.15	23.989	0.177	8.49077	8.09178	New Caledonia	MC-ICPMS	Diploastrea heliopora	Wu et al., 2018
1701	-22.21	166.15	23.844	0.024	8.48144	8.07175	New Caledonia	MC-ICPMS	Diploastrea heliopora	Wu et al., 2018
1702	-22.21	166.15	24.235	0.089	8.50655	8.12563	New Caledonia	MC-ICPMS	Diploastrea heliopora	Wu et al., 2018
1703	-22.21	166.15	23.983	0.175	8.49039	8.09096	New Caledonia	MC-ICPMS	Diploastrea heliopora	Wu et al., 2018
1704	-22.21	166.15	24.453	0.17	8.52047	8.15551	New Caledonia	MC-ICPMS	Diploastrea heliopora	Wu et al., 2018
1705	-22.21	166.15	24.666	0.124	8.53403	8.18461	New Caledonia	MC-ICPMS	Diploastrea heliopora	Wu et al., 2018
1706	-22.21	166.15	24.412	0.032	8.51785	8.1499	New Caledonia	MC-ICPMS	Diploastrea heliopora	Wu et al., 2018
1707	-22.21	166.15	24.981	0.125	8.55402	8.2275	New Caledonia	MC-ICPMS	Diploastrea heliopora	Wu et al., 2018
1708	-22.21	166.15	24.524	0.133	8.52499	8.16522	New Caledonia	MC-ICPMS	Diploastrea heliopora	Wu et al., 2018
1709	-22.21	166.15	24.105	0.044	8.49822	8.10776	New Caledonia	MC-ICPMS	Diploastrea heliopora	Wu et al., 2018
1710	-22.21	166.15	23.754	0.015	8.47563	8.05929	New Caledonia	MC-ICPMS	Diploastrea heliopora	Wu et al., 2018
1711	-22.21	166.15	23.837	0.123	8.48099	8.07079	New Caledonia	MC-ICPMS	Diploastrea heliopora	Wu et al., 2018
1712	-22.21	166.15	23.984	0.096	8.49045	8.09109	New Caledonia	MC-ICPMS	Diploastrea heliopora	Wu et al., 2018
1713	-22.21	166.15	24.27	0.128	8.50878	8.13044	New Caledonia	MC-ICPMS	Diploastrea heliopora	Wu et al., 2018
1714	-22.21	166.15	24.171	0.04	8.50245	8.11684	New Caledonia	MC-ICPMS	Diploastrea heliopora	Wu et al., 2018
1715	-22.21	166.15	24.326	0.106	8.51236	8.13812	New Caledonia	MC-ICPMS	Diploastrea heliopora	Wu et al., 2018
1716	-22.21	166.15	23.843	0.108	8.48137	8.07162	New Caledonia	MC-ICPMS	Diploastrea heliopora	Wu et al., 2018
1717	-22.21	166.15	24.17	0.133	8.50238	8.1167	New Caledonia	MC-ICPMS	Diploastrea heliopora	Wu et al., 2018
1718	-22.21	166.15	23.841	0.155	8.48124	8.07134	New Caledonia	MC-ICPMS	Diploastrea heliopora	Wu et al., 2018
1719	-22.21	166.15	23.962	0.165	8.48904	8.08806	New Caledonia	MC-ICPMS	Diploastrea heliopora	Wu et al., 2018
1720	-22.21	166.15	24.371	0.221	8.51524	8.14428	New Caledonia	MC-ICPMS	Diploastrea heliopora	Wu et al., 2018
1721	-22.21	166.15	24.301	0.258	8.51077	8.13469	New Caledonia	MC-ICPMS	Diploastrea heliopora	Wu et al., 2018
1722	-22.21	166.15	24.35	0.093	8.5139	8.14141	New Caledonia	MC-ICPMS	Diploastrea heliopora	Wu et al., 2018
1723	-22.21	166.15	23.813	0.195	8.47944	8.06746	New Caledonia	MC-ICPMS	Diploastrea heliopora	Wu et al., 2018
1724	-22.21	166.15	24.069	0.059	8.49591	8.10281	New Caledonia	MC-ICPMS	Diploastrea heliopora	Wu et al., 2018
1725	-22.21	166.15	24.305	0.199	8.51102	8.13524	New Caledonia	MC-ICPMS	Diploastrea heliopora	Wu et al., 2018
1726	-22.21	166.15	24.132	0.179	8.49995	8.11148	New Caledonia	MC-ICPMS	Diploastrea heliopora	Wu et al., 2018
1727	-22.21	166.15	25.08	0.115	8.56029	8.24096	New Caledonia	MC-ICPMS	Diploastrea heliopora	Wu et al., 2018
1728	-22.21	166.15	24.633	0.106	8.53193	8.18011	New Caledonia	MC-ICPMS	Diploastrea heliopora	Wu et al., 2018
1729	-22.21	166.15	24.33	0.056	8.51262	8.13867	New Caledonia	MC-ICPMS	Diploastrea heliopora	Wu et al., 2018
1730	-22.21	166.15	23.937	0.064	8.48743	8.08461	New Caledonia	MC-ICPMS	Diploastrea heliopora	Wu et al., 2018
1731	-22.21	166.15	24.17	0.101	8.50238	8.1167	New Caledonia	MC-ICPMS	Diploastrea heliopora	Wu et al., 2018
1732	-22.21	166.15	24.045	0.166	8.49437	8.0995	New Caledonia	MC-ICPMS	Diploastrea heliopora	Wu et al., 2018
1733	-22.21	166.15	24.478	0.054	8.52206	8.15893	New Caledonia	MC-ICPMS	Diploastrea heliopora	Wu et al., 2018
1734	-22.21	166.15	24.501	0.054	8.52353	8.16208	New Caledonia	MC-ICPMS	Diploastrea heliopora	Wu et al., 2018
1735	-22.21	166.15	24.526	0.042	8.52512	8.16549	New Caledonia	MC-ICPMS	Diploastrea heliopora	Wu et al., 2018
1736	-22.21	166.15	24.41	0.208	8.51773	8.14963	New Caledonia	MC-ICPMS	Diploastrea heliopora	Wu et al., 2018
1737	-22.21	166.15	24.718	0.153	8.53733	8.1917	New Caledonia	MC-ICPMS	Diploastrea heliopora	Wu et al., 2018
1738	-22.21	166.15	24.541	0.108	8.52608	8.16754	New Caledonia	MC-ICPMS	Diploastrea heliopora	Wu et al., 2018
1739	-22.21	166.15	24.223	0.102	8.50578	8.12399	New Caledonia	MC-ICPMS	Diploastrea heliopora	Wu et al., 2018
1740	-22.21	166.15	24.803	0.051	8.54273	8.20328	New Caledonia	MC-ICPMS	Diploastrea heliopora	Wu et al., 2018
1741	-22.21	166.15	24.802	0.093	8.54267	8.20315	New Caledonia	MC-ICPMS	Diploastrea heliopora	Wu et al., 2018
1742	-22.21	166.15	24.602	0.099	8.52996	8.17588	New Caledonia	MC-ICPMS	Diploastrea heliopora	Wu et al., 2018
1743	-22.21	166.15	24.592	0.135	8.52932	8.17451	New Caledonia	MC-ICPMS	Diploastrea heliopora	Wu et al., 2018
1744	-22.21	166.15	24.499	0.164	8.5234	8.1618	New Caledonia	MC-ICPMS	Diploastrea heliopora	Wu et al., 2018
1745	-22.21	166.15	24.047	0.21	8.4945	8.09978	New Caledonia	MC-ICPMS	Diploastrea heliopora	Wu et al., 2018
1746	-22.21	166.15	24.308	0.08	8.51121	8.13565	New Caledonia	MC-ICPMS	Diploastrea heliopora	Wu et al., 2018
1747	-22.21	166.15	24.222	0.177	8.50571	8.12385	New Caledonia	MC-ICPMS	Diploastrea heliopora	Wu et al., 2018
1748	-22.21	166.15	24.412	0.054	8.51785	8.1499	New Caledonia	MC-ICPMS	Diploastrea heliopora	Wu et al., 2018
1749	-22.21	166.15	23.847	0.052	8.48163	8.07217	New Caledonia	MC-ICPMS	Diploastrea heliopora	Wu et al., 2018
1750	-22.21	166.15	24.105	0.106	8.49822	8.10776	New Caledonia	MC-ICPMS	Diploastrea heliopora	Wu et al., 2018
1751	-22.21	166.15	23.798	0.021	8.47847	8.06539	New Caledonia	MC-ICPMS	Diploastrea heliopora	Wu et al., 2018
1752	-22.21	166.15	24.215	0.084	8.50527	8.12289	New Caledonia	MC-ICPMS	Diploastrea heliopora	Wu et al., 2018
1753	-22.21	166.15	24.561	0.16	8.52735	8.17028	New Caledonia	MC-ICPMS	Diploastrea heliopora	Wu et al., 2018
1754	-22.21	166.15	24.579	0.074	8.52849	8.17273	New Caledonia	MC-ICPMS	Diploastrea heliopora	Wu et al., 2018
1755	-22.21	166.15	24.52	0.05	8.52474	8.16467	New Caledonia	MC-ICPMS	Diploastrea heliopora	Wu et al., 2018
1756	-22.21	166.15	25.018	0.044	8.55636	8.23253	New Caledonia	MC-ICPMS	Diploastrea heliopora	Wu et al., 2018
1757	-22.21	166.15	24.824	0.043	8.54406	8.20614	New Caledonia	MC-ICPMS	Diploastrea heliopora	Wu et al., 2018
1758	-22.21	166.15	24.726	0.116	8.53784	8.19279	New Caledonia	MC-ICPMS	Diploastrea heliopora	Wu et al., 2018
1759	-22.21	166.15	24.804	0.033	8.54279	8.20342	New Caledonia	MC-ICPMS	Diploastrea heliopora	Wu et al., 2018
1760	-22.21	166.15	24.856	0.066	8.54609	8.2105	New Caledonia	MC-ICPMS	Diploastrea heliopora	Wu et al., 2018
1761	-22.21	166.15	24.554	0.034	8.5269	8.16932	New Caledonia	MC-ICPMS	Diploastrea heliopora	Wu et al., 2018
1762	-22.21	166.15	24.538	0.03	8.52588	8.16713	New Caledonia	MC-ICPMS	Diploastrea heliopora	Wu et al., 2018
1763	-22.21	166.15	25.019	0.096	8.55642	8.23267	New Caledonia	MC-ICPMS	Diploastrea heliopora	Wu et al., 2018
1764	-22.21	166.15	24.887	0.062	8.54806	8.21472	New Caledonia	MC-ICPMS	Diploastrea heliopora	Wu et al., 2018
1765	-22.21	166.15	24.768	0.023	8.54051	8.19852	New Caledonia	MC-ICPMS	Diploastrea heliopora	Wu et al., 2018
1766	-22.21	166.15	24.546	0.086	8.52639	8.16823	New Caledonia	MC-ICPMS	Diploastrea heliopora	Wu et al., 2018
1767	-22.21	166.15	24.426	0.109	8.51875	8.15182	New Caledonia	MC-ICPMS	Diploastrea heliopora	Wu et al., 2018
1768	-22.21	166.15	24.704	0.087	8.53644	8.18979	New Caledonia	MC-ICPMS	Diploastrea heliopora	Wu et al., 2018
1769	-22.21	166.15	24.685	0.065	8.53524	8.1872	New Caledonia	MC-ICPMS	Diploastrea heliopora	Wu et al., 2018
1770	-22.21	166.15	24.926	0.089	8.55053	8.22003	New Caledonia	MC-ICPMS	Diploastrea heliopora	Wu et al., 2018
1771	-22.21	166.15	24.906	0.05	8.54926	8.2173	New Caledonia	MC-ICPMS	Diploastrea heliopora	Wu et al., 2018
1772	-22.21	166.15	24.608	0.072	8.53034	8.17669	New Caledonia	MC-ICPMS	Diploastrea heliopora	Wu et al., 2018
1773	-22.21	166.15	24.568	0.067	8.52779	8.17123	New Caledonia	MC-ICPMS	Diploastrea heliopora	Wu et al., 2018
1774	-22.21	166.15	24.411	0.05	8.51779	8.14976	New Caledonia	MC-ICPMS	Diploastrea heliopora	Wu et al., 2018
1775	-22.21	166.15	24.501	0.019	8.52353	8.16208	New Caledonia	MC-ICPMS	Diploastrea heliopora	Wu et al., 2018
1776	-22.21	166.15	24.197	0.039	8.50411	8.12041	New Caledonia	MC-ICPMS	Diploastrea heliopora	Wu et al., 2018
1777	-22.21	166.15	24.732	0.102	8.53822	8.19361	New Caledonia	MC-ICPMS	Diploastrea heliopora	Wu et al., 2018
1778	-22.21	166.15	24.734	0.126	8.53835	8.19388	New Caledonia	MC-ICPMS	Diploastrea heliopora	Wu et al., 2018
1779	-22.21	166.15	24.669	0.038	8.53422	8.18502	New Caledonia	MC-ICPMS	Diploastrea heliopora	Wu et al., 2018
1780	-22.21	166.15	24.599	0.08	8.52977	8.17547	New Caledonia	MC-ICPMS	Diploastrea heliopora	Wu et al., 2018
1781	-22.21	166.15	24.779	0.123	8.54121	8.20001	New Caledonia	MC-ICPMS	Diploastrea heliopora	Wu et al., 2018
1782	-22.21	166.15	24.806	0.097	8.54292	8.20369	New Caledonia	MC-ICPMS	Diploastrea heliopora	Wu et al., 2018
1783	-22.21	166.15	24.817	0.14	8.54362	8.20519	New Caledonia	MC-ICPMS	Diploastrea heliopora	Wu et al., 2018
1784	-22.21	166.15	24.674	0.163	8.53454	8.1857	New Caledonia	MC-ICPMS	Diploastrea heliopora	Wu et al., 2018
1785	-22.21	166.15	24.706	0.036	8.53657	8.19006	New Caledonia	MC-ICPMS	Diploastrea heliopora	Wu et al., 2018
1786	-22.21	166.15	24.877	0.068	8.54742	8.21336	New Caledonia	MC-ICPMS	Diploastrea heliopora	Wu et al., 2018
1787	-22.21	166.15	24.859	0.164	8.54628	8.21091	New Caledonia	MC-ICPMS	Diploastrea heliopora	Wu et al., 2018
1788	-22.21	166.15	24.362	0.05	8.51466	8.14305	New Caledonia	MC-ICPMS	Diploastrea heliopora	Wu et al., 2018
1789	-22.21	166.15	24.559	0.037	8.52722	8.17	New Caledonia	MC-ICPMS	Diploastrea heliopora	Wu et al., 2018
1790	-22.21	166.15	24.611	0.147	8.53053	8.1771	New Caledonia	MC-ICPMS	Diploastrea heliopora	Wu et al., 2018
1791	-22.21	166.15	25.108	0.048	8.56206	8.24476	New Caledonia	MC-ICPMS	Diploastrea heliopora	Wu et al., 2018
1792	-22.21	166.15	25.242	0.095	8.57053	8.26295	New Caledonia	MC-ICPMS	Diploastrea heliopora	Wu et al., 2018
1793	-22.21	166.15	25.373	0.162	8.57881	8.28072	New Caledonia	MC-ICPMS	Diploastrea heliopora	Wu et al., 2018
1794	-22.21	166.15	25.374	0.116	8.57888	8.28085	New Caledonia	MC-ICPMS	Diploastrea heliopora	Wu et al., 2018
1795	-22.21	166.15	25.395	0.136	8.5802	8.2837	New Caledonia	MC-ICPMS	Diploastrea heliopora	Wu et al., 2018
1796	-22.21	166.15	25.523	0.124	8.58829	8.30105	New Caledonia	MC-ICPMS	Diploastrea heliopora	Wu et al., 2018
1797	-22.21	166.15	25.544	0.085	8.58961	8.30389	New Caledonia	MC-ICPMS	Diploastrea heliopora	Wu et al., 2018
1798	-22.21	166.15	25.223	0.234	8.56933	8.26037	New Caledonia	MC-ICPMS	Diploastrea heliopora	Wu et al., 2018
1799	-22.21	166.15	25.386	0.019	8.57964	8.28248	New Caledonia	MC-ICPMS	Diploastrea heliopora	Wu et al., 2018
1800	-22.21	166.15	25.102	0.144	8.56168	8.24395	New Caledonia	MC-ICPMS	Diploastrea heliopora	Wu et al., 2018
1801	-22.21	166.15	25.238	0.064	8.57028	8.26241	New Caledonia	MC-ICPMS	Diploastrea heliopora	Wu et al., 2018
1802	-22.21	166.15	25.134	0.109	8.5637	8.24829	New Caledonia	MC-ICPMS	Diploastrea heliopora	Wu et al., 2018
1803	-22.21	166.15	24.757	0.251	8.53981	8.19702	New Caledonia	MC-ICPMS	Diploastrea heliopora	Wu et al., 2018
1804	-22.21	166.15	24.38	0.03	8.51581	8.14552	New Caledonia	MC-ICPMS	Diploastrea heliopora	Wu et al., 2018
1805	-22.21	166.15	24.615	0.072	8.53078	8.17765	New Caledonia	MC-ICPMS	Diploastrea heliopora	Wu et al., 2018
1806	-22.21	166.15	24.769	0.202	8.54057	8.19865	New Caledonia	MC-ICPMS	Diploastrea heliopora	Wu et al., 2018
1807	-22.21	166.15	24.44	0.143	8.51964	8.15373	New Caledonia	MC-ICPMS	Diploastrea heliopora	Wu et al., 2018
1808	-22.21	166.15	24.542	0.156	8.52614	8.16768	New Caledonia	MC-ICPMS	Diploastrea heliopora	Wu et al., 2018
1809	-22.21	166.15	24.793	0.042	8.5421	8.20192	New Caledonia	MC-ICPMS	Diploastrea heliopora	Wu et al., 2018
1810	-22.21	166.15	24.498	0.022	8.52334	8.16167	New Caledonia	MC-ICPMS	Diploastrea heliopora	Wu et al., 2018
1811	-22.21	166.15	24.218	0.117	8.50546	8.1233	New Caledonia	MC-ICPMS	Diploastrea heliopora	Wu et al., 2018
1812	-22.21	166.15	24.473	0.215	8.52174	8.15825	New Caledonia	MC-ICPMS	Diploastrea heliopora	Wu et al., 2018
1813	-22.21	166.15	24.587	0.033	8.529	8.17383	New Caledonia	MC-ICPMS	Diploastrea heliopora	Wu et al., 2018
1814	-22.21	166.15	24.275	0.197	8.5091	8.13112	New Caledonia	MC-ICPMS	Diploastrea heliopora	Wu et al., 2018
1815	-22.21	166.15	24.017	0.131	8.49257	8.09564	New Caledonia	MC-ICPMS	Diploastrea heliopora	Wu et al., 2018
1816	-22.21	166.15	24.008	0.135	8.49199	8.0944	New Caledonia	MC-ICPMS	Diploastrea heliopora	Wu et al., 2018
1817	-22.21	166.15	24.349	0.075	8.51383	8.14127	New Caledonia	MC-ICPMS	Diploastrea heliopora	Wu et al., 2018
1818	-22.21	166.15	24.156	0.158	8.50149	8.11478	New Caledonia	MC-ICPMS	Diploastrea heliopora	Wu et al., 2018
1819	-22.21	166.15	24.862	0.093	8.54647	8.21132	New Caledonia	MC-ICPMS	Diploastrea heliopora	Wu et al., 2018
1820	-22.21	166.15	25.029	0.027	8.55706	8.23403	New Caledonia	MC-ICPMS	Diploastrea heliopora	Wu et al., 2018
1821	-22.21	166.15	24.604	0.045	8.53009	8.17615	New Caledonia	MC-ICPMS	Diploastrea heliopora	Wu et al., 2018
1822	-22.21	166.15	24.691	0.212	8.53562	8.18802	New Caledonia	MC-ICPMS	Diploastrea heliopora	Wu et al., 2018
1823	-22.21	166.15	24.822	0.082	8.54394	8.20587	New Caledonia	MC-ICPMS	Diploastrea heliopora	Wu et al., 2018
1824	-22.21	166.15	24.855	0.135	8.54603	8.21036	New Caledonia	MC-ICPMS	Diploastrea heliopora	Wu et al., 2018
1825	-22.21	166.15	25.022	0.138	8.55661	8.23308	New Caledonia	MC-ICPMS	Diploastrea heliopora	Wu et al., 2018
1826	-22.21	166.15	25.2	0.026	8.56788	8.25725	New Caledonia	MC-ICPMS	Diploastrea heliopora	Wu et al., 2018
1827	-22.21	166.15	24.882	0.03	8.54774	8.21404	New Caledonia	MC-ICPMS	Diploastrea heliopora	Wu et al., 2018
1828	-22.21	166.15	24.78	0.012	8.54127	8.20015	New Caledonia	MC-ICPMS	Diploastrea heliopora	Wu et al., 2018
1829	-22.21	166.15	24.855	0.145	8.54603	8.21036	New Caledonia	MC-ICPMS	Diploastrea heliopora	Wu et al., 2018
1830	-22.21	166.15	24.785	0.061	8.54159	8.20083	New Caledonia	MC-ICPMS	Diploastrea heliopora	Wu et al., 2018
1831	-22.21	166.15	24.569	0.066	8.52786	8.17137	New Caledonia	MC-ICPMS	Diploastrea heliopora	Wu et al., 2018
1832	-22.21	166.15	24.671	0.185	8.53435	8.18529	New Caledonia	MC-ICPMS	Diploastrea heliopora	Wu et al., 2018
1833	-22.21	166.15	24.589	0.123	8.52913	8.1741	New Caledonia	MC-ICPMS	Diploastrea heliopora	Wu et al., 2018
1834	-22.21	166.15	24.49	0.187	8.52283	8.16057	New Caledonia	MC-ICPMS	Diploastrea heliopora	Wu et al., 2018
1835	-22.21	166.15	24.557	0.18	8.52709	8.16973	New Caledonia	MC-ICPMS	Diploastrea heliopora	Wu et al., 2018
1836	-22.21	166.15	24.617	0.076	8.53091	8.17792	New Caledonia	MC-ICPMS	Diploastrea heliopora	Wu et al., 2018
1837	-22.21	166.15	23.947	0.08	8.48807	8.08599	New Caledonia	MC-ICPMS	Diploastrea heliopora	Wu et al., 2018
1838	-22.21	166.15	23.889	0.19	8.48434	8.07798	New Caledonia	MC-ICPMS	Diploastrea heliopora	Wu et al., 2018
1839	-22.21	166.15	24.146	0.094	8.50085	8.1134	New Caledonia	MC-ICPMS	Diploastrea heliopora	Wu et al., 2018
1840	-22.21	166.15	24.786	0.146	8.54165	8.20097	New Caledonia	MC-ICPMS	Diploastrea heliopora	Wu et al., 2018
1841	-22.21	166.15	24.62	0.295	8.5311	8.17833	New Caledonia	MC-ICPMS	Diploastrea heliopora	Wu et al., 2018
1842	-22.21	166.15	23.945	0.094	8.48794	8.08571	New Caledonia	MC-ICPMS	Diploastrea heliopora	Wu et al., 2018
1843	-22.21	166.15	24.057	0.118	8.49514	8.10116	New Caledonia	MC-ICPMS	Diploastrea heliopora	Wu et al., 2018
1844	-22.21	166.15	24.545	0.155	8.52633	8.16809	New Caledonia	MC-ICPMS	Diploastrea heliopora	Wu et al., 2018
1845	-22.21	166.15	24.403	0.137	8.51728	8.14867	New Caledonia	MC-ICPMS	Diploastrea heliopora	Wu et al., 2018
1846	-22.21	166.15	24.755	0.14	8.53968	8.19674	New Caledonia	MC-ICPMS	Diploastrea heliopora	Wu et al., 2018
1847	-22.21	166.15	24.745	0.06	8.53905	8.19538	New Caledonia	MC-ICPMS	Diploastrea heliopora	Wu et al., 2018
1848	-22.21	166.15	24.525	0.101	8.52506	8.16536	New Caledonia	MC-ICPMS	Diploastrea heliopora	Wu et al., 2018
1849	-22.21	166.15	24.833	0.12	8.54463	8.20737	New Caledonia	MC-ICPMS	Diploastrea heliopora	Wu et al., 2018
1850	-22.21	166.15	24.655	0.159	8.53333	8.18311	New Caledonia	MC-ICPMS	Diploastrea heliopora	Wu et al., 2018
1851	-22.21	166.15	24.723	0.101	8.53765	8.19238	New Caledonia	MC-ICPMS	Diploastrea heliopora	Wu et al., 2018
1852	-22.21	166.15	24.817	0.116	8.54362	8.20519	New Caledonia	MC-ICPMS	Diploastrea heliopora	Wu et al., 2018
1853	-22.21	166.15	24.878	0.145	8.54749	8.21349	New Caledonia	MC-ICPMS	Diploastrea heliopora	Wu et al., 2018
1854	-22.21	166.15	24.96	0.102	8.55269	8.22465	New Caledonia	MC-ICPMS	Diploastrea heliopora	Wu et al., 2018
1855	-22.21	166.15	24.484	0.198	8.52244	8.15975	New Caledonia	MC-ICPMS	Diploastrea heliopora	Wu et al., 2018
1856	-22.21	166.15	24.46	0.155	8.52091	8.15647	New Caledonia	MC-ICPMS	Diploastrea heliopora	Wu et al., 2018
1857	-22.21	166.15	24.309	0.195	8.51128	8.13579	New Caledonia	MC-ICPMS	Diploastrea heliopora	Wu et al., 2018
1858	-22.21	166.15	24.624	0.104	8.53136	8.17888	New Caledonia	MC-ICPMS	Diploastrea heliopora	Wu et al., 2018
1859	-22.21	166.15	24.513	0.026	8.52429	8.16372	New Caledonia	MC-ICPMS	Diploastrea heliopora	Wu et al., 2018
1860	-22.21	166.15	24.698	0.11	8.53606	8.18897	New Caledonia	MC-ICPMS	Diploastrea heliopora	Wu et al., 2018
1861	-22.21	166.15	24.765	0.113	8.54032	8.19811	New Caledonia	MC-ICPMS	Diploastrea heliopora	Wu et al., 2018
1862	-22.21	166.15	25.142	0.145	8.56421	8.24938	New Caledonia	MC-ICPMS	Diploastrea heliopora	Wu et al., 2018
1863	-22.21	166.15	24.99	0.114	8.55459	8.22873	New Caledonia	MC-ICPMS	Diploastrea heliopora	Wu et al., 2018
1864	-22.21	166.15	24.676	0.078	8.53466	8.18597	New Caledonia	MC-ICPMS	Diploastrea heliopora	Wu et al., 2018
1865	-22.21	166.15	24.913	0.011	8.54971	8.21826	New Caledonia	MC-ICPMS	Diploastrea heliopora	Wu et al., 2018
1866	-22.21	166.15	24.968	0.155	8.55319	8.22574	New Caledonia	MC-ICPMS	Diploastrea heliopora	Wu et al., 2018
1867	-22.21	166.15	25.037	0.064	8.55756	8.23512	New Caledonia	MC-ICPMS	Diploastrea heliopora	Wu et al., 2018
1868	-22.21	166.15	24.797	0.061	8.54235	8.20247	New Caledonia	MC-ICPMS	Diploastrea heliopora	Wu et al., 2018
1869	-22.21	166.15	24.711	0.107	8.53689	8.19075	New Caledonia	MC-ICPMS	Diploastrea heliopora	Wu et al., 2018
1870	-22.21	166.15	24.698	0.039	8.53606	8.18897	New Caledonia	MC-ICPMS	Diploastrea heliopora	Wu et al., 2018
1871	-22.21	166.15	24.681	0.065	8.53498	8.18666	New Caledonia	MC-ICPMS	Diploastrea heliopora	Wu et al., 2018
1872	-22.21	166.15	25.049	0.139	8.55832	8.23675	New Caledonia	MC-ICPMS	Diploastrea heliopora	Wu et al., 2018
1873	-22.21	166.15	24.841	0.034	8.54514	8.20846	New Caledonia	MC-ICPMS	Diploastrea heliopora	Wu et al., 2018
1874	-22.21	166.15	24.532	0.076	8.5255	8.16631	New Caledonia	MC-ICPMS	Diploastrea heliopora	Wu et al., 2018
1875	-22.21	166.15	24.774	0.121	8.54089	8.19933	New Caledonia	MC-ICPMS	Diploastrea heliopora	Wu et al., 2018
1876	-22.21	166.15	24.853	0.052	8.5459	8.21009	New Caledonia	MC-ICPMS	Diploastrea heliopora	Wu et al., 2018
1877	-22.21	166.15	24.823	0.132	8.544	8.20601	New Caledonia	MC-ICPMS	Diploastrea heliopora	Wu et al., 2018
1878	-22.21	166.15	25.012	0.203	8.55598	8.23172	New Caledonia	MC-ICPMS	Diploastrea heliopora	Wu et al., 2018
1879	-22.21	166.15	25.257	0.149	8.57148	8.26499	New Caledonia	MC-ICPMS	Diploastrea heliopora	Wu et al., 2018
1880	-22.21	166.15	25.084	0.098	8.56054	8.2415	New Caledonia	MC-ICPMS	Diploastrea heliopora	Wu et al., 2018
1881	-22.21	166.15	24.604	0.13	8.53009	8.17615	New Caledonia	MC-ICPMS	Diploastrea heliopora	Wu et al., 2018
1882	-22.21	166.15	24.46	0.017	8.52091	8.15647	New Caledonia	MC-ICPMS	Diploastrea heliopora	Wu et al., 2018
1883	-22.21	166.15	24.611	0.021	8.53053	8.1771	New Caledonia	MC-ICPMS	Diploastrea heliopora	Wu et al., 2018
1884	-22.21	166.15	24.959	0.127	8.55262	8.22451	New Caledonia	MC-ICPMS	Diploastrea heliopora	Wu et al., 2018
1885	-22.21	166.15	25.321	0.041	8.57553	8.27367	New Caledonia	MC-ICPMS	Diploastrea heliopora	Wu et al., 2018
1886	-22.21	166.15	25.24	0.054	8.57041	8.26268	New Caledonia	MC-ICPMS	Diploastrea heliopora	Wu et al., 2018
1887	-22.21	166.15	25.028	0.109	8.55699	8.23389	New Caledonia	MC-ICPMS	Diploastrea heliopora	Wu et al., 2018
1888	-22.21	166.15	24.931	0.128	8.55085	8.22071	New Caledonia	MC-ICPMS	Diploastrea heliopora	Wu et al., 2018
1889	-22.21	166.15	25.139	0.115	8.56402	8.24897	New Caledonia	MC-ICPMS	Diploastrea heliopora	Wu et al., 2018
1890	-22.21	166.15	25.43	0.037	8.58241	8.28844	New Caledonia	MC-ICPMS	Diploastrea heliopora	Wu et al., 2018
1891	-22.21	166.15	25.312	0.088	8.57496	8.27245	New Caledonia	MC-ICPMS	Diploastrea heliopora	Wu et al., 2018
1892	-22.21	166.15	25.147	0.02	8.56453	8.25006	New Caledonia	MC-ICPMS	Diploastrea heliopora	Wu et al., 2018
1893	-22.21	166.15	24.9	0.108	8.54888	8.21649	New Caledonia	MC-ICPMS	Diploastrea heliopora	Wu et al., 2018
1894	-22.21	166.15	24.301	0.036	8.51077	8.13469	New Caledonia	MC-ICPMS	Diploastrea heliopora	Wu et al., 2018
1895	-22.21	166.15	23.814	0.057	8.4795	8.0676	New Caledonia	MC-ICPMS	Diploastrea heliopora	Wu et al., 2018
1896	-22.21	166.15	23.693	0.011	8.47169	8.05083	New Caledonia	MC-ICPMS	Diploastrea heliopora	Wu et al., 2018
1897	-22.21	166.15	24.203	0.05	8.5045	8.12124	New Caledonia	MC-ICPMS	Diploastrea heliopora	Wu et al., 2018
1898	-22.21	166.15	24.561	0.124	8.52735	8.17028	New Caledonia	MC-ICPMS	Diploastrea heliopora	Wu et al., 2018
1899	-22.21	166.15	24.009	0.088	8.49206	8.09454	New Caledonia	MC-ICPMS	Diploastrea heliopora	Wu et al., 2018
1900	-22.21	166.15	24.69	0.06	8.53555	8.18788	New Caledonia	MC-ICPMS	Diploastrea heliopora	Wu et al., 2018
1901	-22.21	166.15	23.631	0.07	8.46767	8.04222	New Caledonia	MC-ICPMS	Diploastrea heliopora	Wu et al., 2018
1902	-22.21	166.15	24.146	0.084	8.50085	8.1134	New Caledonia	MC-ICPMS	Diploastrea heliopora	Wu et al., 2018
1903	-22.21	166.15	23.766	0.108	8.4764	8.06095	New Caledonia	MC-ICPMS	Diploastrea heliopora	Wu et al., 2018
1904	-22.21	166.15	23.355	0.064	8.44973	8.00371	New Caledonia	MC-ICPMS	Diploastrea heliopora	Wu et al., 2018
1905	-22.21	166.15	23.593	0.239	8.46521	8.03693	New Caledonia	MC-ICPMS	Diploastrea heliopora	Wu et al., 2018
1906	-22.21	166.15	24.533	0.042	8.52557	8.16645	New Caledonia	MC-ICPMS	Diploastrea heliopora	Wu et al., 2018
1907	-22.21	166.15	24.471	0.145	8.52162	8.15797	New Caledonia	MC-ICPMS	Diploastrea heliopora	Wu et al., 2018
1908	-22.21	166.15	24.365	0.006	8.51485	8.14346	New Caledonia	MC-ICPMS	Diploastrea heliopora	Wu et al., 2018
1909	-22.21	166.15	24.423	0.062	8.51855	8.15141	New Caledonia	MC-ICPMS	Diploastrea heliopora	Wu et al., 2018
1910	-22.21	166.15	24.35	0.158	8.5139	8.14141	New Caledonia	MC-ICPMS	Diploastrea heliopora	Wu et al., 2018
1911	-22.21	166.15	24.056	0.063	8.49507	8.10102	New Caledonia	MC-ICPMS	Diploastrea heliopora	Wu et al., 2018
1912	-22.21	166.15	24.007	0.055	8.49193	8.09427	New Caledonia	MC-ICPMS	Diploastrea heliopora	Wu et al., 2018
1913	-22.21	166.15	23.695	0.018	8.47182	8.05111	New Caledonia	MC-ICPMS	Diploastrea heliopora	Wu et al., 2018
1914	-22.21	166.15	24.153	0.131	8.5013	8.11437	New Caledonia	MC-ICPMS	Diploastrea heliopora	Wu et al., 2018
1915	-22.21	166.15	24.333	0.037	8.51281	8.13908	New Caledonia	MC-ICPMS	Diploastrea heliopora	Wu et al., 2018
1916	-22.21	166.15	24.455	0.067	8.5206	8.15578	New Caledonia	MC-ICPMS	Diploastrea heliopora	Wu et al., 2018
1917	-22.21	166.15	24.351	0.084	8.51396	8.14154	New Caledonia	MC-ICPMS	Diploastrea heliopora	Wu et al., 2018
1918	-22.21	166.15	24.199	0.16	8.50424	8.12069	New Caledonia	MC-ICPMS	Diploastrea heliopora	Wu et al., 2018
1919	-22.21	166.15	24.005	0.058	8.4918	8.09399	New Caledonia	MC-ICPMS	Diploastrea heliopora	Wu et al., 2018
1920	-22.21	166.15	23.675	0.158	8.47052	8.04833	New Caledonia	MC-ICPMS	Diploastrea heliopora	Wu et al., 2018
1921	-22.21	166.15	23.919	0.073	8.48627	8.08212	New Caledonia	MC-ICPMS	Diploastrea heliopora	Wu et al., 2018
1922	-22.21	166.15	24.115	0.063	8.49886	8.10914	New Caledonia	MC-ICPMS	Diploastrea heliopora	Wu et al., 2018
1923	-22.21	166.15	24.007	0.163	8.49193	8.09427	New Caledonia	MC-ICPMS	Diploastrea heliopora	Wu et al., 2018
1924	-22.21	166.15	24.533	0.09	8.52557	8.16645	New Caledonia	MC-ICPMS	Diploastrea heliopora	Wu et al., 2018
1925	-22.21	166.15	23.798	0.097	8.47847	8.06539	New Caledonia	MC-ICPMS	Diploastrea heliopora	Wu et al., 2018
1926	-22.21	166.15	24.523	0.086	8.52493	8.16508	New Caledonia	MC-ICPMS	Diploastrea heliopora	Wu et al., 2018
1927	-22.21	166.15	24.75	0.104	8.53937	8.19606	New Caledonia	MC-ICPMS	Diploastrea heliopora	Wu et al., 2018
1928	-22.21	166.15	24.249	0.066	8.50744	8.12756	New Caledonia	MC-ICPMS	Diploastrea heliopora	Wu et al., 2018
1929	-22.21	166.15	24.329	0.106	8.51255	8.13853	New Caledonia	MC-ICPMS	Diploastrea heliopora	Wu et al., 2018
1930	-22.21	166.15	24.247	0.062	8.50731	8.12728	New Caledonia	MC-ICPMS	Diploastrea heliopora	Wu et al., 2018
1931	-22.21	166.15	23.898	0.126	8.48492	8.07922	New Caledonia	MC-ICPMS	Diploastrea heliopora	Wu et al., 2018
1932	-22.21	166.15	24.455	0.049	8.5206	8.15578	New Caledonia	MC-ICPMS	Diploastrea heliopora	Wu et al., 2018
1933	-22.21	166.15	24.105	0.054	8.49822	8.10776	New Caledonia	MC-ICPMS	Diploastrea heliopora	Wu et al., 2018
1934	-22.21	166.15	24.364	0.074	8.51479	8.14333	New Caledonia	MC-ICPMS	Diploastrea heliopora	Wu et al., 2018
1935	-22.21	166.15	24.338	0.254	8.51313	8.13976	New Caledonia	MC-ICPMS	Diploastrea heliopora	Wu et al., 2018
1936	-22.21	166.15	24.16	0.127	8.50174	8.11533	New Caledonia	MC-ICPMS	Diploastrea heliopora	Wu et al., 2018
1937	-22.21	166.15	24.142	0.055	8.50059	8.11285	New Caledonia	MC-ICPMS	Diploastrea heliopora	Wu et al., 2018
1938	-22.21	166.15	24.131	0.059	8.49989	8.11134	New Caledonia	MC-ICPMS	Diploastrea heliopora	Wu et al., 2018
1939	-22.21	166.15	24.462	0.121	8.52104	8.15674	New Caledonia	MC-ICPMS	Diploastrea heliopora	Wu et al., 2018
1940	-22.21	166.15	24.522	0.205	8.52487	8.16495	New Caledonia	MC-ICPMS	Diploastrea heliopora	Wu et al., 2018
1941	-22.21	166.15	24.538	0.025	8.52588	8.16713	New Caledonia	MC-ICPMS	Diploastrea heliopora	Wu et al., 2018
1942	-22.21	166.15	24.552	0.089	8.52678	8.16905	New Caledonia	MC-ICPMS	Diploastrea heliopora	Wu et al., 2018
1943	-22.21	166.15	24.26	0.072	8.50814	8.12907	New Caledonia	MC-ICPMS	Diploastrea heliopora	Wu et al., 2018
1944	-22.21	166.15	24.578	0.187	8.52843	8.1726	New Caledonia	MC-ICPMS	Diploastrea heliopora	Wu et al., 2018
1945	-22.21	166.15	24.361	0.087	8.5146	8.14291	New Caledonia	MC-ICPMS	Diploastrea heliopora	Wu et al., 2018
1946	-22.21	166.15	24.298	0.107	8.51057	8.13428	New Caledonia	MC-ICPMS	Diploastrea heliopora	Wu et al., 2018
1947	-22.21	166.15	24.134	0.128	8.50008	8.11175	New Caledonia	MC-ICPMS	Diploastrea heliopora	Wu et al., 2018
1948	-22.21	166.15	24.098	0.081	8.49777	8.1068	New Caledonia	MC-ICPMS	Diploastrea heliopora	Wu et al., 2018
1949	-22.21	166.15	24.408	0.198	8.5176	8.14935	New Caledonia	MC-ICPMS	Diploastrea heliopora	Wu et al., 2018
1950	-22.21	166.15	23.95	0.253	8.48826	8.0864	New Caledonia	MC-ICPMS	Diploastrea heliopora	Wu et al., 2018
1951	-22.21	166.15	24.113	0.012	8.49873	8.10887	New Caledonia	MC-ICPMS	Diploastrea heliopora	Wu et al., 2018
1952	-22.21	166.15	24.024	0.086	8.49302	8.09661	New Caledonia	MC-ICPMS	Diploastrea heliopora	Wu et al., 2018
1953	-22.21	166.15	24.407	0.122	8.51753	8.14922	New Caledonia	MC-ICPMS	Diploastrea heliopora	Wu et al., 2018
1954	-22.21	166.15	24.451	0.093	8.52034	8.15524	New Caledonia	MC-ICPMS	Diploastrea heliopora	Wu et al., 2018
1955	-22.21	166.15	24.507	0.093	8.52391	8.1629	New Caledonia	MC-ICPMS	Diploastrea heliopora	Wu et al., 2018
1956	-22.21	166.15	24.195	0.104	8.50399	8.12014	New Caledonia	MC-ICPMS	Diploastrea heliopora	Wu et al., 2018
1957	-22.21	166.15	23.921	0.106	8.4864	8.0824	New Caledonia	MC-ICPMS	Diploastrea heliopora	Wu et al., 2018
1958	-22.21	166.15	23.842	0.021	8.48131	8.07148	New Caledonia	MC-ICPMS	Diploastrea heliopora	Wu et al., 2018
1959	-22.21	166.15	24.427	0.101	8.51881	8.15195	New Caledonia	MC-ICPMS	Diploastrea heliopora	Wu et al., 2018
1960	-22.21	166.15	24.119	0.176	8.49912	8.10969	New Caledonia	MC-ICPMS	Diploastrea heliopora	Wu et al., 2018
1961	-22.21	166.15	23.504	0.023	8.45943	8.02453	New Caledonia	MC-ICPMS	Diploastrea heliopora	Wu et al., 2018
1962	-22.21	166.15	23.531	0.121	8.46119	8.0283	New Caledonia	MC-ICPMS	Diploastrea heliopora	Wu et al., 2018
1963	-22.21	166.15	24.036	0.035	8.49379	8.09826	New Caledonia	MC-ICPMS	Diploastrea heliopora	Wu et al., 2018
1964	-22.21	166.15	24.052	0.168	8.49482	8.10047	New Caledonia	MC-ICPMS	Diploastrea heliopora	Wu et al., 2018
1965	-22.21	166.15	24.308	0.184	8.51121	8.13565	New Caledonia	MC-ICPMS	Diploastrea heliopora	Wu et al., 2018
1966	-22.21	166.15	24.737	0.182	8.53854	8.19429	New Caledonia	MC-ICPMS	Diploastrea heliopora	Wu et al., 2018
1967	-22.21	166.15	24.55	0.053	8.52665	8.16877	New Caledonia	MC-ICPMS	Diploastrea heliopora	Wu et al., 2018
1968	-22.21	166.15	24.28	0.144	8.50942	8.13181	New Caledonia	MC-ICPMS	Diploastrea heliopora	Wu et al., 2018
1969	-22.21	166.15	23.826	0.147	8.48028	8.06926	New Caledonia	MC-ICPMS	Diploastrea heliopora	Wu et al., 2018
1970	-22.21	166.15	24.183	0.08	8.50322	8.11849	New Caledonia	MC-ICPMS	Diploastrea heliopora	Wu et al., 2018
1971	-22.21	166.15	24.156	0.108	8.50149	8.11478	New Caledonia	MC-ICPMS	Diploastrea heliopora	Wu et al., 2018
1972	-22.21	166.15	23.49	0.155	8.45852	8.02258	New Caledonia	MC-ICPMS	Diploastrea heliopora	Wu et al., 2018
1973	-22.21	166.15	23.375	0.126	8.45104	8.00651	New Caledonia	MC-ICPMS	Diploastrea heliopora	Wu et al., 2018
1974	-22.21	166.15	23.61	0.049	8.46631	8.0393	New Caledonia	MC-ICPMS	Diploastrea heliopora	Wu et al., 2018
1975	-22.21	166.15	23.181	0.03	8.43835	7.9793	New Caledonia	MC-ICPMS	Diploastrea heliopora	Wu et al., 2018
1976	-22.21	166.15	23.439	0.172	8.45521	8.01546	New Caledonia	MC-ICPMS	Diploastrea heliopora	Wu et al., 2018
1977	-22.21	166.15	23.656	0.097	8.46929	8.04569	New Caledonia	MC-ICPMS	Diploastrea heliopora	Wu et al., 2018
1978	-22.21	166.15	23.92	0.09	8.48633	8.08226	New Caledonia	MC-ICPMS	Diploastrea heliopora	Wu et al., 2018
1979	-22.21	166.15	24.035	0.231	8.49373	8.09812	New Caledonia	MC-ICPMS	Diploastrea heliopora	Wu et al., 2018
1980	-22.21	166.15	23.756	0.082	8.47576	8.05957	New Caledonia	MC-ICPMS	Diploastrea heliopora	Wu et al., 2018
1981	-22.21	166.15	24.446	0.125	8.52002	8.15455	New Caledonia	MC-ICPMS	Diploastrea heliopora	Wu et al., 2018
1982	-22.21	166.15	24.611	0.16	8.53053	8.1771	New Caledonia	MC-ICPMS	Diploastrea heliopora	Wu et al., 2018
1983	-22.21	166.15	24.288	0.098	8.50993	8.13291	New Caledonia	MC-ICPMS	Diploastrea heliopora	Wu et al., 2018
1984	-22.21	166.15	24.294	0.041	8.51032	8.13373	New Caledonia	MC-ICPMS	Diploastrea heliopora	Wu et al., 2018
1985	-22.21	166.15	24.222	0.239	8.50571	8.12385	New Caledonia	MC-ICPMS	Diploastrea heliopora	Wu et al., 2018
1986	-22.21	166.15	24.198	0.068	8.50418	8.12055	New Caledonia	MC-ICPMS	Diploastrea heliopora	Wu et al., 2018
1987	-22.21	166.15	24.058	0.089	8.4952	8.10129	New Caledonia	MC-ICPMS	Diploastrea heliopora	Wu et al., 2018
1988	-22.21	166.15	24.065	0.083	8.49565	8.10226	New Caledonia	MC-ICPMS	Diploastrea heliopora	Wu et al., 2018
1989	-22.21	166.15	24.194	0.128	8.50392	8.12	New Caledonia	MC-ICPMS	Diploastrea heliopora	Wu et al., 2018
1990	-22.21	166.15	24.319	0.045	8.51192	8.13716	New Caledonia	MC-ICPMS	Diploastrea heliopora	Wu et al., 2018
1991	-22.21	166.15	24.594	0.143	8.52945	8.17478	New Caledonia	MC-ICPMS	Diploastrea heliopora	Wu et al., 2018
1992	-22.21	166.15	24.857	0.062	8.54616	8.21064	New Caledonia	MC-ICPMS	Diploastrea heliopora	Wu et al., 2018
1993	-22.21	166.15	24.502	0.173	8.52359	8.16221	New Caledonia	MC-ICPMS	Diploastrea heliopora	Wu et al., 2018
1994	-22.21	166.15	24.163	0.068	8.50194	8.11574	New Caledonia	MC-ICPMS	Diploastrea heliopora	Wu et al., 2018
1995	-22.21	166.15	24.493	0.073	8.52302	8.16098	New Caledonia	MC-ICPMS	Diploastrea heliopora	Wu et al., 2018
1996	-22.21	166.15	24.005	0.092	8.4918	8.09399	New Caledonia	MC-ICPMS	Diploastrea heliopora	Wu et al., 2018
1997	-22.21	166.15	24.058	0.108	8.4952	8.10129	New Caledonia	MC-ICPMS	Diploastrea heliopora	Wu et al., 2018
1998	-22.21	166.15	24.03	0.065	8.49341	8.09744	New Caledonia	MC-ICPMS	Diploastrea heliopora	Wu et al., 2018
1999	-22.21	166.15	24.118	0.076	8.49905	8.10955	New Caledonia	MC-ICPMS	Diploastrea heliopora	Wu et al., 2018
2000	-22.21	166.15	24.321	0.06	8.51204	8.13743	New Caledonia	MC-ICPMS	Diploastrea heliopora	Wu et al., 2018
2001	-22.21	166.15	23.829	0.131	8.48047	8.06968	New Caledonia	MC-ICPMS	Diploastrea heliopora	Wu et al., 2018
2002	-22.21	166.15	24.406	0.113	8.51747	8.14908	New Caledonia	MC-ICPMS	Diploastrea heliopora	Wu et al., 2018
2003	-22.21	166.15	24.217	0.07	8.50539	8.12316	New Caledonia	MC-ICPMS	Diploastrea heliopora	Wu et al., 2018
2004	-22.21	166.15	23.777	0.088	8.47711	8.06248	New Caledonia	MC-ICPMS	Diploastrea heliopora	Wu et al., 2018
2005	-22.21	166.15	23.95	0.042	8.48826	8.0864	New Caledonia	MC-ICPMS	Diploastrea heliopora	Wu et al., 2018
2006	-22.21	166.15	23.868	0.103	8.48298	8.07507	New Caledonia	MC-ICPMS	Diploastrea heliopora	Wu et al., 2018
2007	-22.21	166.15	23.382	0.127	8.45149	8.00749	New Caledonia	MC-ICPMS	Diploastrea heliopora	Wu et al., 2018
2008	-22.21	166.15	23.566	0.082	8.46346	8.03317	New Caledonia	MC-ICPMS	Diploastrea heliopora	Wu et al., 2018
2009	-22.21	166.15	23.949	0.088	8.4882	8.08626	New Caledonia	MC-ICPMS	Diploastrea heliopora	Wu et al., 2018
2010	-22.21	166.15	23.455	0.114	8.45625	8.0177	New Caledonia	MC-ICPMS	Diploastrea heliopora	Wu et al., 2018
2011	-22.21	166.15	23.369	0.207	8.45064	8.00567	New Caledonia	MC-ICPMS	Diploastrea heliopora	Wu et al., 2018
2008	16.14	-88.26	23.0473	0.2	8.42957	7.96044	Backreef, Mesoamerican Barrier Reef System	MC-ICPMS	Siderastrea siderea	Fowell et al., 2018
2006	16.14	-88.26	22.9664	0.2	8.42424	7.94901	Backreef, Mesoamerican Barrier Reef System	MC-ICPMS	Siderastrea siderea	Fowell et al., 2018
2004	16.14	-88.26	22.7048	0.2	8.4069	7.9118	Backreef, Mesoamerican Barrier Reef System	MC-ICPMS	Siderastrea siderea	Fowell et al., 2018
2002	16.14	-88.26	23.3311	0.2	8.44817	8.00037	Backreef, Mesoamerican Barrier Reef System	MC-ICPMS	Siderastrea siderea	Fowell et al., 2018
2000	16.14	-88.26	23.1119	0.2	8.43382	7.96957	Backreef, Mesoamerican Barrier Reef System	MC-ICPMS	Siderastrea siderea	Fowell et al., 2018
1998	16.14	-88.26	22.9765	0.2	8.4249	7.95044	Backreef, Mesoamerican Barrier Reef System	MC-ICPMS	Siderastrea siderea	Fowell et al., 2018
1996	16.14	-88.26	23.2568	0.2	8.44331	7.98995	Backreef, Mesoamerican Barrier Reef System	MC-ICPMS	Siderastrea siderea	Fowell et al., 2018
1994	16.14	-88.26	22.8728	0.2	8.41805	7.93573	Backreef, Mesoamerican Barrier Reef System	MC-ICPMS	Siderastrea siderea	Fowell et al., 2018
1992	16.14	-88.26	23.0687	0.2	8.43097	7.96347	Backreef, Mesoamerican Barrier Reef System	MC-ICPMS	Siderastrea siderea	Fowell et al., 2018
1988	16.14	-88.26	22.9442	0.2	8.42277	7.94586	Backreef, Mesoamerican Barrier Reef System	MC-ICPMS	Siderastrea siderea	Fowell et al., 2018
1983	16.14	-88.26	23.3973	0.2	8.45249	8.00963	Backreef, Mesoamerican Barrier Reef System	MC-ICPMS	Siderastrea siderea	Fowell et al., 2018
1978	16.14	-88.26	23.5596	0.2	8.46304	8.03228	Backreef, Mesoamerican Barrier Reef System	MC-ICPMS	Siderastrea siderea	Fowell et al., 2018
1976	16.14	-88.26	23.3701	0.2	8.45072	8.00583	Backreef, Mesoamerican Barrier Reef System	MC-ICPMS	Siderastrea siderea	Fowell et al., 2018
1974	16.14	-88.26	23.3098	0.2	8.44678	7.99738	Backreef, Mesoamerican Barrier Reef System	MC-ICPMS	Siderastrea siderea	Fowell et al., 2018
1970	16.14	-88.26	23.283	0.2	8.44503	7.99362	Backreef, Mesoamerican Barrier Reef System	MC-ICPMS	Siderastrea siderea	Fowell et al., 2018
1968	16.14	-88.26	23.2161	0.2	8.44065	7.98423	Backreef, Mesoamerican Barrier Reef System	MC-ICPMS	Siderastrea siderea	Fowell et al., 2018
1966	16.14	-88.26	23.8626	0.2	8.48264	8.07432	Backreef, Mesoamerican Barrier Reef System	MC-ICPMS	Siderastrea siderea	Fowell et al., 2018
1962	16.14	-88.26	23.3745	0.2	8.451	8.00644	Backreef, Mesoamerican Barrier Reef System	MC-ICPMS	Siderastrea siderea	Fowell et al., 2018
1960	16.14	-88.26	23.3095	0.2	8.44676	7.99734	Backreef, Mesoamerican Barrier Reef System	MC-ICPMS	Siderastrea siderea	Fowell et al., 2018
1956	16.14	-88.26	23.4089	0.2	8.45324	8.01126	Backreef, Mesoamerican Barrier Reef System	MC-ICPMS	Siderastrea siderea	Fowell et al., 2018
1952	16.14	-88.26	23.4407	0.2	8.45532	8.01571	Backreef, Mesoamerican Barrier Reef System	MC-ICPMS	Siderastrea siderea	Fowell et al., 2018
1948	16.14	-88.26	23.3179	0.2	8.44731	7.99852	Backreef, Mesoamerican Barrier Reef System	MC-ICPMS	Siderastrea siderea	Fowell et al., 2018
1944	16.14	-88.26	23.2859	0.2	8.44522	7.99404	Backreef, Mesoamerican Barrier Reef System	MC-ICPMS	Siderastrea siderea	Fowell et al., 2018
1944	16.14	-88.26	23.3701	0.2	8.45072	8.00584	Backreef, Mesoamerican Barrier Reef System	MC-ICPMS	Siderastrea siderea	Fowell et al., 2018
1942	16.14	-88.26	23.1764	0.2	8.43805	7.97864	Backreef, Mesoamerican Barrier Reef System	MC-ICPMS	Siderastrea siderea	Fowell et al., 2018
1940	16.14	-88.26	23.2296	0.2	8.44154	7.98613	Backreef, Mesoamerican Barrier Reef System	MC-ICPMS	Siderastrea siderea	Fowell et al., 2018
1936	16.14	-88.26	23.3189	0.2	8.44737	7.99865	Backreef, Mesoamerican Barrier Reef System	MC-ICPMS	Siderastrea siderea	Fowell et al., 2018
1930	16.14	-88.26	24.1256	0.2	8.49954	8.1106	Backreef, Mesoamerican Barrier Reef System	MC-ICPMS	Siderastrea siderea	Fowell et al., 2018
1927	16.14	-88.26	23.6397	0.2	8.46824	8.04343	Backreef, Mesoamerican Barrier Reef System	MC-ICPMS	Siderastrea siderea	Fowell et al., 2018
1925	16.14	-88.26	23.7367	0.2	8.47451	8.0569	Backreef, Mesoamerican Barrier Reef System	MC-ICPMS	Siderastrea siderea	Fowell et al., 2018
1924	16.14	-88.26	24.1427	0.2	8.50063	8.11295	Backreef, Mesoamerican Barrier Reef System	MC-ICPMS	Siderastrea siderea	Fowell et al., 2018
1923	16.14	-88.26	23.8342	0.2	8.4808	8.07039	Backreef, Mesoamerican Barrier Reef System	MC-ICPMS	Siderastrea siderea	Fowell et al., 2018
1922	16.14	-88.26	24.0794	0.2	8.49658	8.10424	Backreef, Mesoamerican Barrier Reef System	MC-ICPMS	Siderastrea siderea	Fowell et al., 2018
1921	16.14	-88.26	24.0607	0.2	8.49537	8.10166	Backreef, Mesoamerican Barrier Reef System	MC-ICPMS	Siderastrea siderea	Fowell et al., 2018
1921	16.14	-88.26	24.0528	0.2	8.49487	8.10057	Backreef, Mesoamerican Barrier Reef System	MC-ICPMS	Siderastrea siderea	Fowell et al., 2018
1920	16.14	-88.26	24.3105	0.2	8.51137	8.136	Backreef, Mesoamerican Barrier Reef System	MC-ICPMS	Siderastrea siderea	Fowell et al., 2018
1919	16.14	-88.26	24.1382	0.2	8.50034	8.11233	Backreef, Mesoamerican Barrier Reef System	MC-ICPMS	Siderastrea siderea	Fowell et al., 2018
1919	16.14	-88.26	24.4234	0.2	8.51858	8.15146	Backreef, Mesoamerican Barrier Reef System	MC-ICPMS	Siderastrea siderea	Fowell et al., 2018
2008	16.137	-88.252	24.7763	0.2	8.54104	8.19965	Forereef, Mesoamerican Barrier Reef System	MC-ICPMS	Siderastrea siderea	Fowell et al., 2018
2004	16.137	-88.252	24.6357	0.2	8.5321	8.18048	Forereef, Mesoamerican Barrier Reef System	MC-ICPMS	Siderastrea siderea	Fowell et al., 2018
2000	16.137	-88.252	23.9009	0.2	8.4851	8.07962	Forereef, Mesoamerican Barrier Reef System	MC-ICPMS	Siderastrea siderea	Fowell et al., 2018
1996	16.137	-88.252	24.1272	0.2	8.49964	8.11082	Forereef, Mesoamerican Barrier Reef System	MC-ICPMS	Siderastrea siderea	Fowell et al., 2018
1992	16.137	-88.252	24.1237	0.2	8.49942	8.11034	Forereef, Mesoamerican Barrier Reef System	MC-ICPMS	Siderastrea siderea	Fowell et al., 2018
1988	16.137	-88.252	24.0723	0.2	8.49612	8.10327	Forereef, Mesoamerican Barrier Reef System	MC-ICPMS	Siderastrea siderea	Fowell et al., 2018
1983	16.137	-88.252	25.1079	0.2	8.56205	8.24474	Forereef, Mesoamerican Barrier Reef System	MC-ICPMS	Siderastrea siderea	Fowell et al., 2018
1978	16.137	-88.252	24.6141	0.2	8.53072	8.17752	Forereef, Mesoamerican Barrier Reef System	MC-ICPMS	Siderastrea siderea	Fowell et al., 2018
1976	16.137	-88.252	25.164	0.2	8.5656	8.25236	Forereef, Mesoamerican Barrier Reef System	MC-ICPMS	Siderastrea siderea	Fowell et al., 2018
1974	16.137	-88.252	23.7638	0.2	8.47626	8.06064	Forereef, Mesoamerican Barrier Reef System	MC-ICPMS	Siderastrea siderea	Fowell et al., 2018
1970	16.137	-88.252	24.329	0.2	8.51255	8.13853	Forereef, Mesoamerican Barrier Reef System	MC-ICPMS	Siderastrea siderea	Fowell et al., 2018
1968	16.137	-88.252	24.8322	0.2	8.54458	8.20726	Forereef, Mesoamerican Barrier Reef System	MC-ICPMS	Siderastrea siderea	Fowell et al., 2018
1966	16.137	-88.252	24.4191	0.2	8.51831	8.15088	Forereef, Mesoamerican Barrier Reef System	MC-ICPMS	Siderastrea siderea	Fowell et al., 2018
1962	16.137	-88.252	24.0178	0.2	8.49262	8.09575	Forereef, Mesoamerican Barrier Reef System	MC-ICPMS	Siderastrea siderea	Fowell et al., 2018
1960	16.137	-88.252	24.3937	0.2	8.51668	8.14739	Forereef, Mesoamerican Barrier Reef System	MC-ICPMS	Siderastrea siderea	Fowell et al., 2018
1956	16.137	-88.252	25.3589	0.2	8.57792	8.27881	Forereef, Mesoamerican Barrier Reef System	MC-ICPMS	Siderastrea siderea	Fowell et al., 2018
1952	16.137	-88.252	24.5829	0.2	8.52874	8.17327	Forereef, Mesoamerican Barrier Reef System	MC-ICPMS	Siderastrea siderea	Fowell et al., 2018
1948	16.137	-88.252	23.9125	0.2	8.48585	8.08122	Forereef, Mesoamerican Barrier Reef System	MC-ICPMS	Siderastrea siderea	Fowell et al., 2018
1944	16.137	-88.252	24.2096	0.2	8.50492	8.12215	Forereef, Mesoamerican Barrier Reef System	MC-ICPMS	Siderastrea siderea	Fowell et al., 2018
1942	16.137	-88.252	24.5296	0.2	8.52535	8.16598	Forereef, Mesoamerican Barrier Reef System	MC-ICPMS	Siderastrea siderea	Fowell et al., 2018
1940	16.137	-88.252	25.056	0.2	8.55876	8.23769	Forereef, Mesoamerican Barrier Reef System	MC-ICPMS	Siderastrea siderea	Fowell et al., 2018
1936	16.137	-88.252	23.9885	0.2	8.49074	8.09172	Forereef, Mesoamerican Barrier Reef System	MC-ICPMS	Siderastrea siderea	Fowell et al., 2018
1934	16.137	-88.252	24.224	0.2	8.50584	8.12412	Forereef, Mesoamerican Barrier Reef System	MC-ICPMS	Siderastrea siderea	Fowell et al., 2018
1930	16.137	-88.252	24.3508	0.2	8.51395	8.14152	Forereef, Mesoamerican Barrier Reef System	MC-ICPMS	Siderastrea siderea	Fowell et al., 2018
1927	16.137	-88.252	24.4512	0.2	8.52035	8.15526	Forereef, Mesoamerican Barrier Reef System	MC-ICPMS	Siderastrea siderea	Fowell et al., 2018
1924	16.137	-88.252	24.3656	0.2	8.51489	8.14354	Forereef, Mesoamerican Barrier Reef System	MC-ICPMS	Siderastrea siderea	Fowell et al., 2018
1922	16.137	-88.252	25.2591	0.2	8.57162	8.26527	Forereef, Mesoamerican Barrier Reef System	MC-ICPMS	Siderastrea siderea	Fowell et al., 2018
1918	16.137	-88.252	24.6435	0.2	8.5326	8.18154	Forereef, Mesoamerican Barrier Reef System	MC-ICPMS	Siderastrea siderea	Fowell et al., 2018
1916	16.137	-88.252	24.6867	0.2	8.53534	8.18743	Forereef, Mesoamerican Barrier Reef System	MC-ICPMS	Siderastrea siderea	Fowell et al., 2018
1912	16.137	-88.252	24.7757	0.2	8.54099	8.19956	Forereef, Mesoamerican Barrier Reef System	MC-ICPMS	Siderastrea siderea	Fowell et al., 2018
1775	32.318	-64.717	23.76	0.27	8.47602	8.06012	Sargasso Sea, Bermuda	MC-ICPMS	Diploria labyrinthiformis	Goodkin et al., 2015
1777	32.318	-64.717	24.36	0.27	8.51453	8.14278	Sargasso Sea, Bermuda	MC-ICPMS	Diploria labyrinthiformis	Goodkin et al., 2015
1779	32.318	-64.717	23.6	0.27	8.46566	8.03791	Sargasso Sea, Bermuda	MC-ICPMS	Diploria labyrinthiformis	Goodkin et al., 2015
1781	32.318	-64.717	24.04	0.27	8.49405	8.09881	Sargasso Sea, Bermuda	MC-ICPMS	Diploria labyrinthiformis	Goodkin et al., 2015
1783	32.318	-64.717	24.16	0.27	8.50174	8.11533	Sargasso Sea, Bermuda	MC-ICPMS	Diploria labyrinthiformis	Goodkin et al., 2015
1785	32.318	-64.717	24.35	0.27	8.5139	8.14141	Sargasso Sea, Bermuda	MC-ICPMS	Diploria labyrinthiformis	Goodkin et al., 2015
1787	32.318	-64.717	24.09	0.27	8.49726	8.1057	Sargasso Sea, Bermuda	MC-ICPMS	Diploria labyrinthiformis	Goodkin et al., 2015
1789	32.318	-64.717	24.24	0.27	8.50687	8.12632	Sargasso Sea, Bermuda	MC-ICPMS	Diploria labyrinthiformis	Goodkin et al., 2015
1791	32.318	-64.717	23.92	0.27	8.48633	8.08226	Sargasso Sea, Bermuda	MC-ICPMS	Diploria labyrinthiformis	Goodkin et al., 2015
1793	32.318	-64.717	24.28	0.27	8.50942	8.13181	Sargasso Sea, Bermuda	MC-ICPMS	Diploria labyrinthiformis	Goodkin et al., 2015
1795	32.318	-64.717	24.12	0.27	8.49918	8.10983	Sargasso Sea, Bermuda	MC-ICPMS	Diploria labyrinthiformis	Goodkin et al., 2015
1797	32.318	-64.717	24.62	0.27	8.5311	8.17833	Sargasso Sea, Bermuda	MC-ICPMS	Diploria labyrinthiformis	Goodkin et al., 2015
1799	32.318	-64.717	24.75	0.27	8.53937	8.19606	Sargasso Sea, Bermuda	MC-ICPMS	Diploria labyrinthiformis	Goodkin et al., 2015
1801	32.318	-64.717	24.75	0.27	8.53937	8.19606	Sargasso Sea, Bermuda	MC-ICPMS	Diploria labyrinthiformis	Goodkin et al., 2015
1803	32.318	-64.717	24.53	0.27	8.52537	8.16604	Sargasso Sea, Bermuda	MC-ICPMS	Diploria labyrinthiformis	Goodkin et al., 2015
1805	32.318	-64.717	24.85	0.27	8.54571	8.20968	Sargasso Sea, Bermuda	MC-ICPMS	Diploria labyrinthiformis	Goodkin et al., 2015
1807	32.318	-64.717	24.58	0.27	8.52856	8.17287	Sargasso Sea, Bermuda	MC-ICPMS	Diploria labyrinthiformis	Goodkin et al., 2015
1809	32.318	-64.717	23.95	0.27	8.48826	8.0864	Sargasso Sea, Bermuda	MC-ICPMS	Diploria labyrinthiformis	Goodkin et al., 2015
1811	32.318	-64.717	24.37	0.27	8.51517	8.14415	Sargasso Sea, Bermuda	MC-ICPMS	Diploria labyrinthiformis	Goodkin et al., 2015
1813	32.318	-64.717	24.65	0.27	8.53301	8.18243	Sargasso Sea, Bermuda	MC-ICPMS	Diploria labyrinthiformis	Goodkin et al., 2015
1815	32.318	-64.717	23.74	0.27	8.47472	8.05735	Sargasso Sea, Bermuda	MC-ICPMS	Diploria labyrinthiformis	Goodkin et al., 2015
1817	32.318	-64.717	24.18	0.27	8.50302	8.11808	Sargasso Sea, Bermuda	MC-ICPMS	Diploria labyrinthiformis	Goodkin et al., 2015
1819	32.318	-64.717	24.36	0.27	8.51453	8.14278	Sargasso Sea, Bermuda	MC-ICPMS	Diploria labyrinthiformis	Goodkin et al., 2015
1821	32.318	-64.717	24.38	0.27	8.51581	8.14552	Sargasso Sea, Bermuda	MC-ICPMS	Diploria labyrinthiformis	Goodkin et al., 2015
1823	32.318	-64.717	23.97	0.27	8.48955	8.08916	Sargasso Sea, Bermuda	MC-ICPMS	Diploria labyrinthiformis	Goodkin et al., 2015
1825	32.318	-64.717	24.58	0.27	8.52856	8.17287	Sargasso Sea, Bermuda	MC-ICPMS	Diploria labyrinthiformis	Goodkin et al., 2015
1827	32.318	-64.717	23.57	0.27	8.46372	8.03373	Sargasso Sea, Bermuda	MC-ICPMS	Diploria labyrinthiformis	Goodkin et al., 2015
1829	32.318	-64.717	24.59	0.27	8.52919	8.17424	Sargasso Sea, Bermuda	MC-ICPMS	Diploria labyrinthiformis	Goodkin et al., 2015
1831	32.318	-64.717	24.62	0.27	8.5311	8.17833	Sargasso Sea, Bermuda	MC-ICPMS	Diploria labyrinthiformis	Goodkin et al., 2015
1833	32.318	-64.717	23.43	0.27	8.45462	8.0142	Sargasso Sea, Bermuda	MC-ICPMS	Diploria labyrinthiformis	Goodkin et al., 2015
1835	32.318	-64.717	25.16	0.27	8.56535	8.25182	Sargasso Sea, Bermuda	MC-ICPMS	Diploria labyrinthiformis	Goodkin et al., 2015
1837	32.318	-64.717	24.83	0.27	8.54444	8.20696	Sargasso Sea, Bermuda	MC-ICPMS	Diploria labyrinthiformis	Goodkin et al., 2015
1839	32.318	-64.717	24.69	0.27	8.53555	8.18788	Sargasso Sea, Bermuda	MC-ICPMS	Diploria labyrinthiformis	Goodkin et al., 2015
1841	32.318	-64.717	24.79	0.27	8.5419	8.20151	Sargasso Sea, Bermuda	MC-ICPMS	Diploria labyrinthiformis	Goodkin et al., 2015
1843	32.318	-64.717	24.96	0.27	8.55269	8.22465	Sargasso Sea, Bermuda	MC-ICPMS	Diploria labyrinthiformis	Goodkin et al., 2015
1845	32.318	-64.717	25.07	0.27	8.55965	8.2396	Sargasso Sea, Bermuda	MC-ICPMS	Diploria labyrinthiformis	Goodkin et al., 2015
1847	32.318	-64.717	24.36	0.27	8.51453	8.14278	Sargasso Sea, Bermuda	MC-ICPMS	Diploria labyrinthiformis	Goodkin et al., 2015
1849	32.318	-64.717	25.11	0.27	8.56219	8.24503	Sargasso Sea, Bermuda	MC-ICPMS	Diploria labyrinthiformis	Goodkin et al., 2015
1851	32.318	-64.717	25.04	0.27	8.55775	8.23552	Sargasso Sea, Bermuda	MC-ICPMS	Diploria labyrinthiformis	Goodkin et al., 2015
1853	32.318	-64.717	24.64	0.27	8.53237	8.18106	Sargasso Sea, Bermuda	MC-ICPMS	Diploria labyrinthiformis	Goodkin et al., 2015
1855	32.318	-64.717	24.67	0.27	8.53428	8.18516	Sargasso Sea, Bermuda	MC-ICPMS	Diploria labyrinthiformis	Goodkin et al., 2015
1857	32.318	-64.717	24.53	0.27	8.52537	8.16604	Sargasso Sea, Bermuda	MC-ICPMS	Diploria labyrinthiformis	Goodkin et al., 2015
1859	32.318	-64.717	24.36	0.27	8.51453	8.14278	Sargasso Sea, Bermuda	MC-ICPMS	Diploria labyrinthiformis	Goodkin et al., 2015
1861	32.318	-64.717	25.01	0.27	8.55585	8.23145	Sargasso Sea, Bermuda	MC-ICPMS	Diploria labyrinthiformis	Goodkin et al., 2015
1863	32.318	-64.717	24.81	0.27	8.54317	8.20424	Sargasso Sea, Bermuda	MC-ICPMS	Diploria labyrinthiformis	Goodkin et al., 2015
1865	32.318	-64.717	24.45	0.27	8.52028	8.1551	Sargasso Sea, Bermuda	MC-ICPMS	Diploria labyrinthiformis	Goodkin et al., 2015
1867	32.318	-64.717	24.32	0.27	8.51198	8.1373	Sargasso Sea, Bermuda	MC-ICPMS	Diploria labyrinthiformis	Goodkin et al., 2015
1869	32.318	-64.717	24.13	0.27	8.49982	8.1112	Sargasso Sea, Bermuda	MC-ICPMS	Diploria labyrinthiformis	Goodkin et al., 2015
1871	32.318	-64.717	24.31	0.27	8.51134	8.13592	Sargasso Sea, Bermuda	MC-ICPMS	Diploria labyrinthiformis	Goodkin et al., 2015
1873	32.318	-64.717	24.02	0.27	8.49276	8.09606	Sargasso Sea, Bermuda	MC-ICPMS	Diploria labyrinthiformis	Goodkin et al., 2015
1875	32.318	-64.717	24.12	0.27	8.49918	8.10983	Sargasso Sea, Bermuda	MC-ICPMS	Diploria labyrinthiformis	Goodkin et al., 2015
1877	32.318	-64.717	24.46	0.27	8.52091	8.15647	Sargasso Sea, Bermuda	MC-ICPMS	Diploria labyrinthiformis	Goodkin et al., 2015
1879	32.318	-64.717	24.75	0.27	8.53937	8.19606	Sargasso Sea, Bermuda	MC-ICPMS	Diploria labyrinthiformis	Goodkin et al., 2015
1881	32.318	-64.717	24.36	0.27	8.51453	8.14278	Sargasso Sea, Bermuda	MC-ICPMS	Diploria labyrinthiformis	Goodkin et al., 2015
1883	32.318	-64.717	23.91	0.27	8.48569	8.08088	Sargasso Sea, Bermuda	MC-ICPMS	Diploria labyrinthiformis	Goodkin et al., 2015
1885	32.318	-64.717	23.78	0.27	8.47731	8.06289	Sargasso Sea, Bermuda	MC-ICPMS	Diploria labyrinthiformis	Goodkin et al., 2015
1887	32.318	-64.717	23.63	0.27	8.46761	8.04208	Sargasso Sea, Bermuda	MC-ICPMS	Diploria labyrinthiformis	Goodkin et al., 2015
1889	32.318	-64.717	23.85	0.27	8.48182	8.07258	Sargasso Sea, Bermuda	MC-ICPMS	Diploria labyrinthiformis	Goodkin et al., 2015
1891	32.318	-64.717	23.82	0.27	8.47989	8.06843	Sargasso Sea, Bermuda	MC-ICPMS	Diploria labyrinthiformis	Goodkin et al., 2015
1893	32.318	-64.717	24.41	0.27	8.51773	8.14963	Sargasso Sea, Bermuda	MC-ICPMS	Diploria labyrinthiformis	Goodkin et al., 2015
1895	32.318	-64.717	24.66	0.27	8.53365	8.18379	Sargasso Sea, Bermuda	MC-ICPMS	Diploria labyrinthiformis	Goodkin et al., 2015
1897	32.318	-64.717	24.81	0.27	8.54317	8.20424	Sargasso Sea, Bermuda	MC-ICPMS	Diploria labyrinthiformis	Goodkin et al., 2015
1899	32.318	-64.717	25.16	0.27	8.56535	8.25182	Sargasso Sea, Bermuda	MC-ICPMS	Diploria labyrinthiformis	Goodkin et al., 2015
1901	32.318	-64.717	24.44	0.27	8.51964	8.15373	Sargasso Sea, Bermuda	MC-ICPMS	Diploria labyrinthiformis	Goodkin et al., 2015
1903	32.318	-64.717	24.04	0.27	8.49405	8.09881	Sargasso Sea, Bermuda	MC-ICPMS	Diploria labyrinthiformis	Goodkin et al., 2015
1905	32.318	-64.717	24.22	0.27	8.50559	8.12357	Sargasso Sea, Bermuda	MC-ICPMS	Diploria labyrinthiformis	Goodkin et al., 2015
1907	32.318	-64.717	23.99	0.27	8.49084	8.09192	Sargasso Sea, Bermuda	MC-ICPMS	Diploria labyrinthiformis	Goodkin et al., 2015
1909	32.318	-64.717	24.02	0.27	8.49276	8.09606	Sargasso Sea, Bermuda	MC-ICPMS	Diploria labyrinthiformis	Goodkin et al., 2015
1911	32.318	-64.717	24.46	0.27	8.52091	8.15647	Sargasso Sea, Bermuda	MC-ICPMS	Diploria labyrinthiformis	Goodkin et al., 2015
1913	32.318	-64.717	24.92	0.27	8.55015	8.21921	Sargasso Sea, Bermuda	MC-ICPMS	Diploria labyrinthiformis	Goodkin et al., 2015
1915	32.318	-64.717	24.44	0.27	8.51964	8.15373	Sargasso Sea, Bermuda	MC-ICPMS	Diploria labyrinthiformis	Goodkin et al., 2015
1917	32.318	-64.717	23.8	0.27	8.4786	8.06566	Sargasso Sea, Bermuda	MC-ICPMS	Diploria labyrinthiformis	Goodkin et al., 2015
1919	32.318	-64.717	24.38	0.27	8.51581	8.14552	Sargasso Sea, Bermuda	MC-ICPMS	Diploria labyrinthiformis	Goodkin et al., 2015
1921	32.318	-64.717	23.48	0.27	8.45787	8.02119	Sargasso Sea, Bermuda	MC-ICPMS	Diploria labyrinthiformis	Goodkin et al., 2015
1923	32.318	-64.717	23.31	0.27	8.44679	7.99741	Sargasso Sea, Bermuda	MC-ICPMS	Diploria labyrinthiformis	Goodkin et al., 2015
1926	32.318	-64.717	23.84	0.27	8.48118	8.0712	Sargasso Sea, Bermuda	MC-ICPMS	Diploria labyrinthiformis	Goodkin et al., 2015
1928	32.318	-64.717	24.18	0.27	8.50302	8.11808	Sargasso Sea, Bermuda	MC-ICPMS	Diploria labyrinthiformis	Goodkin et al., 2015
1930	32.318	-64.717	24.52	0.27	8.52474	8.16467	Sargasso Sea, Bermuda	MC-ICPMS	Diploria labyrinthiformis	Goodkin et al., 2015
1932	32.318	-64.717	24.43	0.27	8.519	8.15236	Sargasso Sea, Bermuda	MC-ICPMS	Diploria labyrinthiformis	Goodkin et al., 2015
1934	32.318	-64.717	23.87	0.27	8.48311	8.07535	Sargasso Sea, Bermuda	MC-ICPMS	Diploria labyrinthiformis	Goodkin et al., 2015
1936	32.318	-64.717	23.43	0.27	8.45462	8.0142	Sargasso Sea, Bermuda	MC-ICPMS	Diploria labyrinthiformis	Goodkin et al., 2015
1938	32.318	-64.717	23.82	0.27	8.47989	8.06843	Sargasso Sea, Bermuda	MC-ICPMS	Diploria labyrinthiformis	Goodkin et al., 2015
1940	32.318	-64.717	24.35	0.27	8.5139	8.14141	Sargasso Sea, Bermuda	MC-ICPMS	Diploria labyrinthiformis	Goodkin et al., 2015
1942	32.318	-64.717	24.1	0.27	8.4979	8.10708	Sargasso Sea, Bermuda	MC-ICPMS	Diploria labyrinthiformis	Goodkin et al., 2015
1944	32.318	-64.717	24.28	0.27	8.50942	8.13181	Sargasso Sea, Bermuda	MC-ICPMS	Diploria labyrinthiformis	Goodkin et al., 2015
1946	32.318	-64.717	23.6	0.27	8.46566	8.03791	Sargasso Sea, Bermuda	MC-ICPMS	Diploria labyrinthiformis	Goodkin et al., 2015
1948	32.318	-64.717	23.13	0.27	8.43501	7.97212	Sargasso Sea, Bermuda	MC-ICPMS	Diploria labyrinthiformis	Goodkin et al., 2015
1950	32.318	-64.717	23.02	0.27	8.42777	7.95659	Sargasso Sea, Bermuda	MC-ICPMS	Diploria labyrinthiformis	Goodkin et al., 2015
1952	32.318	-64.717	23.84	0.27	8.48118	8.0712	Sargasso Sea, Bermuda	MC-ICPMS	Diploria labyrinthiformis	Goodkin et al., 2015
1954	32.318	-64.717	23.99	0.27	8.49084	8.09192	Sargasso Sea, Bermuda	MC-ICPMS	Diploria labyrinthiformis	Goodkin et al., 2015
1956	32.318	-64.717	23.64	0.27	8.46826	8.04347	Sargasso Sea, Bermuda	MC-ICPMS	Diploria labyrinthiformis	Goodkin et al., 2015
1958	32.318	-64.717	23.84	0.27	8.48118	8.0712	Sargasso Sea, Bermuda	MC-ICPMS	Diploria labyrinthiformis	Goodkin et al., 2015
1960	32.318	-64.717	23.46	0.27	8.45657	8.01839	Sargasso Sea, Bermuda	MC-ICPMS	Diploria labyrinthiformis	Goodkin et al., 2015
1962	32.318	-64.717	23.05	0.27	8.42975	7.96083	Sargasso Sea, Bermuda	MC-ICPMS	Diploria labyrinthiformis	Goodkin et al., 2015
1964	32.318	-64.717	23.52	0.27	8.46047	8.02676	Sargasso Sea, Bermuda	MC-ICPMS	Diploria labyrinthiformis	Goodkin et al., 2015
1966	32.318	-64.717	24.21	0.27	8.50495	8.1222	Sargasso Sea, Bermuda	MC-ICPMS	Diploria labyrinthiformis	Goodkin et al., 2015
1968	32.318	-64.717	24	0.27	8.49148	8.0933	Sargasso Sea, Bermuda	MC-ICPMS	Diploria labyrinthiformis	Goodkin et al., 2015
1970	32.318	-64.717	24.05	0.27	8.49469	8.10019	Sargasso Sea, Bermuda	MC-ICPMS	Diploria labyrinthiformis	Goodkin et al., 2015
1972	32.318	-64.717	24.44	0.27	8.51964	8.15373	Sargasso Sea, Bermuda	MC-ICPMS	Diploria labyrinthiformis	Goodkin et al., 2015
1974	32.318	-64.717	23.72	0.27	8.47343	8.05458	Sargasso Sea, Bermuda	MC-ICPMS	Diploria labyrinthiformis	Goodkin et al., 2015
1976	32.318	-64.717	23.48	0.27	8.45787	8.02119	Sargasso Sea, Bermuda	MC-ICPMS	Diploria labyrinthiformis	Goodkin et al., 2015
1978	32.318	-64.717	24.2	0.27	8.50431	8.12083	Sargasso Sea, Bermuda	MC-ICPMS	Diploria labyrinthiformis	Goodkin et al., 2015
1980	32.318	-64.717	23.75	0.27	8.47537	8.05874	Sargasso Sea, Bermuda	MC-ICPMS	Diploria labyrinthiformis	Goodkin et al., 2015
1982	32.318	-64.717	24.36	0.27	8.51453	8.14278	Sargasso Sea, Bermuda	MC-ICPMS	Diploria labyrinthiformis	Goodkin et al., 2015
1984	32.318	-64.717	23.91	0.27	8.48569	8.08088	Sargasso Sea, Bermuda	MC-ICPMS	Diploria labyrinthiformis	Goodkin et al., 2015
1986	32.318	-64.717	24.11	0.27	8.49854	8.10845	Sargasso Sea, Bermuda	MC-ICPMS	Diploria labyrinthiformis	Goodkin et al., 2015
1988	32.318	-64.717	23.9	0.27	8.48505	8.0795	Sargasso Sea, Bermuda	MC-ICPMS	Diploria labyrinthiformis	Goodkin et al., 2015
1990	32.318	-64.717	23.84	0.27	8.48118	8.0712	Sargasso Sea, Bermuda	MC-ICPMS	Diploria labyrinthiformis	Goodkin et al., 2015
1992	32.318	-64.717	23.53	0.27	8.46112	8.02816	Sargasso Sea, Bermuda	MC-ICPMS	Diploria labyrinthiformis	Goodkin et al., 2015
1996	32.318	-64.717	23.79	0.27	8.47795	8.06428	Sargasso Sea, Bermuda	MC-ICPMS	Brain coral	Goodkin et al., 2015
