# Supplementary material for: Assessment of paleo-ocean pH records from boron isotope ratio in the Pacific and Atlantic ocean corals: Role of anthropogenic CO&lt;sub&gt;2&lt;/sub&gt; forcing and oceanographic factors to pH variability
Source: Copernicus journal article supplement (doi:10.5194/bg-2018-438), 2018-10-15
Supplement: Supplementary file 1 [file Supplementary Material.pdf › Supplementary Material.pdf]

1 **Supplementary material**

2

3

4 **Assessment of paleo-ocean pH records from boron isotope ratio in the Pacific and**

5 **Atlantic ocean corals: Role of anthropogenic CO<sub>2</sub> forcing and oceanographic factors**

6 **to pH variability**

7

8 **\*Mohd Tarique and Waliur Rahaman**

9 National Centre for Polar & Ocean Research, Goa

10

11 *\*Corresponding: [tarique@ncaor.gov.in](mailto:tarique@ncaor.gov.in)*

12 *Submitted to: Biogeosciences*

13

14

15

16 **Contents of this file**

17 Excel file containing published records of boron isotope records of corals (separately

18 attached)

19 Section S1, S2 and S3

20 Figure S1

21 Figure S2

22 Figure S3

23 Table S1

24 References S1

25

26

27

28

## 30 **S1. Reconstruction of Theoretical pH records using CO2SYS**

31 Carbonate system comprises of six variables i.e. pH, CO<sub>2</sub>, [CO<sub>3</sub><sup>2-</sup>], [HCO<sub>3</sub><sup>-</sup>], total  
 32 alkalinity (TA) and dissolved inorganic carbon (DIC) (Dickson et al., 2007; Millero, 2006;  
 33 Zeebe and Wolf-Gladrow, 2001). Given any two known variables (e.g. TA and pCO<sub>2</sub>) along  
 34 with physical parameters i.e. sea surface temperature (SST), and salinity (SSS), we can  
 35 theoretically calculate any of the other variables. Theoretical pH was calculated using  
 36 carbonate system variables into Matlab based CO2SYS program (Van Heuven et al., 2011).  
 37 Therefore, theoretical pH represents pH variation only due to changes in SST, SSS, TA and  
 38 pCO<sub>2</sub>. Past SST, SSS and TA were reconstructed based on the proxy records of Sr/Ca,  
 39 Mg/Ca and δ<sup>18</sup>O using the empirical relations (equations) provided in Table S1. The past  
 40 atmospheric CO<sub>2</sub> data was taken from Law Dome Ice core (Etheridge et al., 1996) and  
 41 instrumental records from the Mauna Loa observatory in Pacific  
 42 ([www.esrl.noaa.gov/gmd/ccgg/trends/](http://www.esrl.noaa.gov/gmd/ccgg/trends/)). For theoretical pH calculation, dissociation  
 43 constants of carbonic acid, K<sub>1</sub> and K<sub>2</sub> are taken from Mehrbach et al. (1973) and Dickson  
 44 and Millero (1987), boric acid, K<sub>B</sub> (Dickson, 1990) and water, K<sub>W</sub> (DOE, 1994) and total  
 45 boron concentration, B<sub>T</sub> (Lee et al., 2010).

## 46 **S2: Uncertainty associated with theoretical pH reconstruction**

47 Theoretical pH was reconstructed using the reconstructed parameters (i.e. SST, SSS  
 48 and TA) in Matlab based CO2SYS program. These reconstructed parameters are associated  
 49 with uncertainties that derived from analytical uncertainties of the proxies and calibration  
 50 methods. Hence, while calculating the theoretical pH, these errors will be propagated to the  
 51 uncertainty associated with theoretical pH. Further, the dissociations constants used in  
 52 theoretical pH estimation are depended on temperature and salinity and therefore the  
 53 uncertainty associated with the carbonate system variables which finally propagate to  
 54 theoretical pH estimation. A constant error of 0.5°C in SST and 0.2 psu in salinity were used  
 55 in the calculations which includes analytical uncertainty and calibration equation (Gagan et

al., 2012; Goodkin et al., 2005; Iijima et al., 2005; Morimoto et al., 2002; Yu et al., 2005). TA was calculated using SST and SSS records (Lee et al., 2006) with an uncertainty of 8.6  $\mu\text{mol/Kg}$ . Another carbonate system parameter used for theoretical pH calculation is  $\text{pCO}_2$ . Although we have used  $\text{pCO}_2$  record from ice core but the  $\text{pCO}_2$  in coral reef environment is not in equilibrium with atmosphere due to reef calcification, photosynthesis or flushing of reef environment. Therefore, we accounted this offset in the  $\text{pCO}_2$  of atmosphere and reef environment in the theoretical calculations. Spatial annual mean  $\Delta\text{pCO}_2$  ( $\text{pCO}_{2\text{ seawater}} - \text{pCO}_{2\text{ atmosphere}}$ ) is well documented by Takahashi et al. (2014) (Fig. S2). Fig. S2 shows that all the sites in this study have  $\Delta\text{pCO}_2$  less than  $\pm 10 \mu\text{atm}$ . Hence, a constant error of 10  $\mu\text{atm}$  was used in error propagation into theoretical pH calculation. Finally, uncertainty in the theoretical pH was estimated using Monte Carlo error propagation method with 10,000-iteration (Wagener et al., 2001), which is represented as error envelop (Fig. 3).

### S3: Error Sensitivity analysis:

In order to understand the error in which of the reconstructed parameters (SST, SSS, TA and  $\text{pCO}_2$ ) is most sensitive to the error in theoretical pH, error sensitivity analysis was performed. Results of the error sensitivity are shown in Fig. S2.

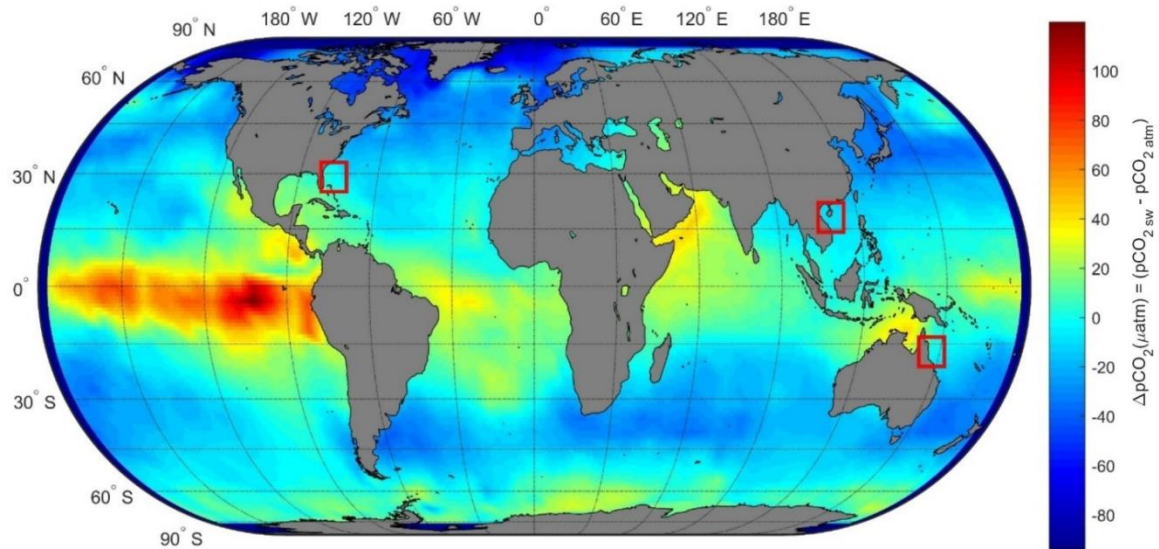

Figure S1: Surface plot of annual mean  $\Delta p\text{CO}_2$  ( $\mu\text{atm}$ ) = ( $p\text{CO}_2$  seawater –  $p\text{CO}_2$  atmosphere) record from Takahashi et al. (2014). Squares represents the locations from where theoretical pH was reconstructed.

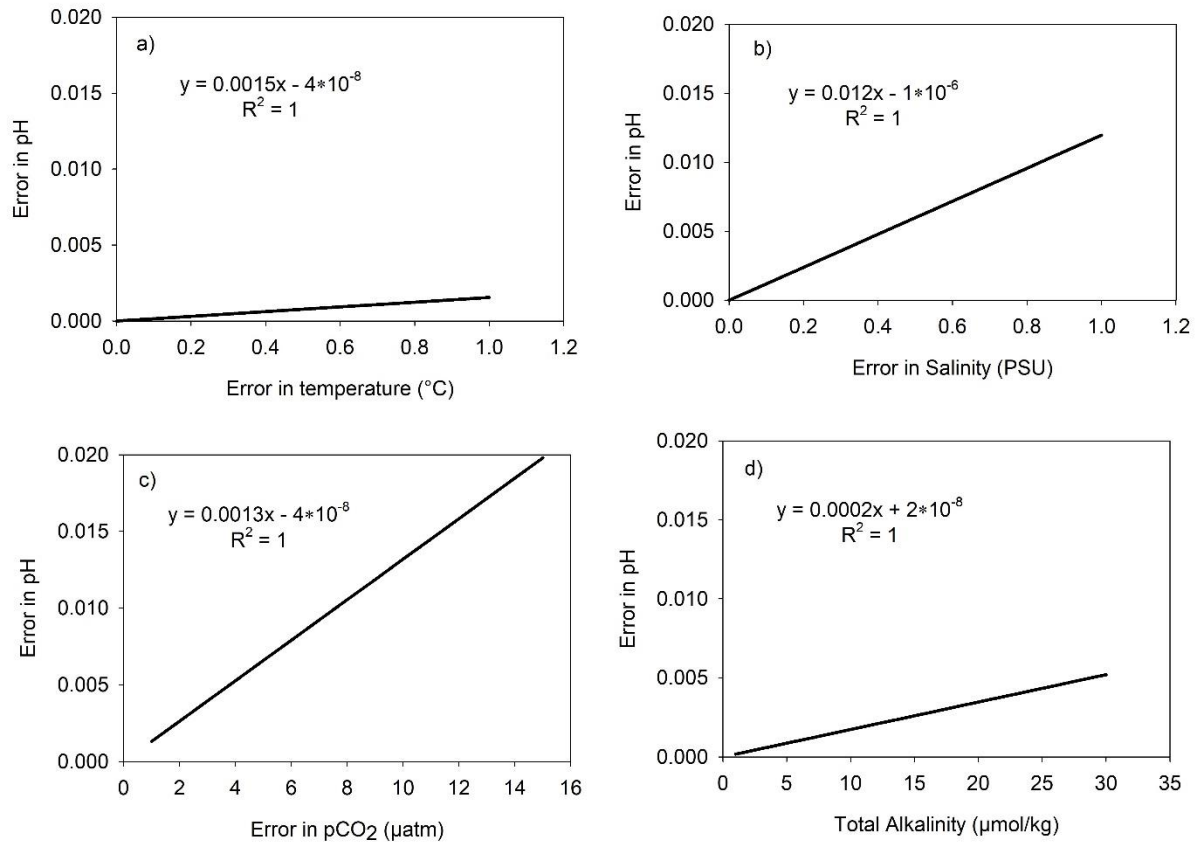

Figure S2: Error sensitivity analysis for (a) temperature (b) salinity (c)  $p\text{CO}_2$  and (d) Total alkalinity. Slopes in these regression equations reflect sensitivity to the error in pH.

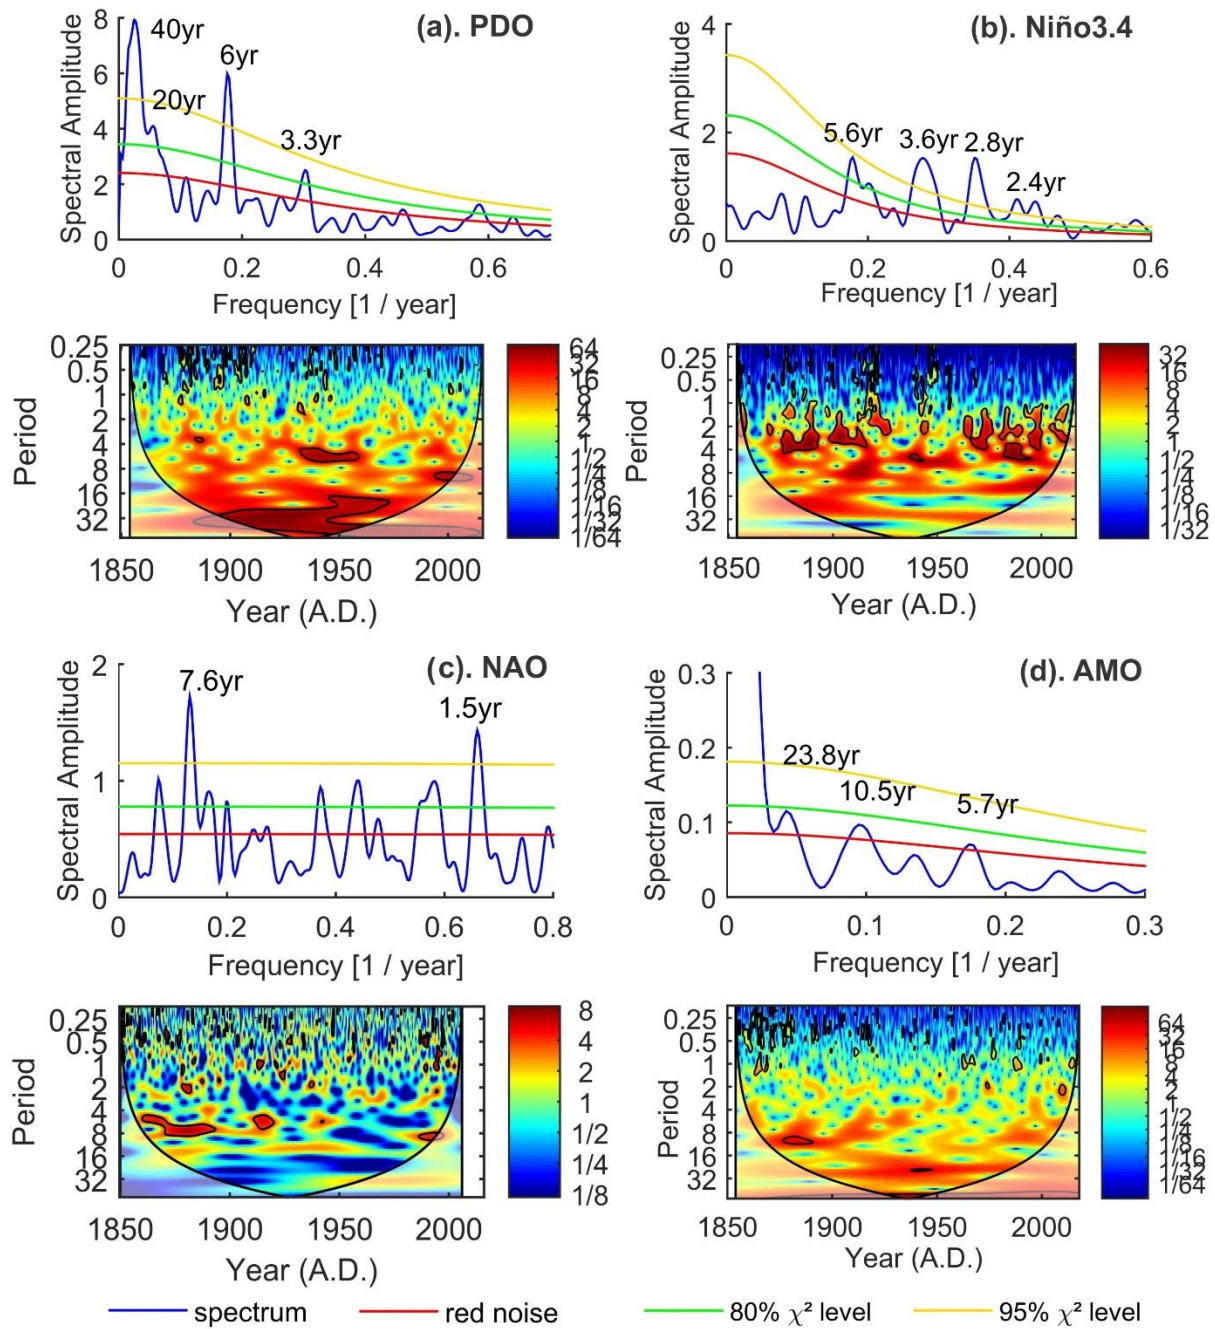

Figure S3: Spectral and wavelet analysis of climate-ocean indices:

(a) PDO (<https://www.ncdc.noaa.gov/teleconnections/pdo/>)

(b) ENSO ([https://climexp.knmi.nl/data/iersst\\_nino3.4a.dat](https://climexp.knmi.nl/data/iersst_nino3.4a.dat))

(c) NAO ([http://www.esrl.noaa.gov/psd/gcos\\_wgsp/Timeseries/Data/nao.long.data](http://www.esrl.noaa.gov/psd/gcos_wgsp/Timeseries/Data/nao.long.data)) and

(d) AMO ([https://climexp.knmi.nl/getindices.cgi?WMO=UKMODData/amo\\_hadsst&STATION](https://climexp.knmi.nl/getindices.cgi?WMO=UKMODData/amo_hadsst&STATION)).

91 Table S1: Equations used to calculate SST, SSS and TA.

| Coral Location                           | <sup>1,2,3</sup> Sr/Ca or Mg/Ca to SST                                                          | <sup>4</sup> SST, $\delta^{18}\text{O}_{\text{coral}}$ to $\delta^{18}\text{O}_{\text{sw}}$             | <sup>5</sup> $\delta^{18}\text{O}_{\text{sw}}$ to SSS             | <sup>6</sup> SSS to TA                                                                                                                               |
|------------------------------------------|-------------------------------------------------------------------------------------------------|---------------------------------------------------------------------------------------------------------|-------------------------------------------------------------------|------------------------------------------------------------------------------------------------------------------------------------------------------|
| Great Barrier Reef<br>(Wei et al., 2009) | $^1\text{Mg/Ca (mmol/mol)}_{\text{coral}} = 0.110 \times \text{SST (}^\circ\text{C)} + 1.32$    | $\delta^{18}\text{O}_{\text{sw}} = 0.189 \times \text{SST} + 0.12 + \delta^{18}\text{O}_{\text{coral}}$ | $\delta^{18}\text{O}_{\text{sw}} = 0.42 \times \text{SSS} - 14.3$ | $\text{TA} = 2305 + 58.66 \times (\text{SSS}-35) + 2.32 \times (\text{SSS}-35)^2 - 1.41 \times (\text{SST} - 20) + 0.040 \times (\text{SST} - 20)^2$ |
| South China Sea<br>(Wei et al., 2015)    | $^2\text{Sr/Ca (mmol/mol)}_{\text{coral}} = -0.084 \times \text{SST (}^\circ\text{C)} + 11.278$ | $\delta^{18}\text{O}_{\text{sw}} = 0.189 \times \text{SST} + 0.12 + \delta^{18}\text{O}_{\text{coral}}$ | $\delta^{18}\text{O}_{\text{sw}} = 0.42 \times \text{SSS} - 14.3$ | $\text{TA} = 2305 + 58.66 \times (\text{SSS}-35) + 2.32 \times (\text{SSS}-35)^2 - 1.41 \times (\text{SST} - 20) + 0.040 \times (\text{SST} - 20)^2$ |
| Sargasso Sea<br>(Goodkin et al., 2015)   | $^3\text{Sr/Ca (mmol/mol)}_{\text{coral}} = -0.0412 \times \text{SST (}^\circ\text{C)} + 10.3$  | $\delta^{18}\text{O}_{\text{sw}} = 0.189 \times \text{SST} + 0.12 + \delta^{18}\text{O}_{\text{coral}}$ | $\delta^{18}\text{O}_{\text{sw}} = 0.42 \times \text{SSS} - 14.3$ | $\text{TA} = 2305 + 53.97 (\text{SSS} - 35) + 2.74 (\text{SSS} - 35)^2 - 1.16 (\text{SST} - 20) - 0.040 (\text{SST} - 20)^2$                         |

92 <sup>1</sup> Yu et al. (2005); <sup>2</sup> Gagan et al. (2012); <sup>3</sup>Goodkin et al. (2005); <sup>4</sup> Iijima et al. (2005); <sup>5</sup>Morimoto et al. (2002); <sup>6</sup> Lee et al. (2006)

93

94

## S1: References

- Dickson, A. G.: Thermodynamics of the dissociation of boric acid in synthetic seawater from 273.15 to 318.15 K, Deep Sea Research Part A. Oceanographic Research Papers, 37, 755-766, 1990.
- Dickson, A. G., L., S. C., and Christian, J. R.: Guide to best practices for ocean CO<sub>2</sub> measurements, PICES Special Publication, 2007.
- Dickson, A. G. and Millero, F. J.: A comparison of the equilibrium constants for the dissociation of carbonic acid in seawater media, Deep Sea Research Part A. Oceanographic Research Papers, 34, 1733-1743, 1987.
- DOE: Handbook of Methods for the Analysis of the Various Parameters of the Carbon Dioxide System in Sea water. Version 2, Dickson, A.G. and Goyet, C., Eds., ORNL/CDIAC-74, Oak Ridge, Tennessee, 1994. chapter 5, p.11, 1994.
- Etheridge, D. M., Steele, L. P., Langenfelds, R. L., Francey, R. J., Barnola, J. M., and Morgan, V. I.: Natural and anthropogenic changes in atmospheric CO<sub>2</sub> over the last 1000 years from air in Antarctic ice and firn, Journal of Geophysical Research: Atmospheres, 101, 4115-4128, 1996.
- Gagan, M. K., Dunbar, G. B., and Suzuki, A.: The effect of skeletal mass accumulation in Porites on coral Sr/Ca and  $\delta^{18}\text{O}$  paleothermometry, Paleoceanography, 27, PA1203, 2012.
- Goodkin, N. F., Hughen, K. A., Cohen, A. L., and Smith, S. R.: Record of Little Ice Age sea surface temperatures at Bermuda using a growth-dependent calibration of coral Sr/Ca, Paleoceanography, 20, PA4016, 2005.
- Iijima, H., Kayanne, H., Morimoto, M., and Abe, O.: Interannual sea surface salinity changes in the western Pacific from 1954 to 2000 based on coral isotope analysis, Geophysical Research Letters, 32, L04608, 2005.

Lee, K., Kim, T.-W., Byrne, R. H., Millero, F. J., Feely, R. A., and Liu, Y.-M.: The universal ratio of boron to chlorinity for the North Pacific and North Atlantic oceans, *Geochimica et Cosmochimica Acta*, 74, 1801-1811, 2010.

Lee, K., Tong, L. T., Millero, F. J., Sabine, C. L., Dickson, A. G., Goyet, C., Park, G.-H., Wanninkhof, R., Feely, R. A., and Key, R. M.: Global relationships of total alkalinity with salinity and temperature in surface waters of the world's oceans, *Geophysical Research Letters*, 33, L19605, 2006.

Mehrbach, C., Culberson, C. H., Hawley, J. E., and Pytkowicz, R. M.: Measurement of the apparent dissociation constants of carbonic acid in seawater at atmospheric pressure, *Limnology and Oceanography*, 18, 897-907, 1973.

Millero, F. J.: *Chemical Oceanography*, Boca Raton, FL: CRC, 2006.

Morimoto, M., Abe, O., Kayanne, H., Kurita, N., Matsumoto, E., and Yoshida, N.: Salinity records for the 1997–98 El Niño from Western Pacific corals, *Geophysical Research Letters*, 29, 35-31-35-34, 2002.

Takahashi, T., Sutherland, S. C., Chipman, D. W., Goddard, J. G., Ho, C., Newberger, T., Sweeney, C., and Munro, D. R.: Climatological distributions of pH, pCO<sub>2</sub>, total CO<sub>2</sub>, alkalinity, and CaCO<sub>3</sub> saturation in the global surface ocean, and temporal changes at selected locations, *Marine Chemistry*, 164, 95-125, 2014.

Van Heuven, Pierrot, S., D. , Rae, J. W. B., Lewis, E., and Wallace, D. W. R.: MATLAB Program Developed for CO<sub>2</sub> System Calculations. ORNL/CDIAC-105b. Carbon Dioxide Information Analysis Center, Oak Ridge National Laboratory, U.S. Department of Energy, Oak Ridge, Tennessee, doi: 10.3334/CDIAC/otg.CO2SYS\_MATLAB\_v1.1, 2011. 2011.

Wagener, T., Lees, M. J., and Wheeler, H. S.: Monte-Carlo analysis toolbox user manual. Tech. Rep., Civil and Environmental Engineering Department, Imperial College of Science Technology and Medicine, 2001. 2001.

Yu, K.-F., Zhao, J.-X., Wei, G.-J., Cheng, X.-R., Chen, T.-G., Felis, T., Wang, P.-X., and Liu, T.-S.:  $\delta^{18}\text{O}$ , Sr/Ca and Mg/Ca records of *Porites lutea* corals from Leizhou Peninsula,



148 northern South China Sea, and their applicability as paleoclimatic indicators,  
149 Palaeogeography, Palaeoclimatology, Palaeoecology, 218, 57-73, 2005.

150 Zeebe, R. E. and Wolf-Gladrow, D. A.: CO<sub>2</sub> in Seawater: Equilibrium, Kinetics, Isotopes,  
151 Amsterdam: Elsevier, 2001. 2001.

152
